# Supplementary material for: Mechanistic investigation of aziridine aldehyde-driven peptide macrocyclization: the imidoanhydride pathway
Source: PubMed Central journal article supplement (PMC5949604; doi:10.1039/c5sc01958c), 2015-07-07
Supplement: SC-006-C5SC01958C-s001.pdf [file SC-006-C5SC01958C-s001.pdf]

Supplementary Information for

**Mechanistic investigation of aziridine aldehyde-driven peptide  
macrocyclization: the imidoanhydride pathway**

*Serge Zaretsky,<sup>1</sup> Jennifer L. Hickey,<sup>1,2</sup> Joanne Tan,<sup>1</sup> Dmitry Pichugin,<sup>3</sup> Megan A. St. Denis,<sup>1,2</sup>  
Spencer Ler,<sup>1</sup> Benjamin K. W. Chung,<sup>1</sup> Conor C. G. Scully,<sup>1</sup> and Andrei K. Yudin<sup>1\*</sup>*

<sup>1</sup>Davenport Research Laboratories, Department of Chemistry, University of Toronto, 80 St. George Street, Toronto, Ontario M5S 3H6, Canada

<sup>2</sup>Encycle Therapeutics Inc., 101 College Street, Suite 314, Toronto, Ontario M5G 1L7, Canada

<sup>3</sup>Center for Structural Investigations of Complex Organic Molecules and Polymers, Department of Chemistry, University of Toronto, 80 St. George Street, Toronto, Ontario M5S 3H6, Canada

|                                                                                  |           |
|----------------------------------------------------------------------------------|-----------|
| <b>SUPPLEMENTARY METHODS.....</b>                                                | <b>3</b>  |
| General Information .....                                                        | 3         |
| Chromatography.....                                                              | 3         |
| Nuclear magnetic resonance spectra .....                                         | 3         |
| Mass Spectrometry.....                                                           | 3         |
| LC/MS.....                                                                       | 3         |
| RP-HPLC SP .....                                                                 | 4         |
| General telescopic synthesis.....                                                | 4         |
| General aziridine-containing peptide synthesis .....                             | 4         |
| <b>SUPPLEMENTARY DISCUSSION.....</b>                                             | <b>5</b>  |
| Assay yield for macrocycle formation .....                                       | 5         |
| Kinetics of peptide macrocyclization.....                                        | 6         |
| Crystal structure of S1.....                                                     | 9         |
| Additional figures for structural assignment of bridged-amidine structures ..... | 10        |
| Model systems for mechanism of cyclization.....                                  | 11        |
| Isolation of imidate intermediate .....                                          | 13        |
| <b>COMPOUND CHARACTERIZATION .....</b>                                           | <b>15</b> |
| <b>REFERENCES .....</b>                                                          | <b>24</b> |
| <b>NMR SPECTRA .....</b>                                                         | <b>25</b> |
| <b>CRYSTALLOGRAPHIC DATA.....</b>                                                | <b>70</b> |

## Supplementary Methods

**General Information:** TFE (2,2,2-trifluoroethanol) and HFIP (1,1,1,3,3,3-hexafluoro-2-isopropanol) were of reagent grade quality. Linear peptide precursors were synthesized by Fmoc solid-phase-based peptide synthesis using 2-chlorotrityl chloride resin and double coupling steps with HBTU. Amino acid reagents were sourced from AAPPTec LLC, Louisville, Kentucky, USA and P3 BioSystems, LLC, Shelbyville, Kentucky, USA. Peptide grade DIPEA, *tert*-butyl isocyanide, thiobenzoic acid, and Raney<sup>®</sup>-Nickel (W.R. Grace and Co. Raney<sup>®</sup>2800, slurry, in H<sub>2</sub>O, active catalyst) were sourced from Sigma Aldrich (Oakville, ON). Peptide grade NMP and DMF were sourced from Caledon Laboratories Ltd., Georgetown, Ontario, Canada. <sup>13</sup>C-labelled amino acids were sourced from Cambridge Isotope Laboratories, Inc., Tewksbury, Massachusetts, USA. Aziridine aldehyde dimer **3**, the *D*-serine-based enantiomer, and the *D*-leucine-derived aziridine aldehyde dimer were prepared as per literature procedures.<sup>1-4</sup>

**Chromatography:** Flash column chromatography was carried out using Silicycle 230-400 mesh silica gel. Thin-layer chromatography (TLC) was performed on Macherey Nagel pre-coated glass backed TLC plates (SIL G/UV254, 0.25 mm) and visualized using a UV lamp (254 nm) and iodine stain.

**Nuclear magnetic resonance spectra:** <sup>1</sup>H and <sup>13</sup>C NMR spectra were recorded on Varian Mercury 400 and Agilent 500 MHz, 600 MHz, and 700 MHz spectrometers. <sup>1</sup>H NMR spectra were referenced to CDCl<sub>3</sub> (δ 7.26 ppm), CD<sub>3</sub>OD (δ 3.30 ppm), DMSO-*d*<sub>6</sub> (δ 2.50 ppm), Acetone-*d*<sub>6</sub> (δ 2.05 ppm), and TFE-*d*<sub>3</sub> (δ 5.02 ppm). <sup>13</sup>C NMR spectra were referenced to CDCl<sub>3</sub> (δ 77.2 ppm), CD<sub>3</sub>OD (δ 49.0 ppm), DMSO-*d*<sub>6</sub> (δ 39.52 ppm), Acetone-*d*<sub>6</sub> (δ 29.92 ppm), and TFE-*d*<sub>3</sub> (δ 126.28 ppm). Peak multiplicities are designated by the following abbreviations: s, singlet; bs, broad singlet; d, doublet; t, triplet; q, quartet; m, multiplet; ds, doublet of singlets; dd, doublet of doublets; dt, doublet of triplets; ddd, doublet of doublet of doublets; bt, broad triplet; td, triplet of doublets; tdd, triplet of doublets of doublets.

**Mass Spectrometry:** High-resolution mass spectra were obtained on a VG 70-250S (double focusing) mass spectrometer at 70 eV on a QStar XL (AB Sciex, Concord, ON, Canada) mass spectrometer with electrospray ionization (ESI) source, MS/MS and accurate mass capabilities. Alternatively, a JEOL AccuTOF model JMS-T1000LC mass spectrometer equipped with a Direct Analysis in Real Time (DART) ion source was used to acquire high-resolution mass spectra.

**LC/MS:** Low-resolution mass spectra (ESI) were collected on an HPLC paired to a single-quad mass spectrometer. Compounds were resolved on an Agilent Poroshell 120 EC-C<sub>18</sub>, 2.7 μm, 4.6 x 50 mm<sup>2</sup> column at room temperature with a flow of 1 mL/min. The gradient consisted of eluents A (0.1% formic acid in double distilled water) and B (0.1% formic acid in HPLC-grade acetonitrile). The gradient method started at 5% of B for the first 1.0 minutes, followed by a linear gradient from 5% to 95% B in 8.0 minutes. The column was then washed with 95% B for 1.0 minutes and equilibrated at 5% B for 1.5 minutes.

**RP-HPLC SP xx to yy (defined individually):** Compounds were resolved on an Agilent Zorbax SB-C18, 5.0  $\mu\text{m}$ , 9.4 x 250 mm<sup>2</sup> column on an Agilent semi-preparative purification system at room temperature with a flow of 5 mL/min, or on a RediSep Rf Gold<sup>®</sup> C18 30 g column on a Teledyne ISCO Combiflash<sup>®</sup> Rf 200 at room temperature with a flow of 35 mL/min. The gradient consisted of eluents A (0.1% formic acid in double distilled water) and B (0.1% formic acid in HPLC-grade acetonitrile). The gradient method started at xx% of B for the first 3.0 minutes, followed by a linear gradient from xx% to yy% B in 25 minutes. The column was then washed with 95% B for 5.0 minutes and equilibrated at 5% B for 2 minutes.

**General telescopic synthesis:** To a two-dram vial equipped with a stir bar was added linear peptide (0.15 mmol), parent aziridine aldehyde dimer (21.5 mg, 0.15 mmol), and TFE (1.5 mL). After stirring for two minutes, <sup>t</sup>BuNC (18.8  $\mu\text{L}$ , 0.3 mmol) was added and the mixture was stirred at room temperature for six hours. Thiobenzoic acid (70  $\mu\text{L}$ , 0.6 mmol) was then added and following stirring for an additional 1.5 hours, Raney Ni (approx. 2g of slurry) was added and the reaction was left to stir overnight. The mixture was then filtered over celite and concentrated under reduced pressure. Deprotection of the Boc side chain protecting groups was accomplished by dissolving peptides in 50% TFA/DCM (4 mL) and stirring for two hours. Subsequently, the cleavage mixture was evaporated under reduced pressure and the peptides were precipitated twice from diethyl ether. Peptide macrocycles were then purified by RP-HPLC and lyophilized.

**General aziridine-containing peptide synthesis:** To a two-dram vial equipped with a stir bar was added linear peptide (0.15 mmol), parent aziridine aldehyde dimer (21.5 mg, 0.15 mmol), and TFE (1.5 mL). After stirring for two minutes, <sup>t</sup>BuNC (18.8  $\mu\text{L}$ , 0.3 mmol) was added and the mixture was stirred at room temperature for four hours. Then, the mixture was evaporated under reduced pressure, the peptide was re-dissolved in DCM, and purified by flash column chromatography (EtOAc $\rightarrow$ MeOH).

## Supplementary Discussion

### Assay yield for macrocycle formation

In order to quantify the assay yield of **13**, the reaction was followed by  $^{13}\text{C}$  NMR with  $^{13}\text{C}$ -labelled substrate **11** (Supplementary Scheme 1). A  $^{13}\text{C}$ -labelled analogue **11** was prepared by solid-phase peptide synthesis (SPPS) with the C-terminal L-phenylalanine residue having a  $^{13}\text{C}$ -labelled carboxylate. The resulting linear peptide was cyclized with aziridine aldehyde **3** and *tert*-butyl isocyanide in a 1:1 mixture of TFE/DCM- $d_2$  in a 3 mm NMR tube. The starting material was observed at 179.6 ppm and the product was observed at 184.0 ppm (Supplementary Figure 1).

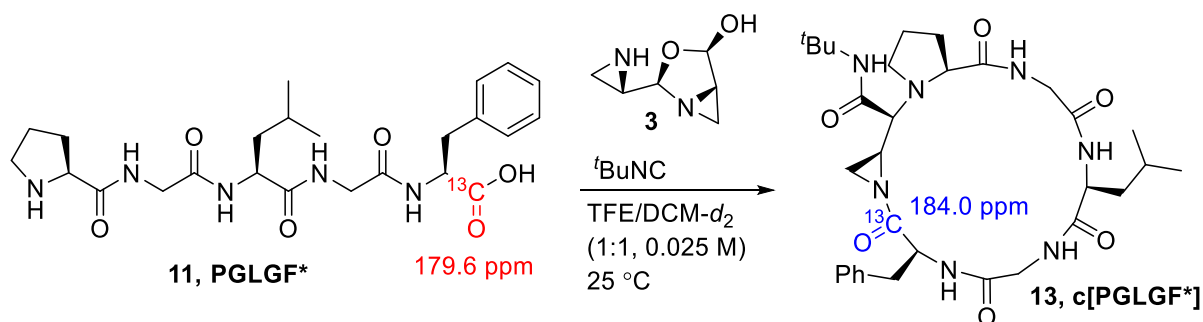

Supplementary Scheme 1 Conversion of **11** to **13** as observed by  $^{13}\text{C}$  NMR

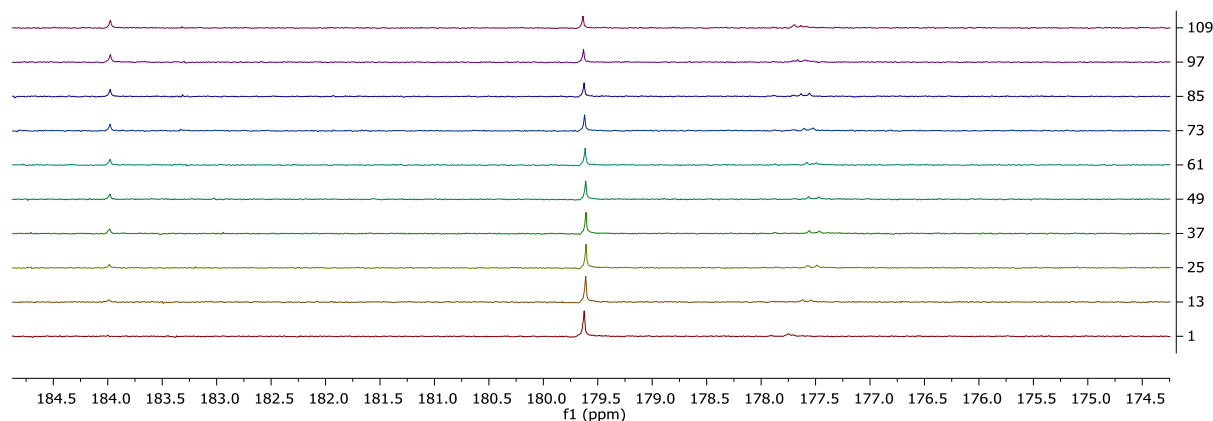

Supplementary Figure 1 Conversion of **11** to **13** as observed by  $^{13}\text{C}$  NMR (each shown spectrum was collected 360 seconds apart)

The reaction was followed periodically for seven hours and the  $^{13}\text{C}$  peaks for the starting material and product were integrated at each time point (every 30 seconds, Supplementary Figure 2). Conversion was calculated by subtracting the area of the starting material peak at the initial time point. Yield was determined by comparing the relative area of the product peak to the initial area of the starting material peak. Selectivity was calculated by dividing the yield by conversion.

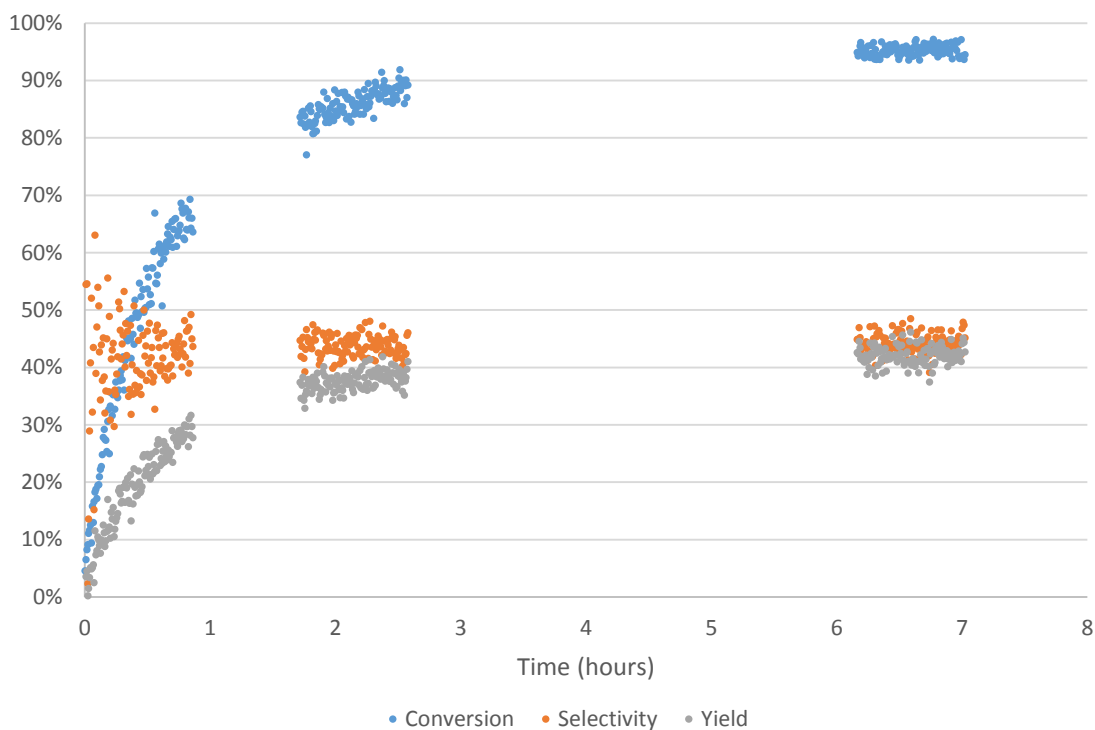

**Supplementary Figure 2** Conversion of **11** to **13** as observed by  $^{13}\text{C}$  NMR over seven hours

### ***Kinetics of peptide macrocyclization***

The reaction kinetics for cyclization of  $\text{PS}(\text{tBu})\text{LY}(\text{tBu})\text{F}$  were followed by making a  $^{13}\text{C}$ -labelled analogue **10** and following the progress by  $^{13}\text{C}$  NMR. Selectivity was studied as per the PGLGF results (see previous section), and was determined to be approximately 80% throughout the reaction time.

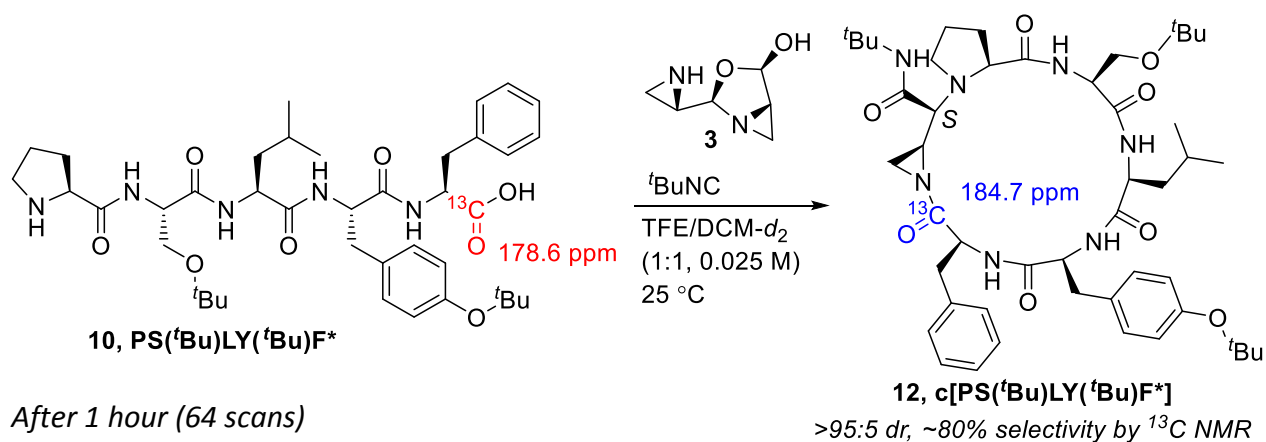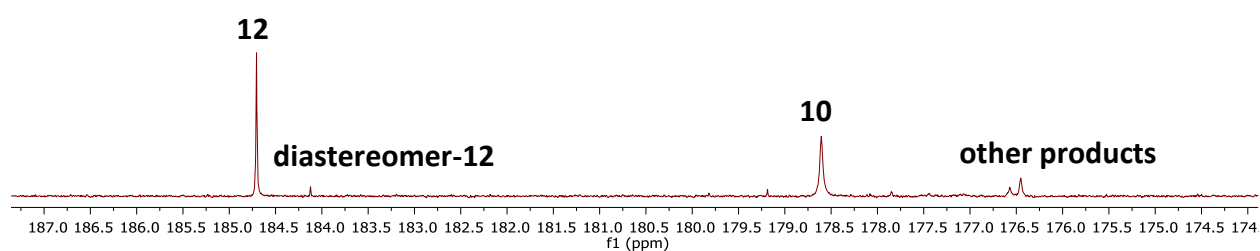

**Supplementary Figure 3** Cyclization of **10** produces **12** with good selectivity

Linear peptide **10** was cyclized under a variety of pseudo-first order reaction conditions in aziridine aldehyde dimer. With the initial concentration of 6.25 mM of aziridine aldehyde dimer **3**, a maximum of 12.5 mM of product could be produced. Accordingly, the initial conditions were set to 125 mM in peptide and *tert*-butyl isocyanide, which corresponds to ten-fold excesses of each component. The conditions were then varied to encompass both 15- and 20-fold excesses of peptide or isocyanide (Supplementary Table 1).

**Supplementary Table 1** Conditions for pseudo-first order cyclization of linear peptide **10**

| Reactant                  | Initial conditions | 15x <b>10</b> conditions | 15x <sup>t</sup> BuNC conditions | 20x <sup>t</sup> BuNC conditions | 20x <b>10</b> conditions |
|---------------------------|--------------------|--------------------------|----------------------------------|----------------------------------|--------------------------|
| <b>[3]</b>                | 6.25               | 6.25                     | 6.25                             | 6.25                             | 6.25                     |
| <b>[10]</b>               | 125                | 188                      | 125                              | 125                              | 250                      |
| <b>[<sup>t</sup>BuNC]</b> | 125                | 125                      | 188                              | 250                              | 125                      |

Concentrations in mM.

The reactions were performed in 3 mm NMR tubes and monitored every 15 seconds, to include a 12 second relaxation delay. The average integrated area of aziridine amide <sup>13</sup>C peak

for three successive time points (over 45 seconds) was then plotted and nearly identical curves were observed for all five conditions (Supplementary Figure 4). The  $k_{obs}$  values were derived from the lines of best fit for the logarithmic plots (Supplementary Figure 5) and were invariant with respect to concentration of peptide or isocyanide (Supplementary Table 2). From the product formation curves, we saw no change in the half-life of the reaction with different concentrations of peptide or isocyanide. The  $R^2$  value for the 20-fold excess of peptide (Supplementary Table 2, entry 5) was much lower than the other values and could be attributed to limits of solubility for the linear peptide in the reaction conditions.

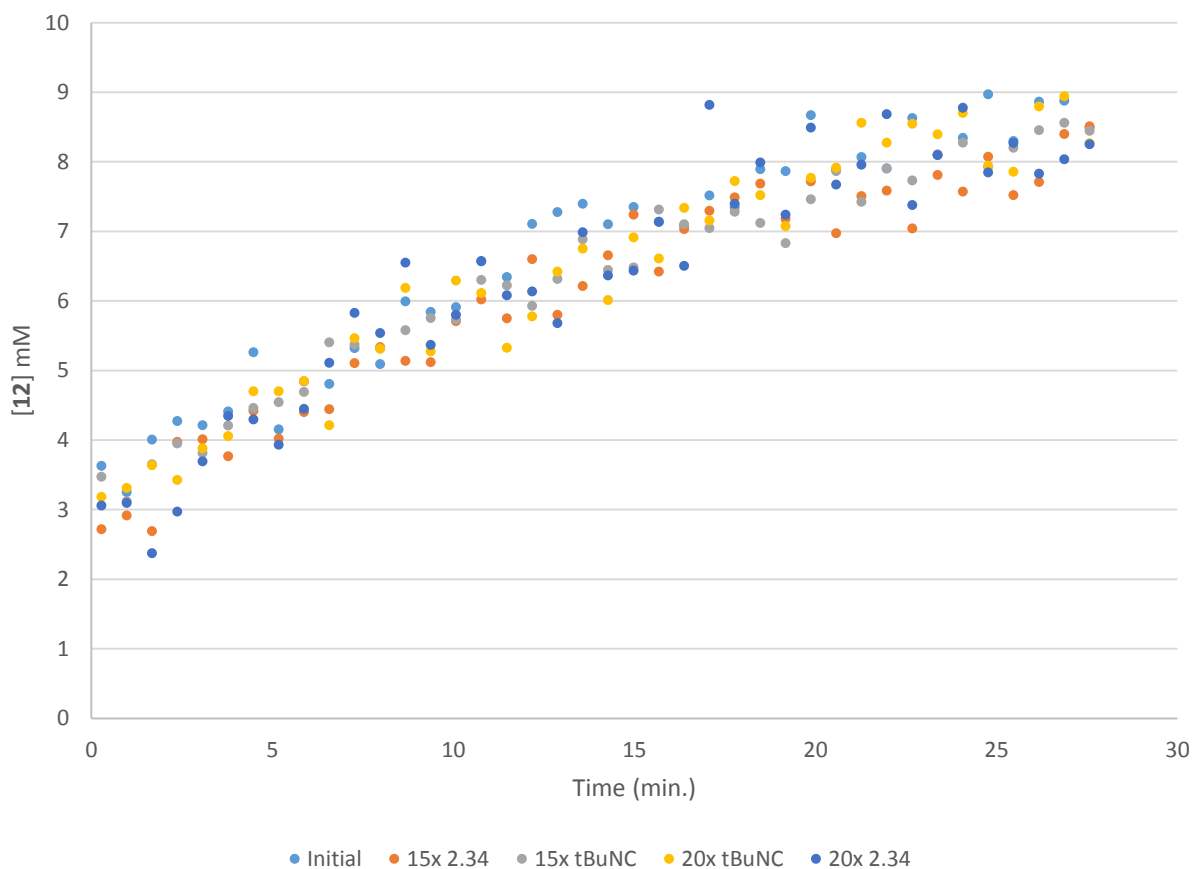

**Supplementary Figure 4** Formation of **12** under pseudo-first order conditions in **3**



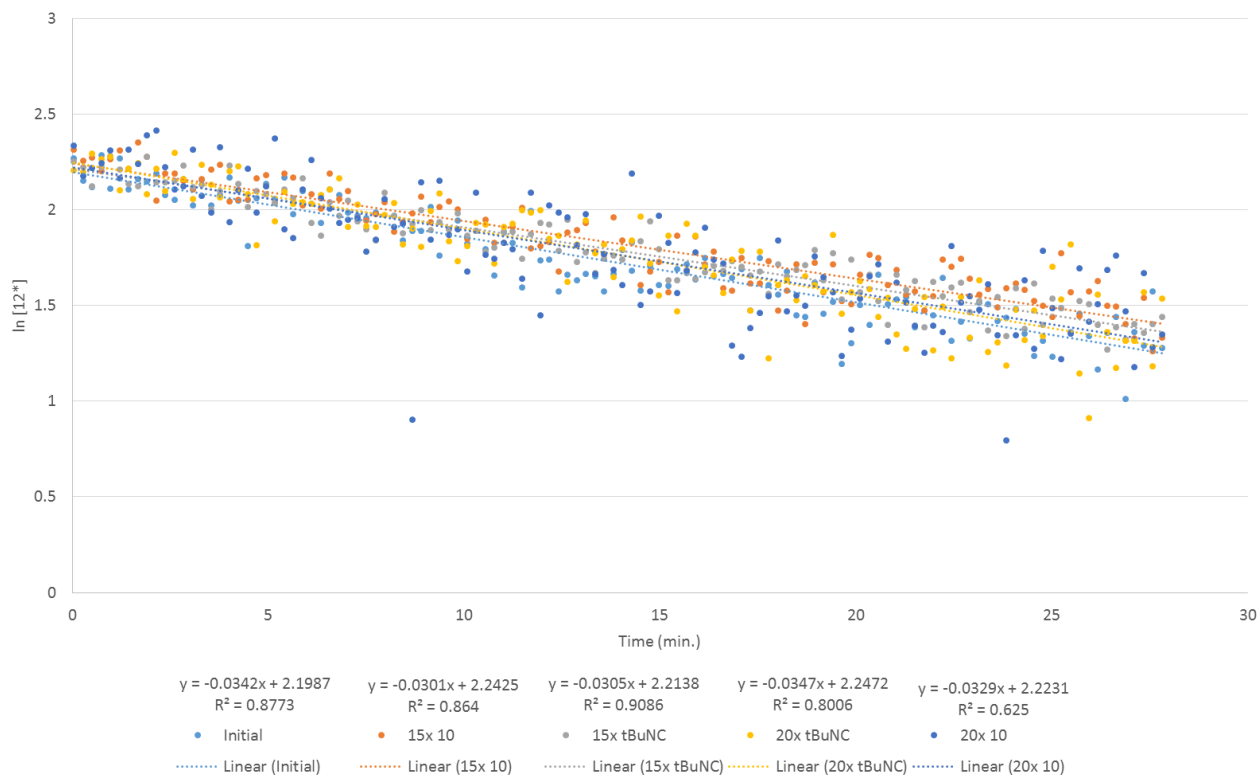

**Supplementary Figure 5** Logarithmic plots for kinetics of **12** formation

**Supplementary Table 2**  $k_{obs}$  calculated from logarithmic plots for the conversion of **10** to **12**

|                             | Equation                | $R^2$ | $k_{obs}$ ( $\text{min}^{-1}$ ) |
|-----------------------------|-------------------------|-------|---------------------------------|
| <b>Initial</b>              | $y = -0.0342x + 2.1987$ | 0.877 | 0.034                           |
| <b>15x 10</b>               | $y = -0.0301x + 2.2425$ | 0.864 | 0.030                           |
| <b>15x <sup>t</sup>BuNC</b> | $y = -0.0305x + 2.2138$ | 0.909 | 0.031                           |
| <b>20x <sup>t</sup>BuNC</b> | $y = -0.0347x + 2.2472$ | 0.801 | 0.035                           |
| <b>20x 10</b>               | $y = -0.0329x + 2.2231$ | 0.625 | 0.033                           |

### Crystal structure of **S1**

We have previously shown that the cyclization of secondary amines, both in piperazinone formation and peptide macrocyclization, proceeds with very high selectivity.<sup>5</sup> The linear peptide **16**, PALGF, was cyclized with aziridine aldehyde dimer **3** by the telescopic method to render aziridine ring-opened macrocycle **S1** (Supplementary Figure 6). In an X-ray

crystal structure of **S1**, the stereocenter at the exocyclic amide was determined to be *S*-configured, which parallels our earlier findings.<sup>5</sup>

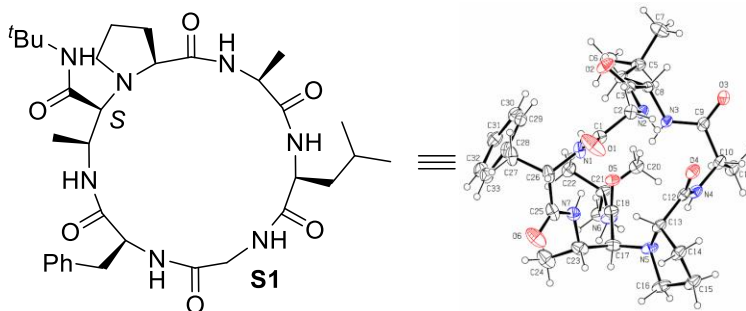

**Supplementary Figure 6** Aziridine ring-opened macrocycle **S1**, derived from **16B**, with ORTEP depiction of the crystal structure of **S1** exhibiting *S*-stereochemistry at the newly-derived stereocenter

**Additional figures for structural assignment of bridged-amidine structures**

Newly noted resonances for the linker protons were found in the <sup>1</sup>H NMR of **18C** (Supplementary Figure 7). <sup>1</sup>H-<sup>13</sup>C HMBC NMR was used to establish connectivity to linker carbon atoms (Supplementary Figure 8).

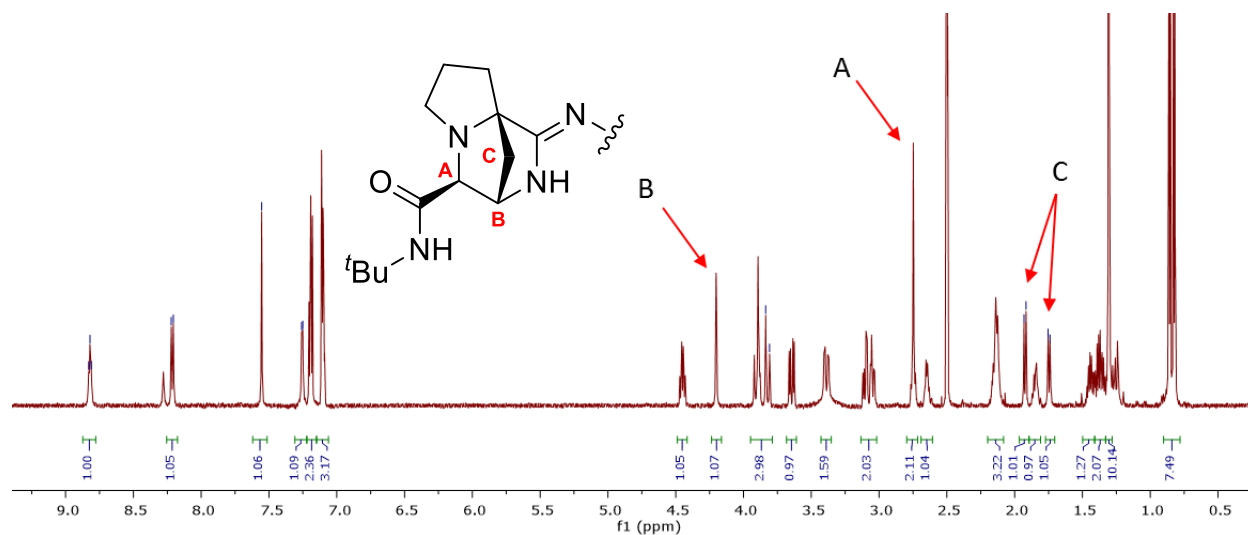

**Supplementary Figure 7** <sup>1</sup>H NMR of **18C** showing the three newly incorporated linker signals

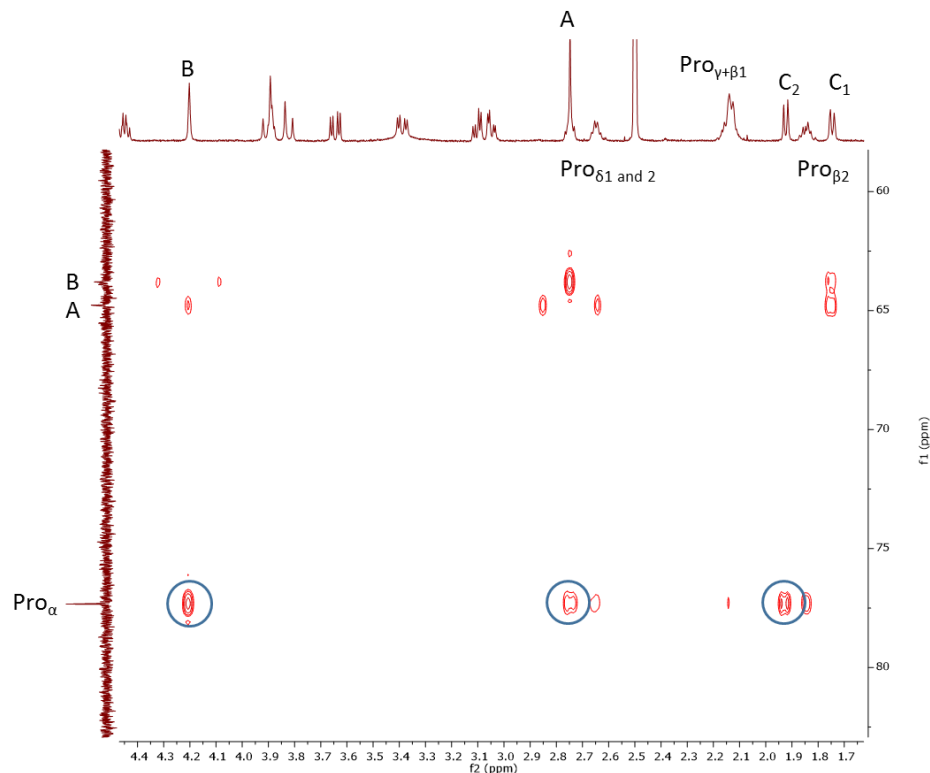

**Supplementary Figure 8**  $^1\text{H}$ - $^{13}\text{C}$  HMBC NMR of **18C** showing cross peaks between the  $\text{P}_\alpha\text{-C}$  and the new proton resonances A, B, and C

### ***Model systems for mechanism of cyclization***

Cyclization of peptides with *N*-methyl amino acids in the second position was not successful (Supplementary Figure 9). Proline analogues also failed to undergo the cyclization reaction (Supplementary Figure 10). The cyclization of  $\text{PS}(\text{tBu})\text{LYF}(\text{tBu})$  under heterochiral pairing conditions with aziridine aldehyde dimer enantiomer-**3**, led to only trace macrocycle formation and as a mixture of diastereomers. Finally, no reaction was observed with the *L*- $\beta$ -homo-proline derivative **S8** (Supplementary Figure 11).

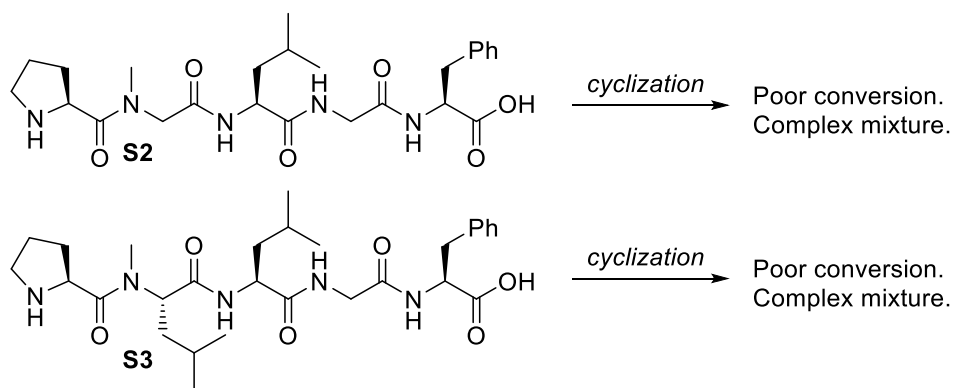

**Supplementary Figure 9** Submission of *N*-methylated analogues **S2** and **S3** to cyclization conditions did not lead to formation of macrocyclic or amidine products

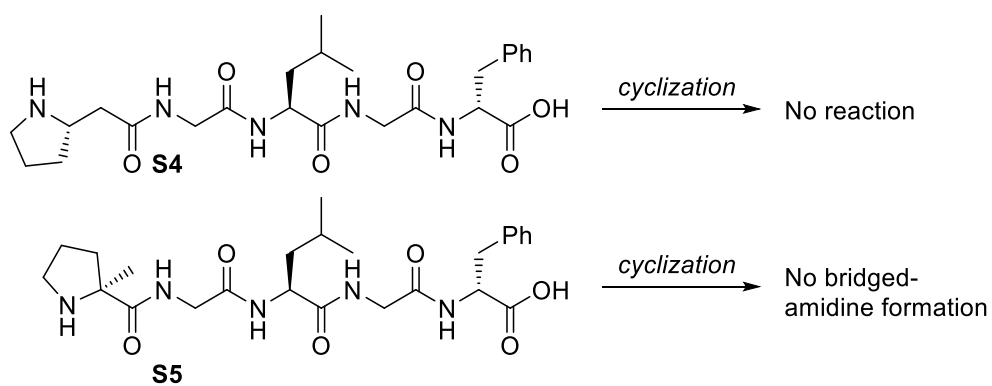

**Supplementary Figure 10** Proline analogues **S4** and **S5** block the formation of bridged-amidine products

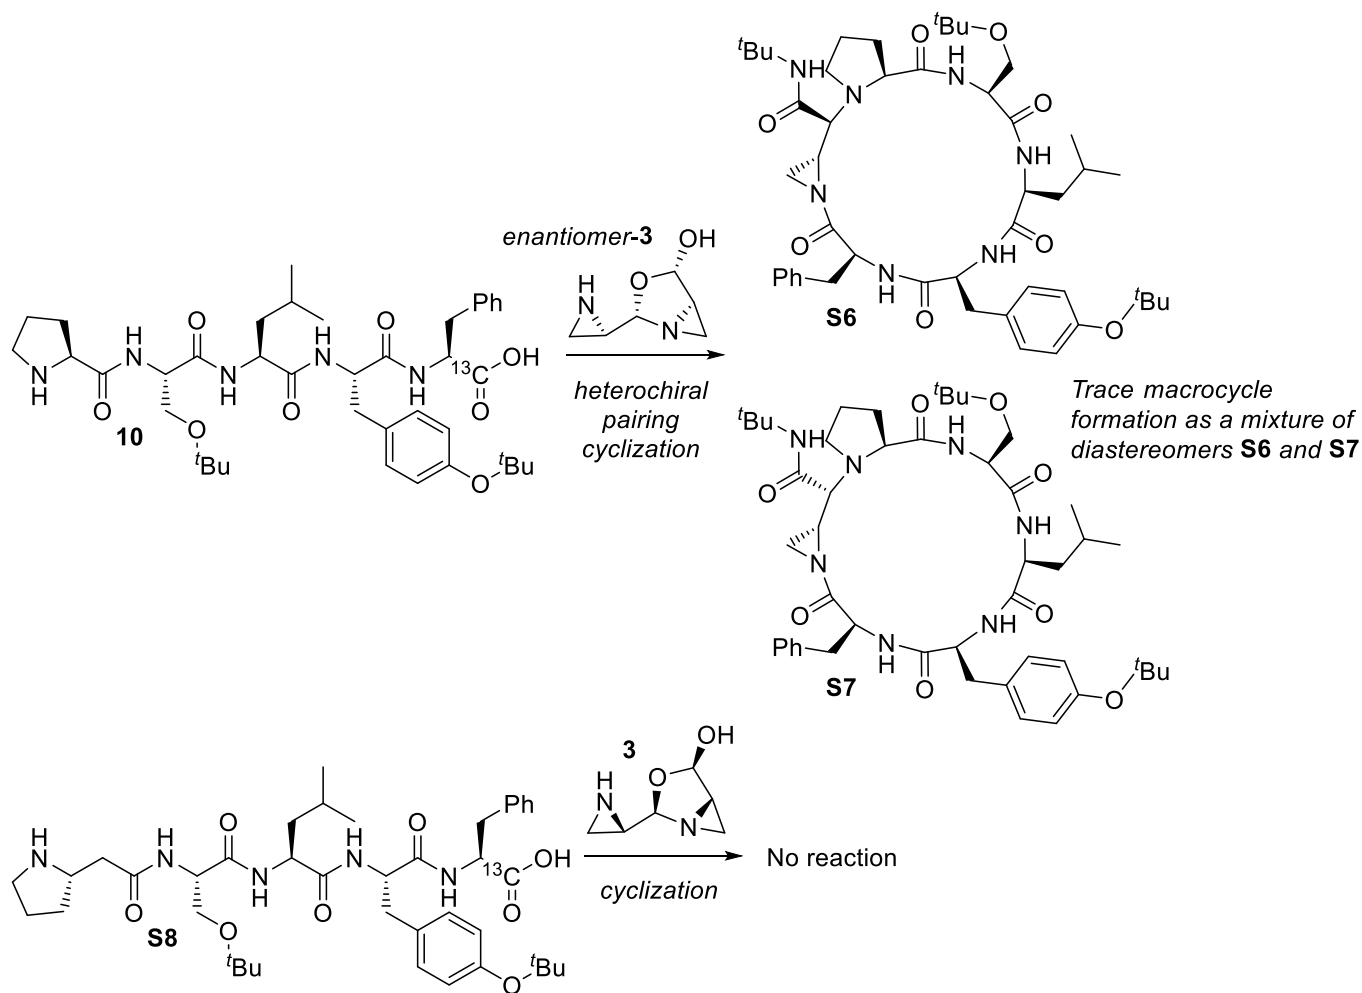

**Supplementary Figure 11** Challenging the cyclization of the PS(<sup>t</sup>Bu)LYF(<sup>t</sup>Bu) sequence with linear peptide **10** under mismatch conditions with *R*-aziridine aldehyde dimer (*enantiomer-3*) or with L-β-homo-proline linear peptide derivative **S8** and *S*-aziridine aldehyde dimer **3** led to poor reactivity

### Isolation of imidate intermediate

In order to isolate the imidate intermediate, we resorted to flash chromatography for purification as the imidate was not stable to reversed-phase purification. The dipeptide PL was exposed to cyclization conditions with aziridine aldehyde dimer and isocyanide, resulting in a 21% yield of the imidate product.

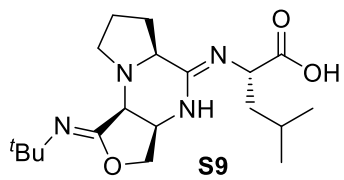

**Supplementary Figure 12** Imidate **S9** isolated from PL dipeptide cyclization

## Compound Characterization

### c[PGLGF] (14B)

Previously reported.<sup>5,6</sup>

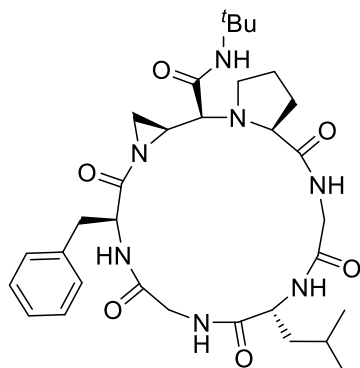

### c[PGIGF] (15B)

The peptide was cyclized at 0.2 mmol scale. Following purification by flash chromatography (EtOAc→MeOH), the pure fractions were pooled to afford 35.0 mg of the title compound in 28% overall yield. ESI MS [M+H]<sup>+</sup> expected: 626.4, experimental: 626.4. ESI-TOF MS [M+H]<sup>+</sup> expected: 626.3661, experimental: 626.3656. <sup>1</sup>H NMR (DMSO-*d*<sub>6</sub>, 500 MHz) δ 8.34 (dd, *J* = 7.2, 5.3 Hz, 1H), 8.18 (d, *J* = 6.8 Hz, 1H), 8.04 (dd, *J* = 7.9, 4.3 Hz, 1H), 7.58 (d, *J* = 8.5 Hz, 1H), 7.30 (s, 1H), 7.27 – 7.21 (m, 2H), 7.21 – 7.16 (m, 3H), 4.54 (td, *J* = 8.0, 6.7 Hz, 1H), 4.17 (dd, *J* = 16.0, 8.0 Hz, 1H), 4.12 – 4.04 (m, 1H), 3.73 (dd, *J* = 16.1, 7.2 Hz, 1H), 3.43 (ddd, *J* = 16.0, 7.4, 4.7 Hz, 2H), 3.13 – 2.98 (m, 4H), 2.79 (dd, *J* = 13.3, 6.7 Hz, 1H), 2.43 – 2.34 (m, 1H), 2.35 – 2.29 (m, 1H), 2.25 – 2.20 (m, 1H), 2.12 – 2.01 (m, 1H), 2.01 (dd, *J* = 3.4, 1.2 Hz, 1H), 1.64 (m, 4H), 1.54 – 1.32 (m, 2H), 1.27 (s, 9H), 0.90 – 0.85 (m, 6H). <sup>13</sup>C NMR (DMSO-*d*<sub>6</sub>, 126 MHz) δ 180.9, 174.5, 172.6, 169.6, 168.8, 168.7, 137.5, 129.2, 128.2, 126.4, 70.6, 65.2, 55.1, 52.1, 51.6, 50.2, 42.9, 41.7, 40.3, 38.0, 37.0, 31.5, 30.9, 28.4, 24.2, 23.6, 22.9, 21.6.

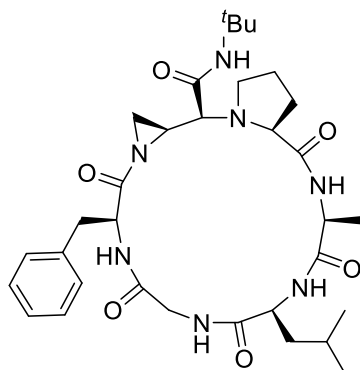

### c[PALGF] (16B)

The peptide was cyclized at 0.08 mmol scale. Following purification by flash chromatography (EtOAc→MeOH), the pure fractions were pooled to afford 5.9 mg of the title compound in 12% overall yield. ESI MS [M+H]<sup>+</sup> expected: 640.4, experimental: 640.4. LC/MS retention time 6.647 min. <sup>1</sup>H NMR (DMSO-*d*<sub>6</sub>, 500 MHz) δ 8.37 (dd, *J* = 7.0, 5.0 Hz, 1H), 8.18 (d, *J* = 7.2 Hz, 1H), 8.07

(dd,  $J = 8.5, 6.7$  Hz, 2H), 7.78 (s, 1H), 7.31 – 7.14 (m, 6H), 4.62 (td,  $J = 9.3, 5.7$  Hz, 1H), 4.22 (p,  $J = 7.3$  Hz, 1H), 4.17 – 4.10 (m, 1H), 3.92 (dd,  $J = 15.6, 7.0$  Hz, 1H), 3.55 – 3.49 (m, 1H), 3.23 (dd,  $J = 15.5, 4.9$  Hz, 1H), 3.16 – 3.04 (m, 3H), 2.87 (d,  $J = 8.0$  Hz, 1H), 2.84 – 2.71 (m, 2H), 2.40 (d,  $J = 5.9$  Hz, 1H), 2.18 – 2.14 (m, 1H), 2.05 (ddd,  $J = 13.7, 8.4, 3.8$  Hz, 1H), 1.75 – 1.56 (m, 5H), 1.56 – 1.44 (m, 1H), 1.27 (d,  $J = 3.4$  Hz, 12H), 0.92 – 0.84 (m, 6H).  $^{13}\text{C}$  NMR (DMSO- $d_6$ , 126 MHz)  $\delta$  182.1, 175.0, 172.6, 171.9, 170.1, 168.5, 137.5, 129.2, 128.1, 126.3, 67.8, 66.8, 63.6, 55.4, 53.1, 51.5, 51.2, 50.7, 50.6, 49.4, 42.9, 36.9, 36.1, 31.0, 30.1, 29.0, 28.5, 28.3, 28.1, 28.0, 24.2, 23.8, 23.1, 23.0, 21.8, 21.4, 18.1, 16.6, 13.7, 13.3.

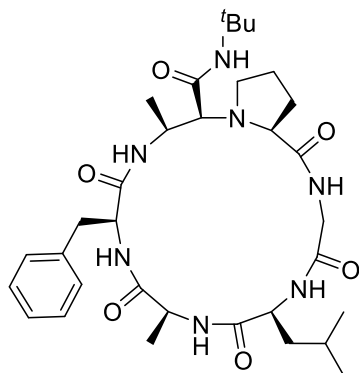

#### c\*[PGLAF] (17B<sup>a</sup>)

After cyclization, filtration, and deprotection 45.8 mg of peptide was recovered. Following purification by RP-HPLC SP 15 to 35, the pure fractions were pooled to afford 8.7 mg of the title compound in 9.0% overall yield. ESI MS  $[\text{M}+\text{H}]^+$  expected: 642.4, experimental: 642.4. ESI-TOF MS  $[\text{M}+\text{H}]^+$  expected: 642.3974, experimental: 642.3974. LC/MS retention time 5.771 min.  $^1\text{H}$  NMR (DMSO- $d_6$ , 500 MHz)  $\delta$  8.72 (d,  $J = 2.9$  Hz, 1H), 8.44 (dd,  $J = 6.9, 5.6$  Hz, 1H), 7.94 (s, 1H), 7.32 – 7.11 (m, 6H), 7.05 (d,  $J = 8.6$  Hz, 1H), 6.57 (s, 1H), 4.33 (ddd,  $J = 11.5, 8.0, 3.4$  Hz, 1H), 4.08 – 3.99 (m, 1H), 3.88 (s, 1H), 3.84 – 3.73 (m, 2H), 3.59 (ddd,  $J = 15.5, 7.0, 1.2$  Hz, 1H), 3.27 – 3.06 (m, 4H), 2.90 – 2.82 (m, 1H), 1.94 – 1.83 (m, 1H), 1.77 – 1.61 (m, 5H), 1.39 – 1.29 (m, 1H), 1.21 (s, 9H), 1.10 (d,  $J = 7.1$  Hz, 3H), 1.03 (d,  $J = 6.4$  Hz, 3H), 0.92 (dd,  $J = 16.0, 6.5$  Hz, 6H).  $^{13}\text{C}$  NMR (DMSO- $d_6$ , 126 MHz)  $\delta$  174.1, 173.5, 172.1, 169.3, 169.2, 168.8, 139.1, 129.1, 128.1, 126.1, 64.9, 64.7, 64.7, 51.4, 50.4, 50.3, 49.7, 45.2, 45.2, 43.3, 41.7, 34.2, 28.8, 28.1, 28.1, 24.3, 23.7, 23.1, 21.1, 18.7, 16.0.

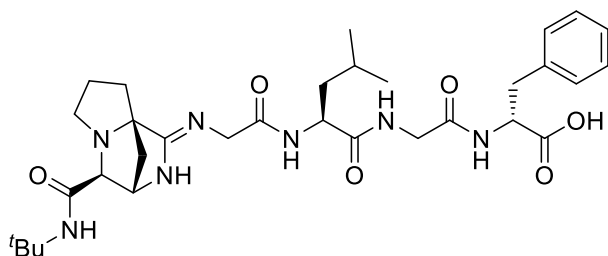

#### br[PGLGf] (18C)

The peptide was cyclized at 0.51 mmol scale and ring-opened with thiobenzoic acid (2.5 mmol) for one hour prior to solvent evaporation. Following purification first by flash chromatography (EtOAc  $\rightarrow$  MeOH), then by RP-HPLC SP 10 to 50, the pure fractions were pooled to afford 39.0



mg of the title compound in 12% overall yield. ESI MS  $[M+H]^+$  expected: 626.4, experimental: 626.4. ESI-TOF MS  $[M+H]^+$  expected: 626.3661, experimental: 626.3654. LC/MS retention time 5.840 min.  $^1\text{H}$  NMR (DMSO- $d_6$ , 500 MHz)  $\delta$  8.83 (d,  $J = 6.2$  Hz, 1H), 8.21 (d,  $J = 9.1$  Hz, 1H), 7.56 (s, 1H), 7.25 (d,  $J = 5.0$  Hz, 1H), 7.19 (dd,  $J = 8.0, 7.0$  Hz, 2H), 7.10 (ddt,  $J = 7.1, 3.2, 1.5$  Hz, 3H), 4.46 (td,  $J = 8.8, 6.3$  Hz, 1H), 4.21 (s, 1H), 3.98 – 3.76 (m, 3H), 3.65 (dd,  $J = 16.6, 6.0$  Hz, 1H), 3.38 (dd,  $J = 16.6, 5.9$  Hz, 1H), 3.08 (m, 2H), 2.81 – 2.70 (m, 2H), 2.66 (q,  $J = 8.1, 7.5$  Hz, 1H), 2.21 – 2.07 (m, 3H), 1.93 (d,  $J = 9.4$  Hz, 1H), 1.90 – 1.77 (m, 1H), 1.75 (dd,  $J = 9.6, 2.0$  Hz, 1H), 1.54 – 1.32 (m, 3H), 1.31 (s, 9H), 0.84 (dd,  $J = 16.7, 6.4$  Hz, 6H).  $^{13}\text{C}$  NMR (DMSO- $d_6$ , 126 MHz)  $\delta$  172.6, 171.9, 169.0, 168.1, 167.4, 165.9, 138.6, 129.7, 127.8, 125.7, 77.3, 64.8, 63.8, 55.0, 50.4, 50.3, 45.4, 44.4, 42.6, 42.1, 41.1, 36.2, 28.4, 26.5, 24.2, 22.6, 22.1, 20.0.

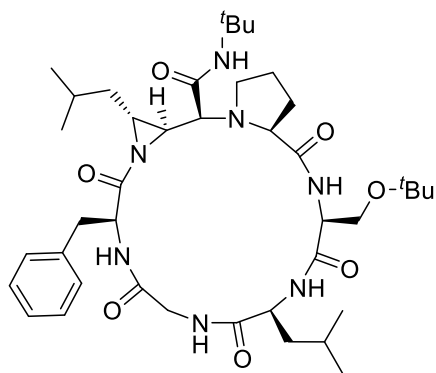

#### **dLeu[PS(*t*Bu)LGF] (19B<sup>b</sup>)**

The peptide was cyclized at 0.15 mmol scale. Following purification by flash chromatography (EtOAc  $\rightarrow$  35% MeOH), the pure fractions were pooled to afford 55.9 mg of the title compound in 49% overall yield. ESI MS  $[M+H]^+$  expected: 768.5, experimental: 768.5. ESI-TOF MS  $[M+H]^+$  expected: 768.5017, experimental: 768.5005.  $^1\text{H}$  NMR (DMSO- $d_6$ , 500 MHz)  $\delta$  8.61 (d,  $J = 6.7$  Hz, 1H), 8.14 (t,  $J = 6.1$  Hz, 1H), 8.03 (s, 1H), 7.65 (dd,  $J = 16.3, 9.0$  Hz, 2H), 7.29 – 7.12 (m, 5H), 4.63 (td,  $J = 9.5, 4.7$  Hz, 1H), 4.52 (dt,  $J = 8.9, 4.4$  Hz, 1H), 3.95 (dd,  $J = 16.7, 7.7$  Hz, 1H), 3.88 (s, 1H), 3.56 (ddd,  $J = 21.3, 9.5, 4.7$  Hz, 2H), 3.45 (dd,  $J = 9.2, 4.5$  Hz, 1H), 3.24 (dd,  $J = 16.7, 4.7$  Hz, 1H), 3.21 – 3.08 (m, 3H), 3.01 (dd,  $J = 6.1, 3.6$  Hz, 2H), 2.80 (d,  $J = 6.7$  Hz, 1H), 2.76 – 2.68 (m, 1H), 2.17 – 2.06 (m, 1H), 1.98 – 1.90 (m, 1H), 1.88 – 1.65 (m, 6H), 1.64 – 1.53 (m, 1H), 1.27 (s, 9H), 1.09 (d,  $J = 1.0$  Hz, 10H), 1.00 – 0.92 (m, 6H), 0.92 – 0.84 (m, 6H).

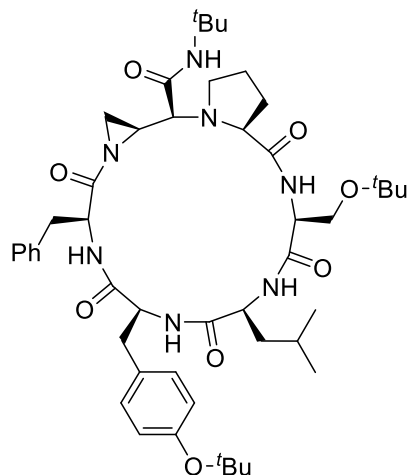

### c[PS(<sup>t</sup>Bu)LY(<sup>t</sup>Bu)F] (20B)

The peptide was cyclized at 0.15 mmol scale. Following purification by flash chromatography (EtOAc→MeOH), the pure fractions were pooled to afford 28.2 mg of the title compound in 22% overall yield. ESI MS [M+H]<sup>+</sup> expected: 874.5, experimental: 874.5. ESI-TOF MS [M+H]<sup>+</sup> expected: 874.5437, experimental: 874.5429. <sup>1</sup>H NMR (DMSO-*d*<sub>6</sub>, 500 MHz) δ 8.06 (d, *J* = 7.4 Hz, 1H), 8.00 (d, *J* = 9.0 Hz, 1H), 7.92 (m, 2H), 7.49 (s, 1H), 7.32 – 7.16 (m, 5H), 7.03 – 6.96 (m, 2H), 6.87 – 6.78 (m, 2H), 4.60 (td, *J* = 8.5, 6.5 Hz, 1H), 4.32 (dt, *J* = 9.2, 5.2 Hz, 1H), 4.02 – 3.94 (m, 1H), 3.69 (ddd, *J* = 11.4, 7.2, 4.6 Hz, 1H), 3.52 (dd, *J* = 9.1, 5.0 Hz, 1H), 3.44 (dd, *J* = 9.2, 5.4 Hz, 1H), 3.35 (d, *J* = 3.6 Hz, 1H), 3.10 (dd, *J* = 13.6, 6.4 Hz, 1H), 3.02 (td, *J* = 10.3, 4.0 Hz, 2H), 2.96 (ddd, *J* = 8.9, 5.8, 3.6 Hz, 1H), 2.92 – 2.83 (m, 1H), 2.80 (dd, *J* = 13.9, 5.5 Hz, 1H), 2.74 – 2.66 (m, 1H), 2.64 (d, *J* = 8.3 Hz, 1H), 2.29 (d, *J* = 6.1 Hz, 1H), 2.14 (d, *J* = 3.4 Hz, 1H), 2.04 – 1.99 (m, 1H), 1.82 – 1.64 (m, 3H), 1.54 (m, 2H), 1.26 (m, 19H), 1.12 (s, 9H), 0.86 (d, *J* = 6.6 Hz, 3H), 0.78 (d, *J* = 6.5 Hz, 3H).

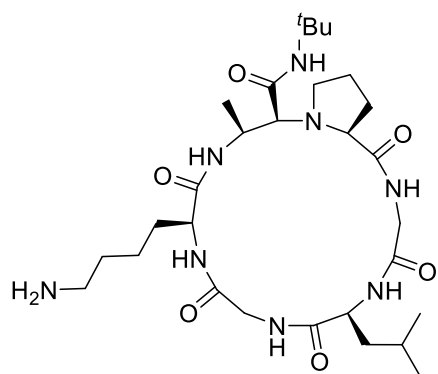

### c[PGLGK] (21B<sup>a</sup>)

The peptide was cyclized at 0.15 mmol scale with telescopic aziridine ring-opening. After cyclization, filtration, and deprotection 92.9 mg of peptide was recovered. Following purification by RP-HPLC SP 5 to 10, the pure fractions were pooled to afford 24.1 mg of the title compound in 26% overall yield. ESI MS [M+H]<sup>+</sup> expected: 609.4, experimental: 609.4; [M+2H]<sup>2+</sup> expected: 305.2, experimental: 305.2. ESI-TOF MS [M+2H]<sup>2+</sup> expected: 305.2078, experimental: 305.2088. LC/MS retention time 3.793 min. <sup>1</sup>H NMR (CD<sub>3</sub>OD, 400 MHz) δ 4.27 (ddd, *J* = 22.4, 12.1, 5.6 Hz, 4H), 4.08 – 3.95 (m, 2H), 3.84 – 3.75 (m, 1H), 3.59 (d, *J* = 15.8 Hz, 1H), 3.38 (dd, *J* =

8.8, 5.1 Hz, 1H), 3.17 – 3.02 (m, 3H), 2.93 (dd,  $J = 16.3, 8.8$  Hz, 3H), 2.13 – 1.94 (m, 2H), 1.84 – 1.60 (m, 10H), 1.52 – 1.38 (m, 3H), 1.34 (d,  $J = 9.3$  Hz, 12H), 1.30 (d,  $J = 6.7$  Hz, 3H), 0.97 (dd,  $J = 6.0, 4.8$  Hz, 6H).  $^1\text{H}$  NMR (DMSO- $d_6$ , 700 MHz)  $\delta$  9.07 (t,  $J = 5.2$  Hz, 1H), 8.50 – 8.36 (m, 1H), 8.13 (t,  $J = 6.3$  Hz, 1H), 7.55 (d,  $J = 7.6$  Hz, 1H), 7.23 (d,  $J = 9.0$  Hz, 1H), 6.45 (s, 1H), 4.32 (td,  $J = 8.2, 4.6$  Hz, 1H), 4.11 (td,  $J = 9.3, 6.6$  Hz, 1H), 4.04 – 3.96 (m, 1H), 3.76 (ddd,  $J = 14.6, 9.9, 4.8$  Hz, 2H), 3.66 (dd,  $J = 15.5, 7.0$  Hz, 1H), 3.52 – 3.46 (m, 1H), 3.25 (q,  $J = 8.0$  Hz, 1H), 3.13 (t,  $J = 7.7$  Hz, 1H), 2.90 (ddd,  $J = 8.9, 6.9, 4.1$  Hz, 1H), 2.83 (d,  $J = 9.5$  Hz, 1H), 2.73 (dq,  $J = 13.2, 7.2, 6.6$  Hz, 2H), 1.89 (m, 2H), 1.72 – 1.58 (m, 2H), 1.58 – 1.45 (m, 7H), 1.37 – 1.27 (m, 2H), 1.27 – 1.17 (m, 12H), 0.88 (dd,  $J = 8.1, 4.0$  Hz, 6H).  $^{13}\text{C}$  NMR (DMSO- $d_6$ , 126 MHz)  $\delta$  174.1, 173.3, 169.9, 169.7, 169.2, 169.1, 66.1, 64.8, 52.7, 50.8, 50.5, 46.3, 44.9, 43.9, 43.2, 41.9, 38.5, 29.5, 29.2, 28.1, 26.9, 24.3, 23.2, 23.1, 22.6, 22.1, 18.8.

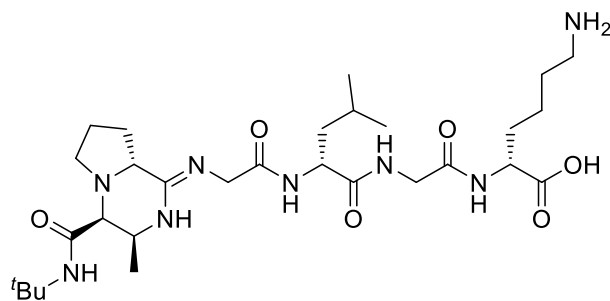

**am\*[PGIGk] (22D<sup>a</sup>)**

The peptide was cyclized at 0.15 mmol scale with telescopic aziridine ring-opening. After cyclization, filtration, and deprotection 63.1 mg of peptide was recovered. Following purification by RP-HPLC SP 5 to 15, the pure fractions were pooled to afford 7.9 mg of the title compound in 8.6% overall yield. ESI MS  $[\text{M}+\text{H}]^+$  expected: 609.4, experimental: 609.4;  $[\text{M}+2\text{H}]^{2+}$  expected: 305.2, experimental: 305.2. ESI-TOF MS  $[\text{M}+2\text{H}]^{2+}$  expected: 305.2078, experimental: 305.2089. LC/MS retention time 3.899 min.  $^1\text{H}$  NMR (DMSO- $d_6$ , 500 MHz)  $\delta$  8.83 (s, 1H), 8.60 (d,  $J = 8.9$  Hz, 1H), 7.38 (d,  $J = 6.2$  Hz, 1H), 7.33 (s, 1H), 4.40 (q,  $J = 7.9$  Hz, 1H), 4.13 – 3.97 (m, 3H), 3.91 (d,  $J = 16.8$  Hz, 1H), 3.75 (dd,  $J = 16.8, 6.2$  Hz, 2H), 3.43 (dd,  $J = 16.5, 5.7$  Hz, 1H), 3.19 (s, 1H), 2.97 (d,  $J = 7.9$  Hz, 1H), 2.70 (t,  $J = 7.7$  Hz, 2H), 2.58 (s, 1H), 2.41 – 2.28 (m, 1H), 1.82 – 1.61 (m, 4H), 1.48 (dq,  $J = 19.4, 7.9, 7.3$  Hz, 6H), 1.24 (d,  $J = 8.2$  Hz, 11H), 1.06 (d,  $J = 6.6$  Hz, 3H), 0.84 (dd,  $J = 18.9, 6.3$  Hz, 6H).  $^{13}\text{C}$  NMR (DMSO- $d_6$ , 126 MHz)  $\delta$  173.7, 172.1, 168.3, 167.3, 166.7, 164.4, 55.1, 53.7, 53.2, 51.1, 50.2, 47.0, 44.0, 42.4, 40.4, 38.8, 31.5, 29.9, 28.3, 27.0, 24.2, 23.2, 22.7, 21.9, 21.7, 16.2.

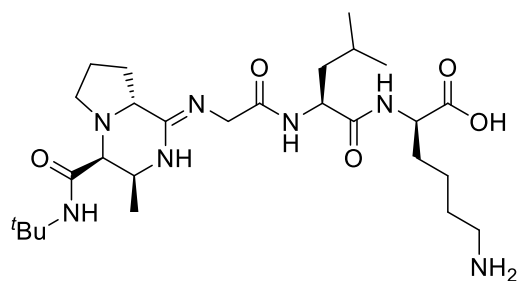

**am\*[PGLK] (23D<sup>a</sup>)**

The peptide was cyclized at 0.15 mmol scale with telescopic aziridine ring-opening. After cyclization, filtration, and deprotection 64.5 mg of peptide was recovered. Following purification by RP-HPLC SP 5 to 15, the pure fractions were pooled to afford 8.1 mg of the title compound in 9.8% overall yield. ESI MS  $[M+H]^+$  expected: 552.4, experimental: 552.4;  $[M+2H]^{2+}$  expected: 276.7, experimental: 276.6. ESI MS  $[M+H]^+$  expected: 552.3868, experimental: 552.3862. LC/MS retention time 3.848 min.  $^1H$  NMR (DMSO- $d_6$ , 700 MHz)  $\delta$  8.52 (s, 1H), 7.64 (s, 1H), 7.56 – 7.47 (m, 1H), 4.17 (q,  $J$  = 7.6 Hz, 1H), 4.04 (d,  $J$  = 17.6 Hz, 1H), 3.96 (d,  $J$  = 14.0 Hz, 2H), 3.88 – 3.79 (m, 2H), 3.29 (d,  $J$  = 7.5 Hz, 1H), 2.94 (d,  $J$  = 7.4 Hz, 1H), 2.76 – 2.65 (m, 3H), 2.34 (d,  $J$  = 14.6 Hz, 1H), 1.80 – 1.75 (m, 1H), 1.65 (m, 4H), 1.50 (m, 5H), 1.25 (d,  $J$  = 2.9 Hz, 11H), 1.22 – 1.17 (m, 3H), 0.91 – 0.80 (m, 6H).  $^{13}C$  NMR (DMSO- $d_6$ , 126 MHz)  $\delta$  174.2, 171.4, 169.3, 168.5, 167.5, 61.0, 54.8, 53.5, 52.6, 52.3, 50.2, 43.9, 40.7, 38.7, 31.9, 30.8, 28.4, 26.9, 24.3, 23.2, 23.2, 22.3, 21.4, 16.3.

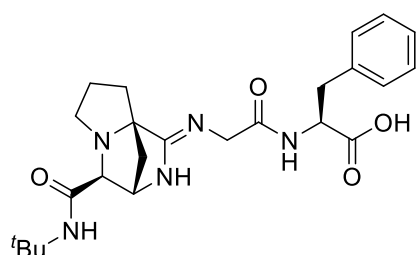

#### br[PGF] (24C)

The peptide was cyclized at 0.45 mmol scale. Following purification by flash chromatography (EtOAc  $\rightarrow$  MeOH), the pure fractions were pooled to afford 15.7 mg of the title compound in 8% overall yield. ESI MS  $[M+H]^+$  expected: 456.4, experimental: 456.4.  $^1H$  NMR (DMSO- $d_6$ , 500 MHz)  $\delta$  8.07 – 7.82 (m, 2H), 7.50 (s, 1H), 7.22 – 7.09 (m, 5H), 4.23 (q,  $J$  = 6.4 Hz, 1H), 3.95 (s, 1H), 3.74 – 3.52 (m, 2H), 3.06 (dd,  $J$  = 13.5, 5.1 Hz, 1H), 2.92 (dd,  $J$  = 13.5, 6.5 Hz, 1H), 2.79 (s, 1H), 2.66 (dt,  $J$  = 8.2, 6.3 Hz, 1H), 2.40 – 2.26 (m, 1H), 2.17 – 1.96 (m, 3H), 1.82 (d,  $J$  = 8.9 Hz, 1H), 1.73 – 1.60 (m, 1H), 1.55 (dd,  $J$  = 9.2, 1.9 Hz, 1H), 1.26 (s, 9H).  $^{13}C$  NMR (DMSO- $d_6$ , 126 MHz)  $\delta$  173.4, 168.6, 168.1, 165.1, 138.5, 129.4, 127.8, 125.8, 76.6, 66.1, 63.8, 54.6, 50.1, 48.2, 44.5, 40.7, 37.4, 35.8, 28.4, 26.8, 20.4.

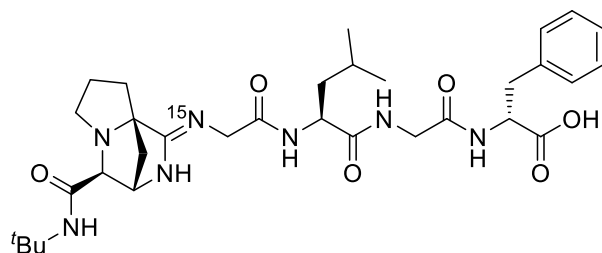

#### br[p $^{15}N$ GLGf] – $^{15}N$ -labelled (25C)

The peptide was cyclized at 0.06 mmol scale and ring-opened with thiobenzoic acid (0.13 mmol) for one hour prior to solvent evaporation. Following purification by RP-HPLC SP 20 to 40, the pure fractions were pooled to afford 5.8 mg of the title compound in 15% overall yield. ESI-TOF MS  $[M+H]^+$  expected: 627.3631, experimental: 627.3635.  $^1H$  NMR (DMSO- $d_6$ , 700 MHz)  $\delta$  8.80 (s, 1H), 8.22 (d,  $J$  = 9.0 Hz, 1H), 7.54 (s, 1H), 7.26 (d,  $J$  = 5.5 Hz, 1H), 7.22 – 7.05 (m, 5H), 4.49 – 4.39 (m, 1H), 4.16 (s, 1H), 3.93 – 3.75 (m, 3H), 3.63 (dd,  $J$  = 16.6, 6.0 Hz, 1H), 3.47 – 3.36 (m, 1H),

3.06 (ddd,  $J = 43.5, 13.2, 4.7$  Hz, 2H), 2.80 – 2.70 (m, 2H), 2.60 (d,  $J = 9.6$  Hz, 1H), 2.14 (d,  $J = 9.2$  Hz, 3H), 1.89 (d,  $J = 9.3$  Hz, 1H), 1.82 (d,  $J = 11.0$  Hz, 1H), 1.71 (d,  $J = 9.3$  Hz, 1H), 1.51 – 1.33 (m, 2H), 1.30 (s, 10H), 0.84 (dd,  $J = 21.2, 6.5$  Hz, 6H).  $^1\text{H}$  NMR (DMSO- $d_6$  + formic acid, 700 MHz)  $\delta$  8.42 (t,  $J = 5.9$  Hz, 1H), 8.31 (d,  $J = 8.4$  Hz, 1H), 7.78 (d,  $J = 7.0$  Hz, 1H), 7.66 (s, 1H), 7.27 – 7.12 (m, 5H), 4.35 (td,  $J = 8.9, 5.7$  Hz, 1H), 4.27 – 4.19 (m, 2H), 3.99 – 3.89 (m, 2H), 3.61 (qd,  $J = 16.7, 5.9$  Hz, 2H), 3.05 (dd,  $J = 13.6, 5.2$  Hz, 1H), 3.00 (s, 1H), 2.91 (dd,  $J = 13.6, 7.3$  Hz, 1H), 2.75 – 2.63 (m, 2H), 2.22 – 2.15 (m, 1H), 2.14 – 2.01 (m, 2H), 1.92 – 1.81 (m, 1H), 1.75 (dd,  $J = 9.7, 2.0$  Hz, 1H), 1.52 (dt,  $J = 13.4, 6.9$  Hz, 1H), 1.46 – 1.34 (m, 2H), 1.26 (s, 10H), 0.83 (dd,  $J = 26.2, 6.6$  Hz, 6H).  $^{15}\text{N}$  NMR (DMSO- $d_6$  + formic acid, 500 MHz)  $\delta$  102.5.

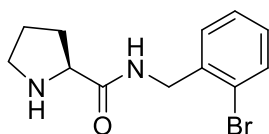

**(S)-N-(4-bromobenzyl)pyrrolidine-2-carboxamide (26)**

Fmoc-Pro-OH (1.43 g, 4.0 mmol) in a 50 mL RB flask was dissolved in THF (20 mL) and triethylamine (0.56 mL, 4.0 mmol) was added. The reaction was cooled by stirring over ice and then ethylchloroformate (0.38 mL, 4.0 mmol) was added dropwise over 15 minutes. Afterwards, the mixture was left to stir for 25 minutes and then 2-bromobenzylamine was added (0.51 mL, 4.0 mmol). The reaction was allowed to stir for an additional thirty minutes on ice and then left to stir at room temperature for 16 hours. The reaction was then diluted with EtOAc and filtered. After evaporation of solvent the mixture was purified by flash column chromatography (Hex  $\rightarrow$  EtOAc).  $R_f$  (DCM) = 0.33. Pure fractions were concentrated to a white powder which was immediately dissolved in MeCN (40 mL) and piperidine (0.60 mL) was added. The reaction was allowed to stir at room temperature for two hours before being evaporated and purified by flash column chromatography (Hex  $\rightarrow$  EtOAc  $\rightarrow$  MeOH, all buffered with 1% triethylamine). The final compound was isolated as a yellow oil in 62% overall yield. ESI-TOF MS  $[\text{M}+\text{H}]^+$  expected: 283.0441, experimental: 283.0451.  $^1\text{H}$  NMR (DMSO- $d_6$ , 500 MHz)  $\delta$  8.45 (t,  $J = 6.2$  Hz, 1H), 7.58 (dd,  $J = 7.9, 1.3$  Hz, 1H), 7.34 (td,  $J = 7.5, 1.3$  Hz, 1H), 7.22 (dd,  $J = 7.7, 1.7$  Hz, 1H), 7.18 (td,  $J = 7.6, 1.8$  Hz, 1H), 4.28 (d,  $J = 6.2$  Hz, 2H), 3.59 (dd,  $J = 8.8, 5.5$  Hz, 1H), 2.85 (dt,  $J = 10.1, 6.7$  Hz, 1H), 2.79 (dt,  $J = 10.1, 6.4$  Hz, 1H), 1.96 (ddt,  $J = 12.2, 8.5, 7.0$  Hz, 1H), 1.70 (dtd,  $J = 12.4, 7.1, 5.5$  Hz, 1H), 1.64 – 1.56 (m, 2H).  $^{13}\text{C}$  NMR (DMSO- $d_6$ , 126 MHz)  $\delta$  174.7, 138.0, 132.3, 128.8, 128.4, 127.7, 122.3, 60.3, 46.8, 42.3, 30.5, 25.8.

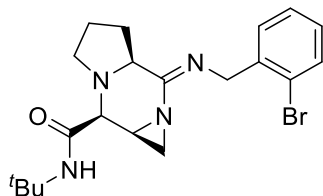

**(3aS,8S,8aS,Z)-3-((2-bromobenzyl)imino)-N-(tert-butyl)hexahydro-1H,3H-azirino[1,2-a]pyrrolo[1,2-d]pyrazine-8-carboxamide (27)**

In a two-dram vial equipped with a magnetic stirring bar were added **26** (50 mg, 0.176 mmol), **3** (530  $\mu\text{L}$ , 0.2 M solution in TFE, 0.106 mmol), DCM (1000  $\mu\text{L}$ ) and  $^t\text{BuNC}$  (39.8  $\mu\text{L}$ , 0.36 mmol)

and stirred for five hours. The mixture was then concentrated by N<sub>2</sub> purge and purified by silica gel chromatography (Hex → EtOAc). Pure fractions were concentrated to an off-white powder (7.0 mg, 10% yield). ESI-TOF MS [M+H]<sup>+</sup> expected: 419.1441, experimental: 419.1441. <sup>1</sup>H NMR (CDCl<sub>3</sub>, 500 MHz) δ 7.63 (ddt, *J* = 7.7, 1.7, 0.9 Hz, 1H), 7.54 (dd, *J* = 8.0, 1.3 Hz, 1H), 7.31 (td, *J* = 7.5, 1.3 Hz, 1H), 7.14 – 7.06 (m, 1H), 6.28 (s, 1H), 4.76 (d, *J* = 17.5 Hz, 1H), 4.58 (d, *J* = 18.1 Hz, 1H), 3.34 (d, *J* = 5.6 Hz, 1H), 3.16 (dt, *J* = 9.9, 5.1 Hz, 1H), 2.95 – 2.92 (m, 1H), 2.87 (ddt, *J* = 9.1, 7.4, 1.5 Hz, 1H), 2.34 (dd, *J* = 5.1, 1.0 Hz, 1H), 2.29 – 2.12 (m, 2H), 2.03 – 1.95 (m, 1H), 1.87 – 1.79 (m, 3H), 1.34 (s, 9H). <sup>13</sup>C NMR (CDCl<sub>3</sub>, 126 MHz) δ 169.5, 163.0, 140.0, 132.4, 129.3, 128.0, 127.4, 123.6, 65.6, 62.4, 54.5, 51.4, 51.1, 37.2, 29.9, 29.0, 24.3, 21.5.

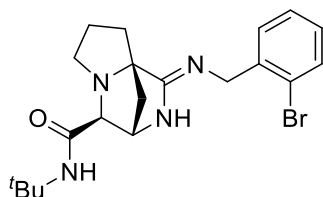

**(3S,4S,8aS,Z)-1-((2-bromobenzyl)imino)-N-(tert-butyl)hexahydro-6H-3,8a-methanopyrrolo[1,2-a]pyrazine-4-carboxamide (28)**

In a two-dram vial equipped with a magnetic stirring bar were added **26** (25 mg, 0.088 mmol), **3** (265 μL, 0.2 M solution in TFE, 0.053 mmol), HFIP (500 μL) and <sup>t</sup>BuNC (19.9 μL, 0.18 mmol) and stirred for five hours. The mixture was then concentrated by N<sub>2</sub> purge and purified by silica gel chromatography (Hex → EtOAc → MeOH). Pure fractions were concentrated to an off-white powder (9.9 mg, 27% yield). Crystals of **28** formed spontaneously upon concentration of pure fractions from Hex/EtOAc. ESI-TOF MS [M+H]<sup>+</sup> expected: 419.1441, experimental: 419.1435. <sup>1</sup>H NMR (CDCl<sub>3</sub> + 0.3% formic acid, 700 MHz) δ 7.58 – 7.56 (m, 1H), 7.45 – 7.43 (m, 1H), 7.32 (td, *J* = 7.5, 1.2 Hz, 1H), 7.22 (td, *J* = 7.7, 1.6 Hz, 1H), 7.17 – 7.12 (m, 1H), 4.72 – 4.60 (m, 2H), 4.51 (s, 1H), 3.43 – 3.38 (m, 1H), 3.06 – 3.00 (m, 1H), 2.71 (d, *J* = 8.1 Hz, 1H), 2.44 – 2.37 (m, 1H), 2.35 – 2.28 (m, 2H), 2.22 (d, *J* = 11.5 Hz, 1H), 2.04 – 1.97 (m, 2H), 1.35 (s, 9H). <sup>13</sup>C NMR (CDCl<sub>3</sub> + 0.3% formic acid, 126 MHz) δ 168.0, 167.3, 133.3, 131.3, 130.7, 128.3, 124.0, 79.5, 65.7, 65.2, 52.0, 48.3, 45.3, 43.0, 28.6, 26.7, 20.9.

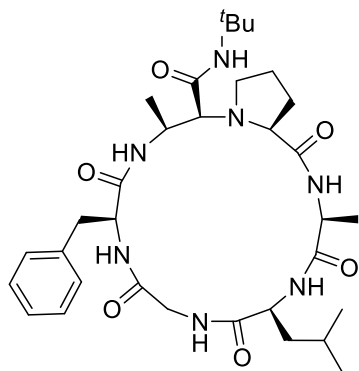

**c\*[PALGF] (S1)**

The peptide was cyclized at 0.10 mmol scale with telescopic aziridine ring-opening. Following purification by RP-HPLC SP 20 to 60, the pure fractions were pooled to afford 14.8 mg of the

title compound in 22% overall yield ESI MS  $[M+H]^+$  expected: 642.4, experimental: 642.4. ESI-TOF MS  $[M+H]^+$  expected: 642.3974, experimental: 642.3974. LC/MS retention time 6.550 min.  $^1\text{H}$  NMR ( $\text{DMSO-}d_6$ , 500 MHz)  $\delta$  8.87 (t,  $J = 4.9$  Hz, 1H), 8.45 (d,  $J = 8.4$  Hz, 1H), 7.83 (d,  $J = 7.7$  Hz, 1H), 7.47 (d,  $J = 8.6$  Hz, 1H), 7.41 (d,  $J = 7.5$  Hz, 1H), 7.28-7.17 (m, 5H), 6.58 (s, 1H), 4.27-4.20 (m, 3H), 4.15 (ddt,  $J = 15.6, 8.7, 5.7$  Hz, 1H), 3.68 (dd,  $J = 15.3, 4.3$  Hz, 1H), 3.41 (dd,  $J = 15.1, 5.6$  Hz, 1H), 3.36 (m, 1H), 3.29 (m, 1H), 3.18 (t,  $J = 7.4$  Hz, 1H), 2.96 (dt,  $J = 7.8, 6.2$  Hz, 1H), 2.82-2.77 (m, 2H), 1.97 (m, 1H), 1.73 (m, 1H), 1.67 (m, 2H), 1.58 (t,  $J = 6.6$  Hz, 2H), 1.52 (m, 1H), 1.30 (d,  $J = 5.0$  Hz, 3H), 1.28 (d,  $J = 5.3$  Hz, 3H), 1.22 (s, 9H), 0.89 (t,  $J = 6.3$  Hz, 6H).  $^{13}\text{C}$  NMR ( $\text{DMSO-}d_6$ , 126 MHz)  $\delta$  173.8, 172.9, 172.3, 170.2, 169.5, 168.4, 138.5, 128.8, 128.3, 126.2, 66.2, 65.2, 54.9, 50.7, 50.5, 49.6, 46.9, 45.3, 43.7, 41.0, 35.4, 30.0, 28.2, 24.3, 23.5, 23.1, 22.0, 18.4, 17.8.

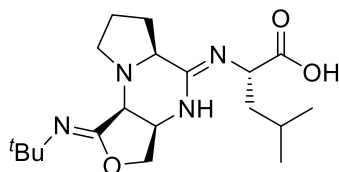

### S9

The dipeptide was cyclized at 9.4 mmol scale. Following purification by flash chromatography ( $\text{EtOAc} \rightarrow \text{MeOH}$ ), the pure fractions were pooled to afford 725 mg of the title compound in 21% overall yield. ESI MS  $[M+H]^+$  expected: 365.3, experimental: 365.3.  $^1\text{H}$  NMR ( $\text{DMSO-}d_6$ , 500 MHz)  $\delta$  4.48 (t,  $J = 7.7$  Hz, 1H), 4.16 – 4.06 (m, 1H), 3.99 – 3.92 (m, 1H), 3.70 (dd,  $J = 9.4, 7.7$  Hz, 1H), 3.25 – 3.17 (m, 1H), 2.98 (d,  $J = 5.9$  Hz, 1H), 2.84 – 2.76 (m, 1H), 2.25 (tt,  $J = 6.8, 4.9$  Hz, 1H), 2.20 (s, 1H), 1.81 – 1.69 (m, 2H), 1.68 – 1.48 (m, 4H), 1.28 – 1.21 (m, 1H), 1.18 (d,  $J = 5.9$  Hz, 9H), 0.90 – 0.82 (m, 6H).  $^{13}\text{C}$  NMR ( $\text{DMSO-}d_6$ , 126 MHz)  $\delta$  172.7, 160.7, 156.0, 74.0, 61.4, 59.2, 55.1, 54.0, 53.0, 50.3, 39.2, 28.3, 25.6, 24.5, 22.9, 21.9, 20.3.

## References

1. S. Zaretsky, S. Adachi, B. H. Rotstein, J. L. Hickey, C. C. G. Scully, J. D. St Denis, R. Courtemanche, J. C. Y. Yu, B. K. W. Chung, and A. K. Yudin, *J. Org. Chem.*, 2014, **79**, 9948–9957.
2. B. Rotstein and A. Yudin, *Synthesis*, 2012, **44**, 2851–2858.
3. B. H. Rotstein, V. Rai, R. Hili, and A. K. Yudin, *Nat. Protoc.*, 2010, **5**, 1813–22.
4. R. Hili and A. K. Yudin, *J. Am. Chem. Soc.*, 2006, **128**, 14772–3.
5. S. Zaretsky, C. C. G. Scully, A. J. Lough, and A. K. Yudin, *Chem. Eur. J.*, 2013, **19**, 17668–72.
6. R. Hili, V. Rai, and A. K. Yudin, *J. Am. Chem. Soc.*, 2010, **132**, 2889–91.



# NMR Spectra

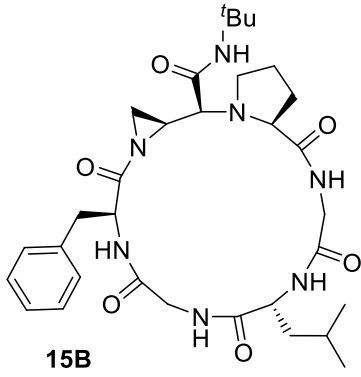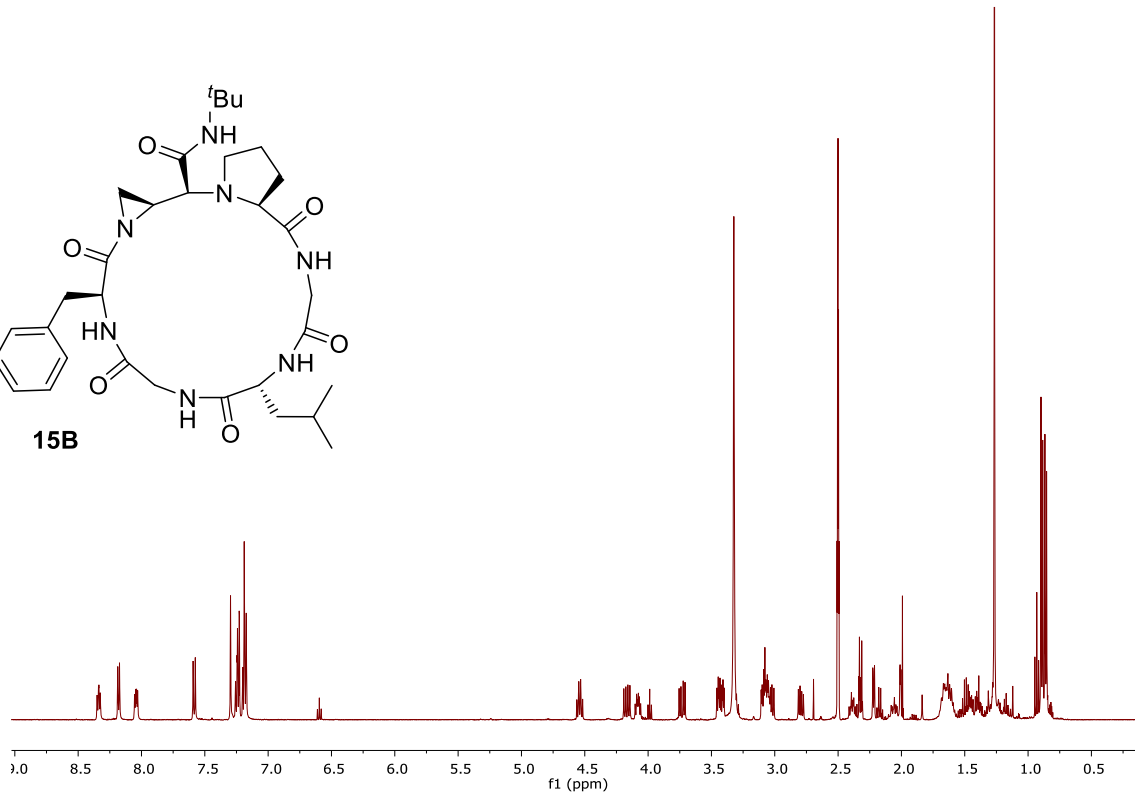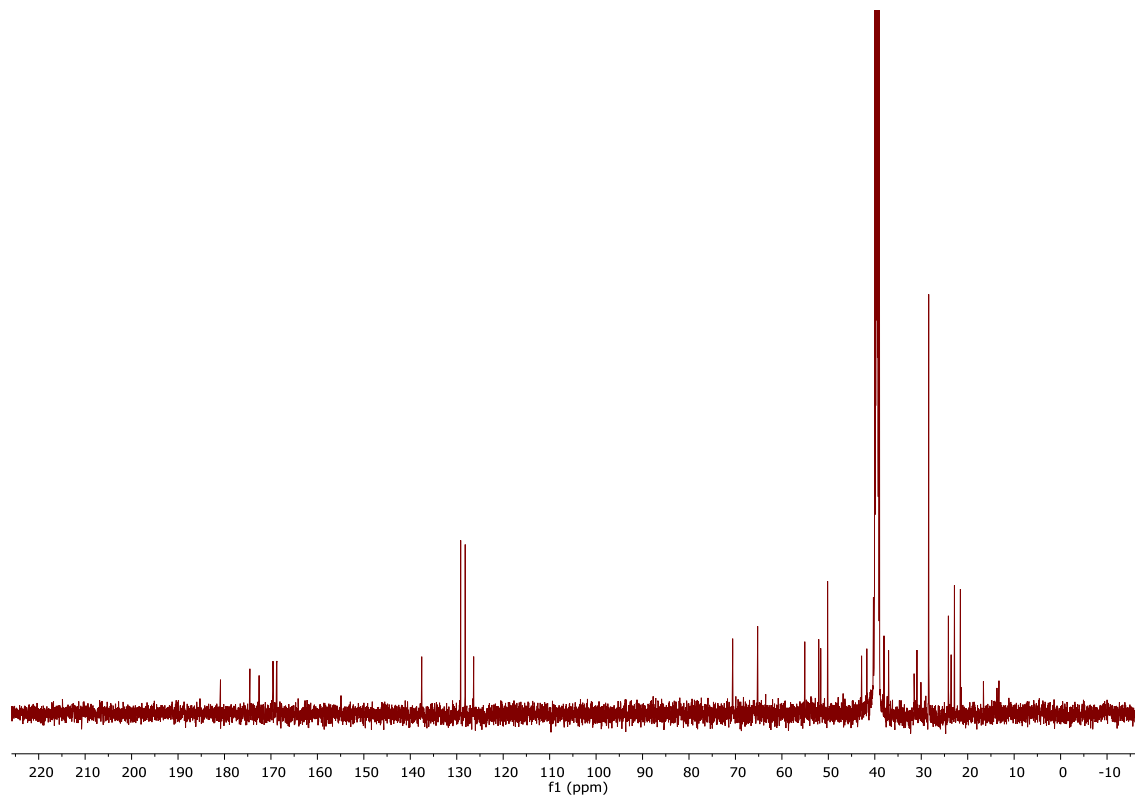

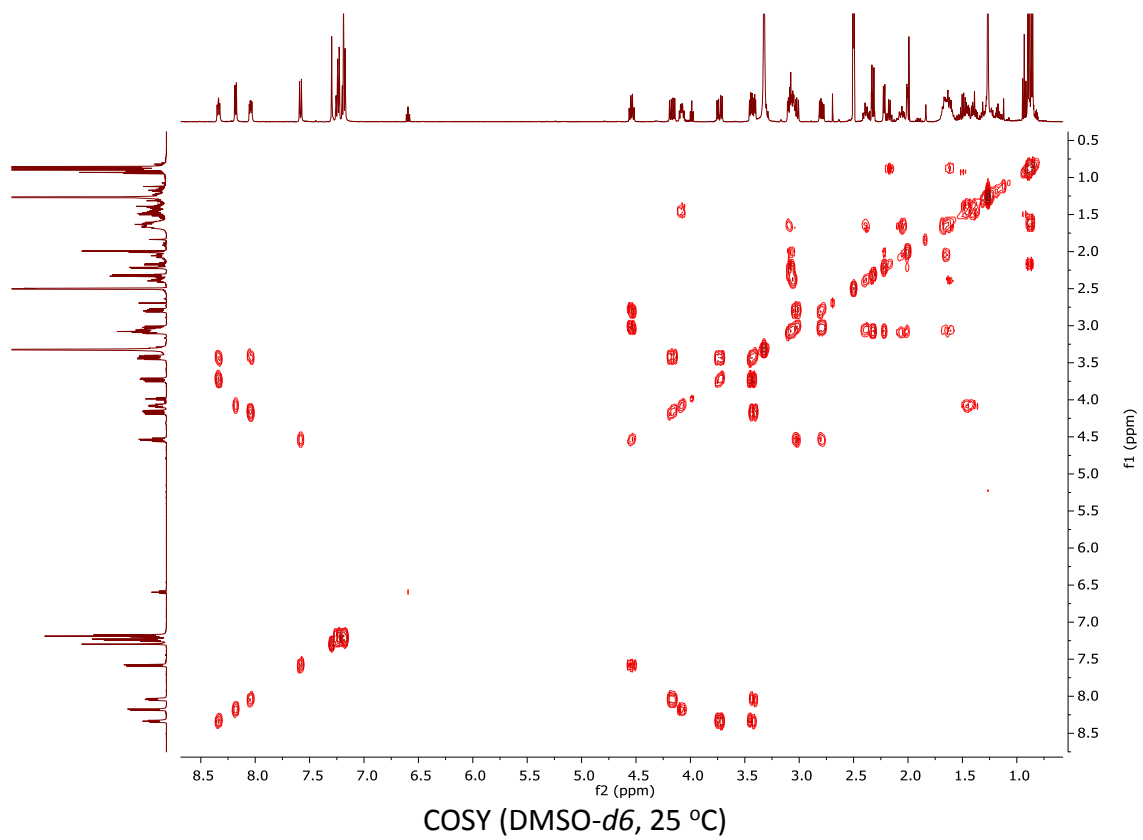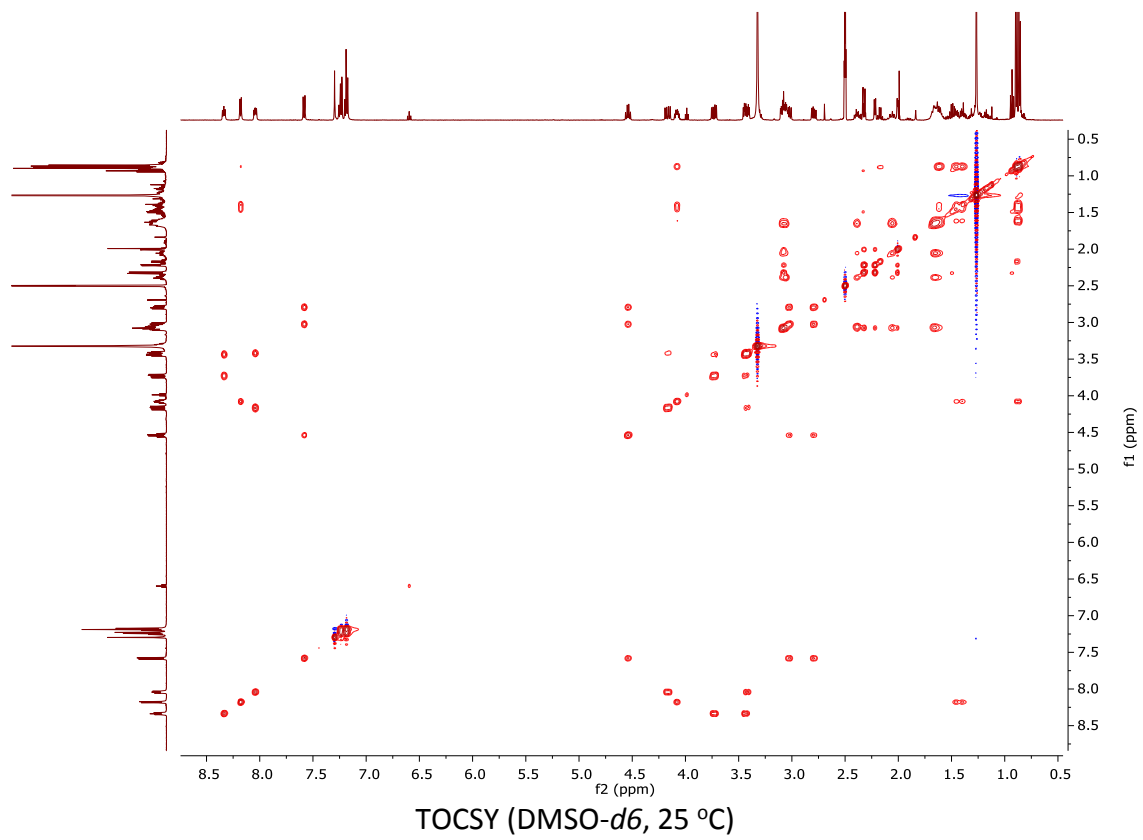

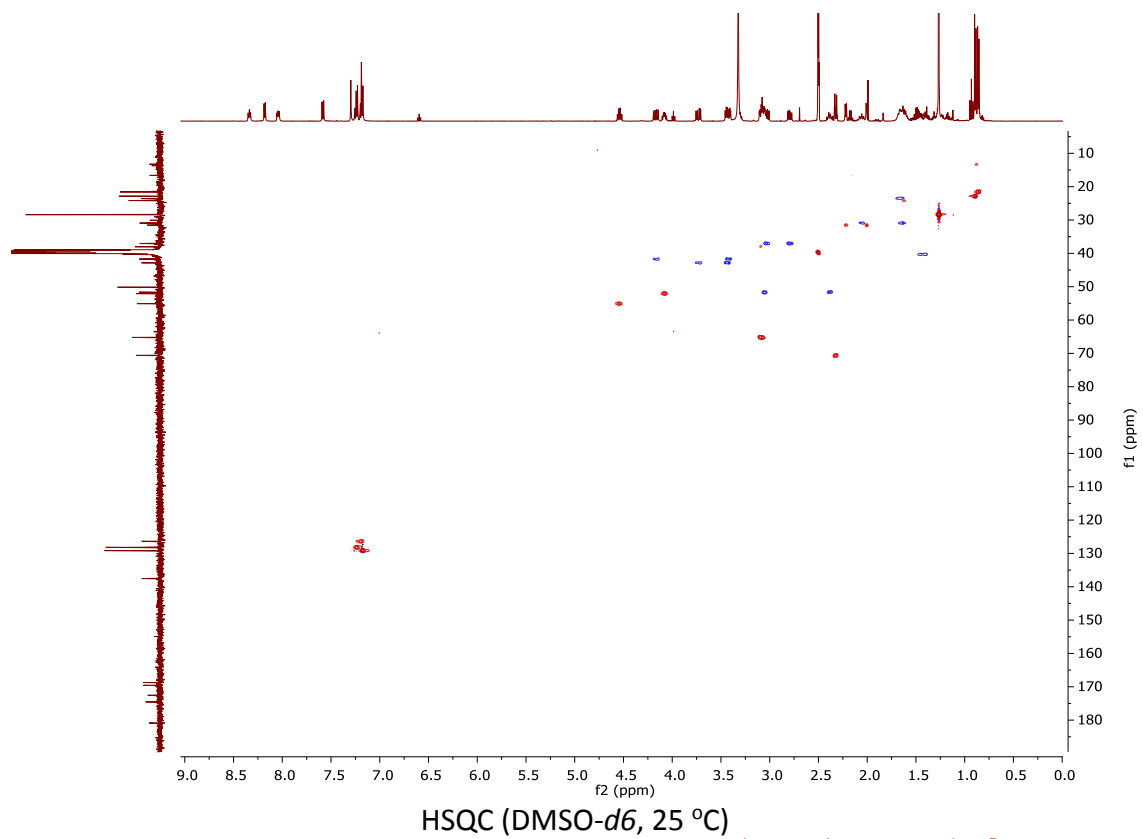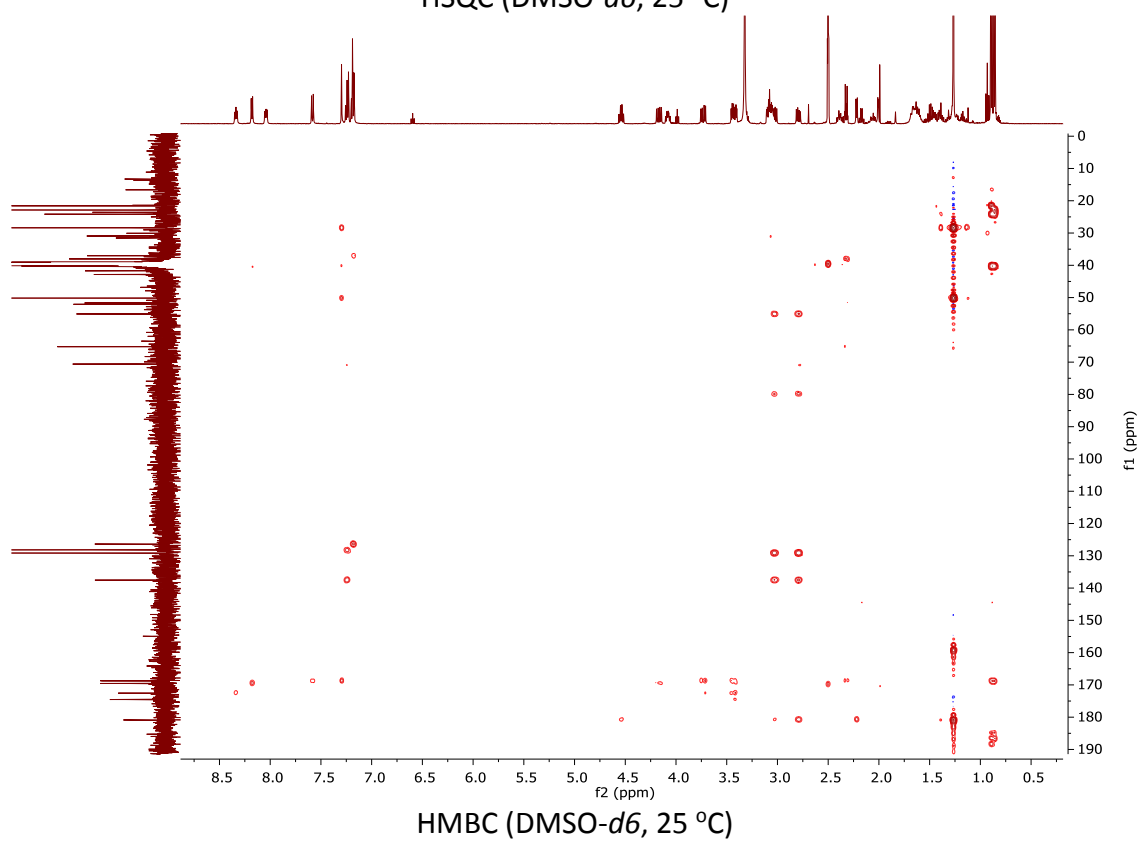



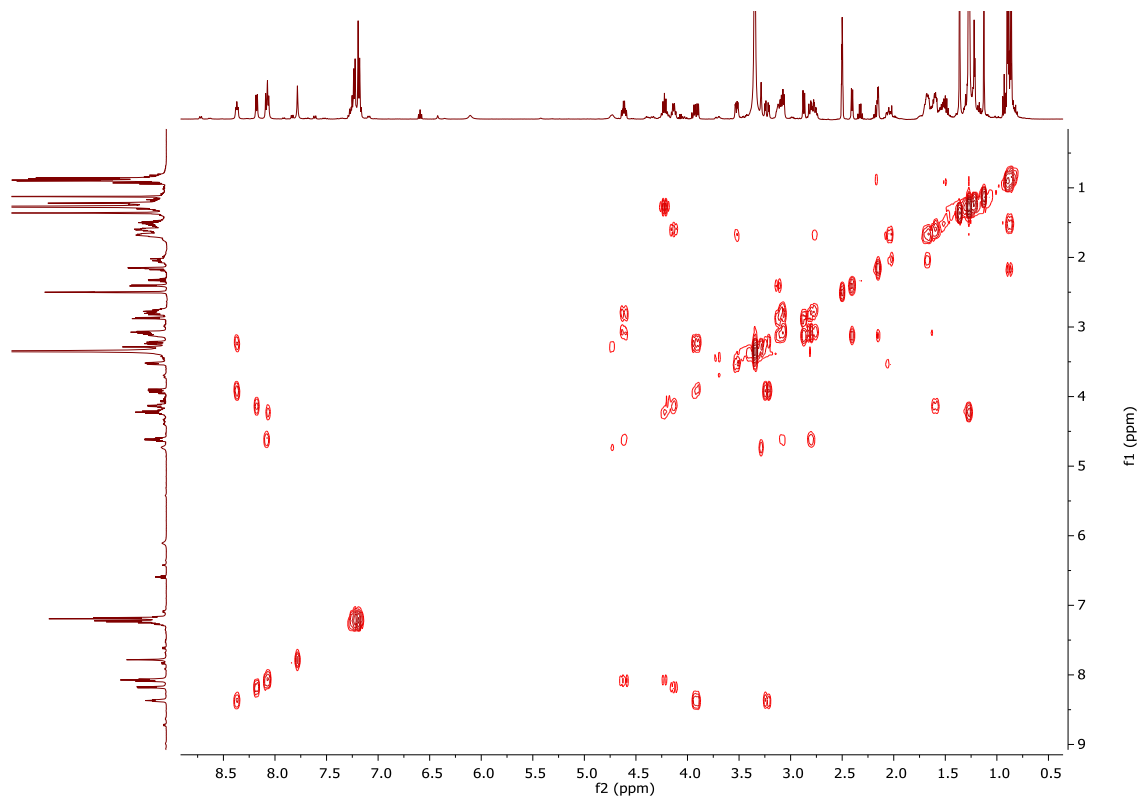

COSY (DMSO-*d*<sub>6</sub>, 25 °C)

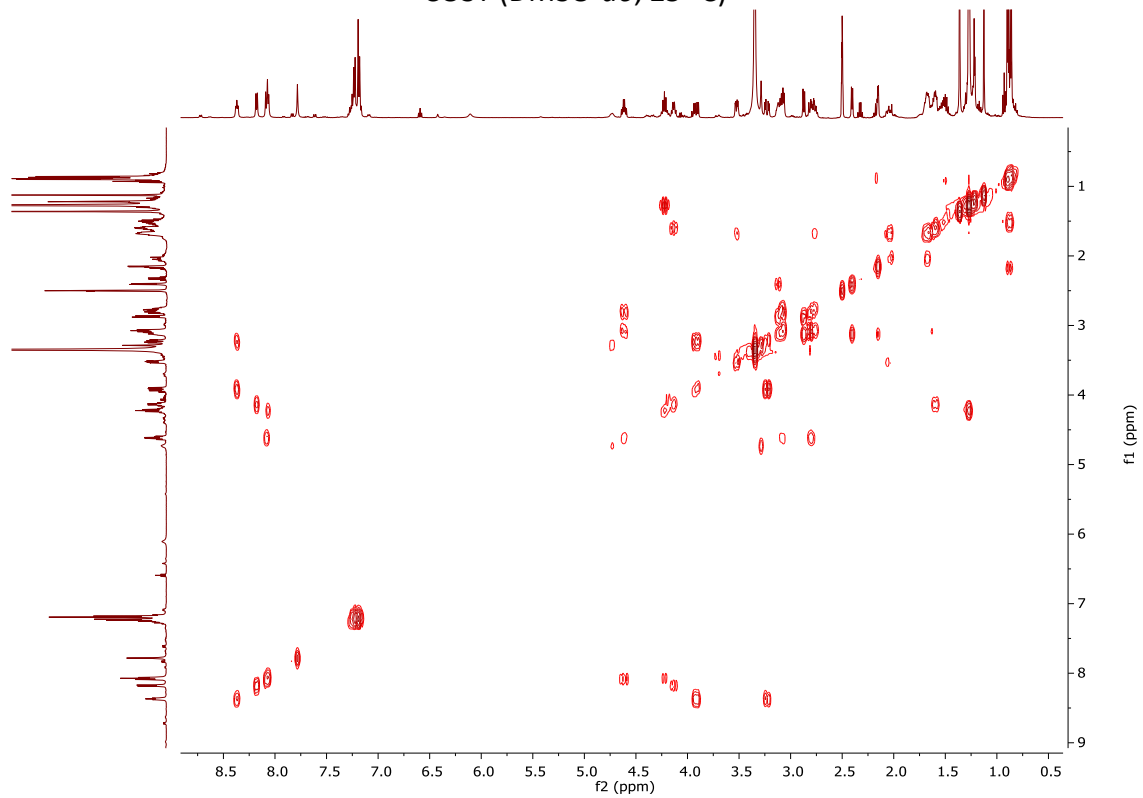

TOCSY (DMSO-*d*<sub>6</sub>, 25 °C)

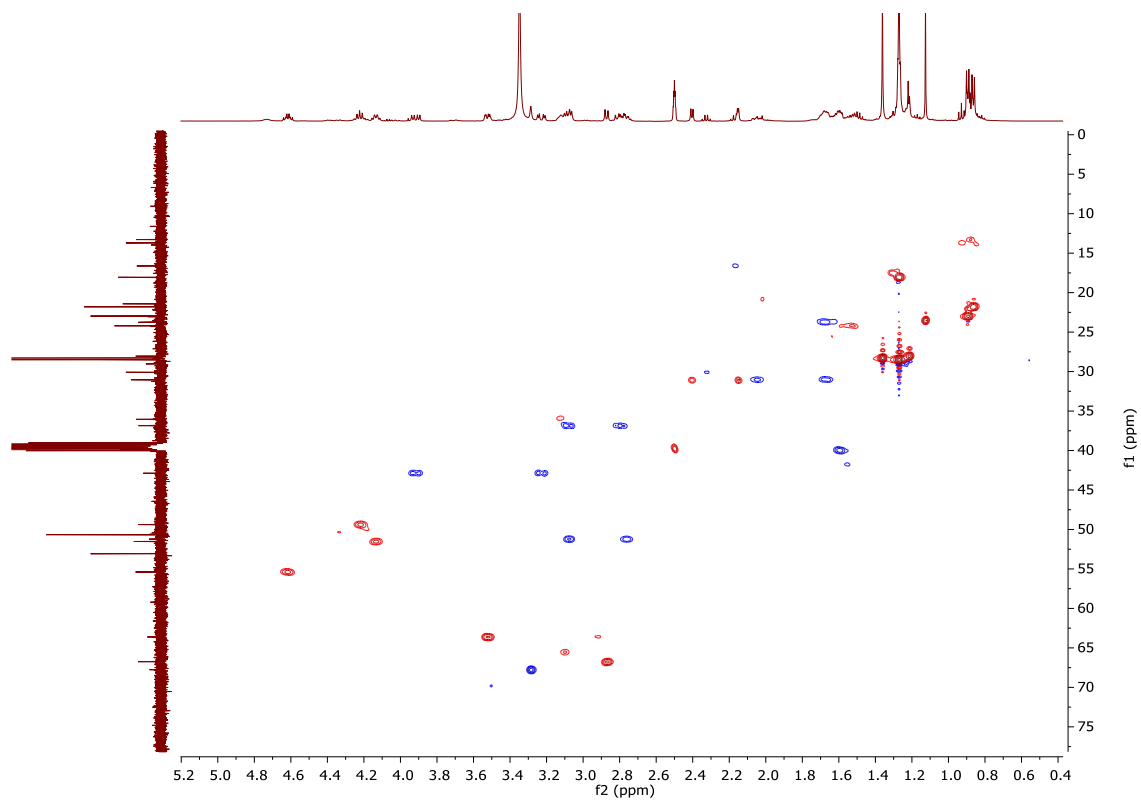

HSQC (DMSO-*d*<sub>6</sub>, 25 °C)

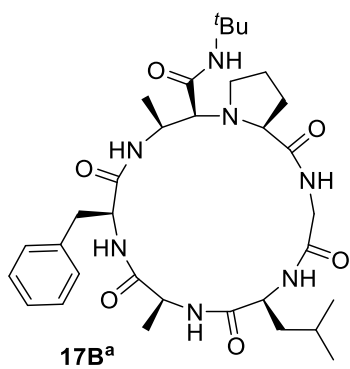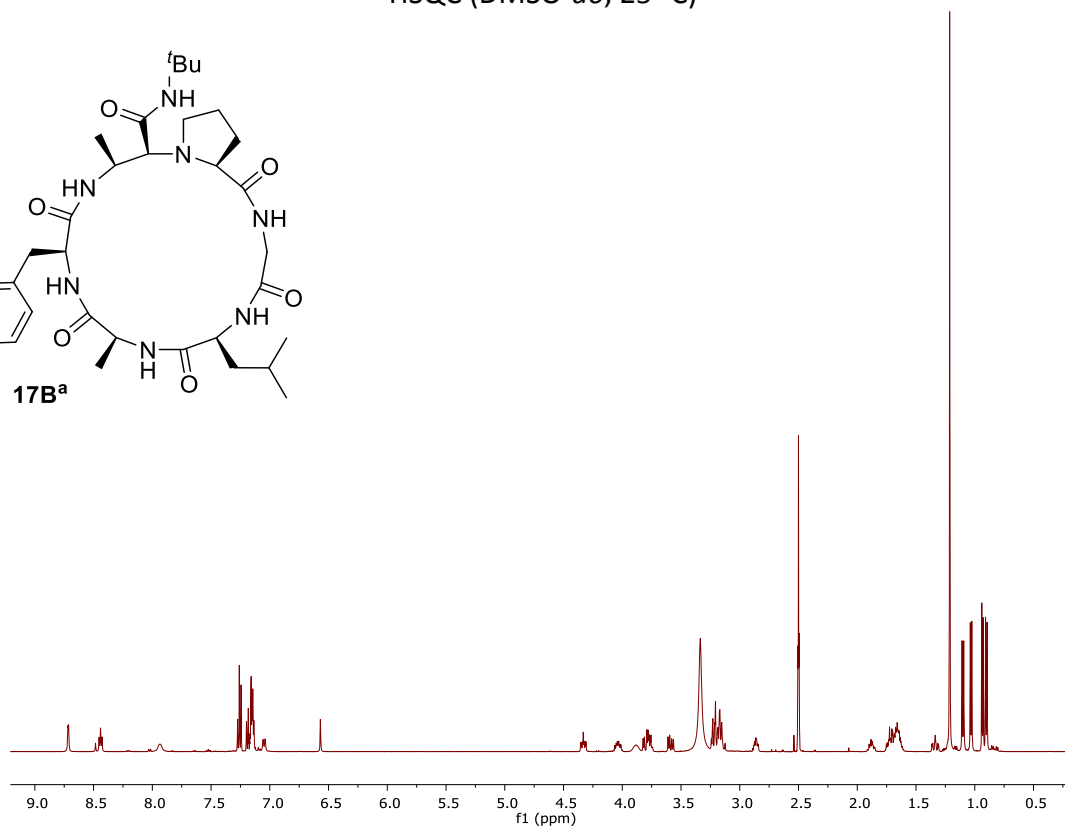

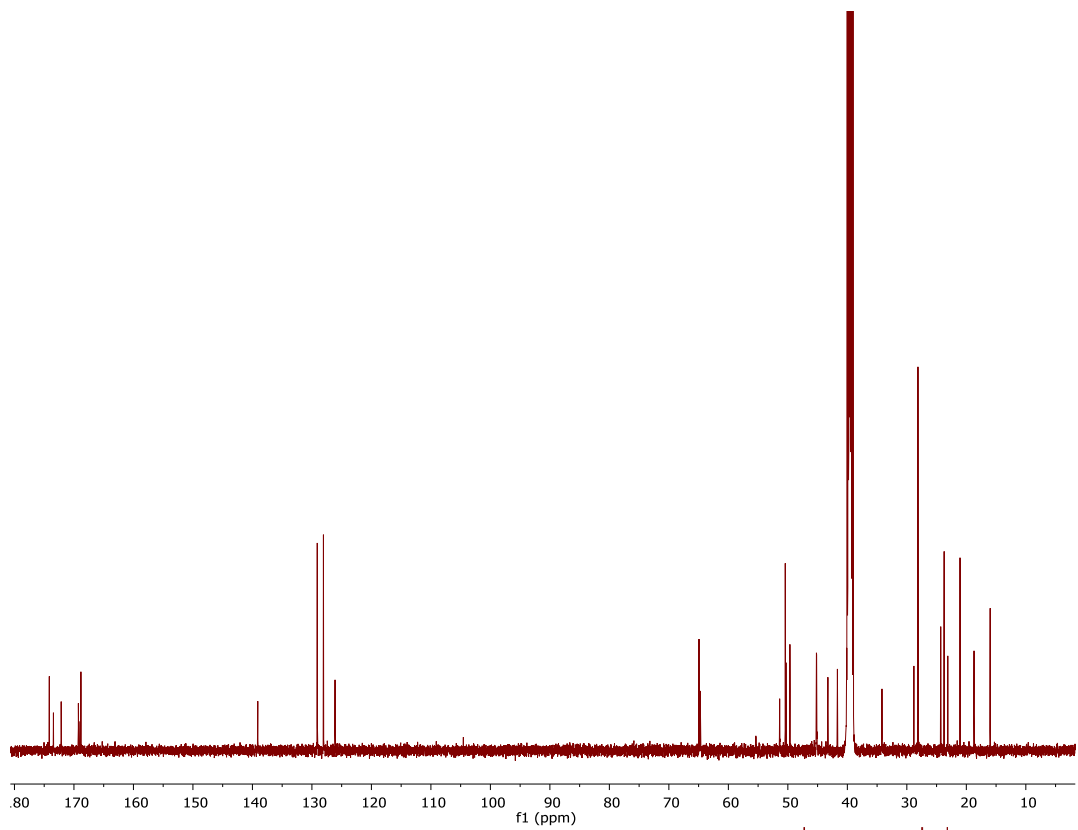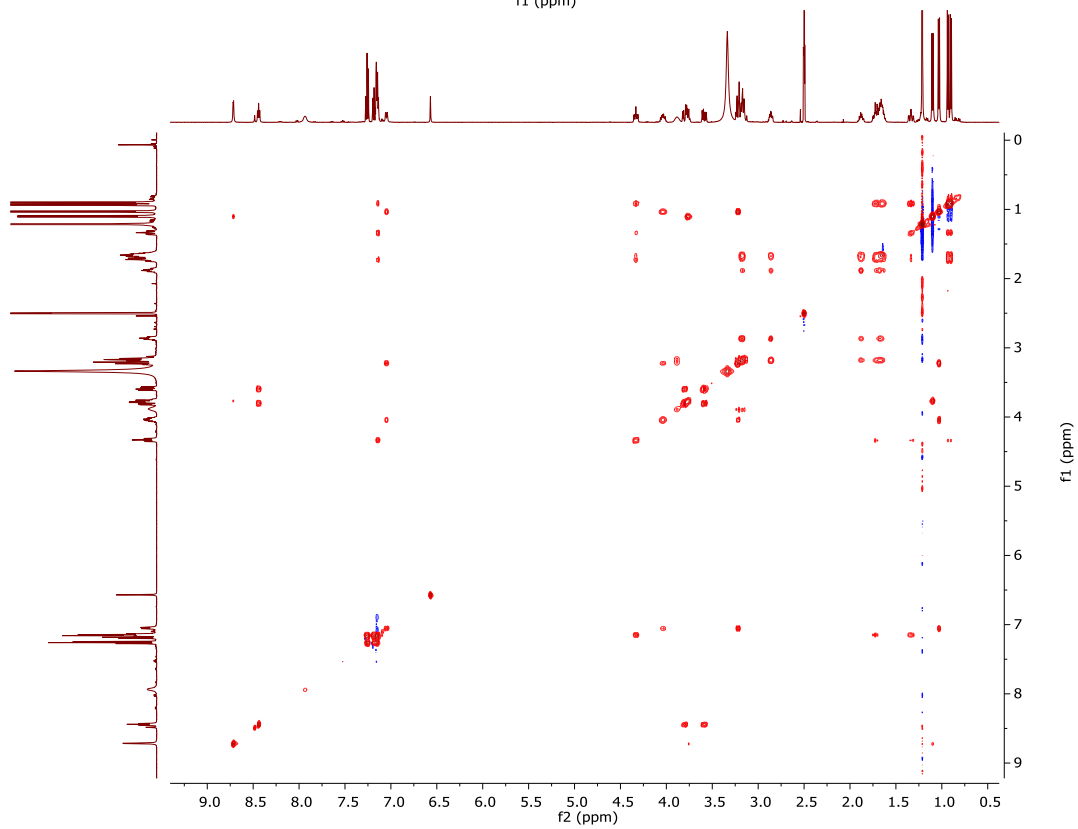

TOCSY (DMSO-*d*<sub>6</sub>, 25 °C)

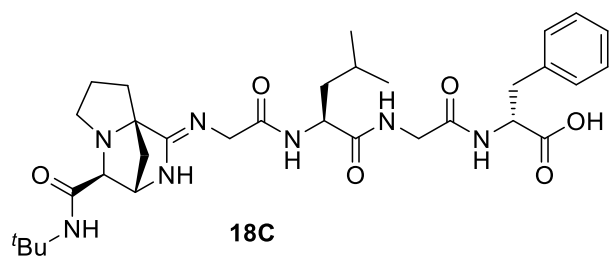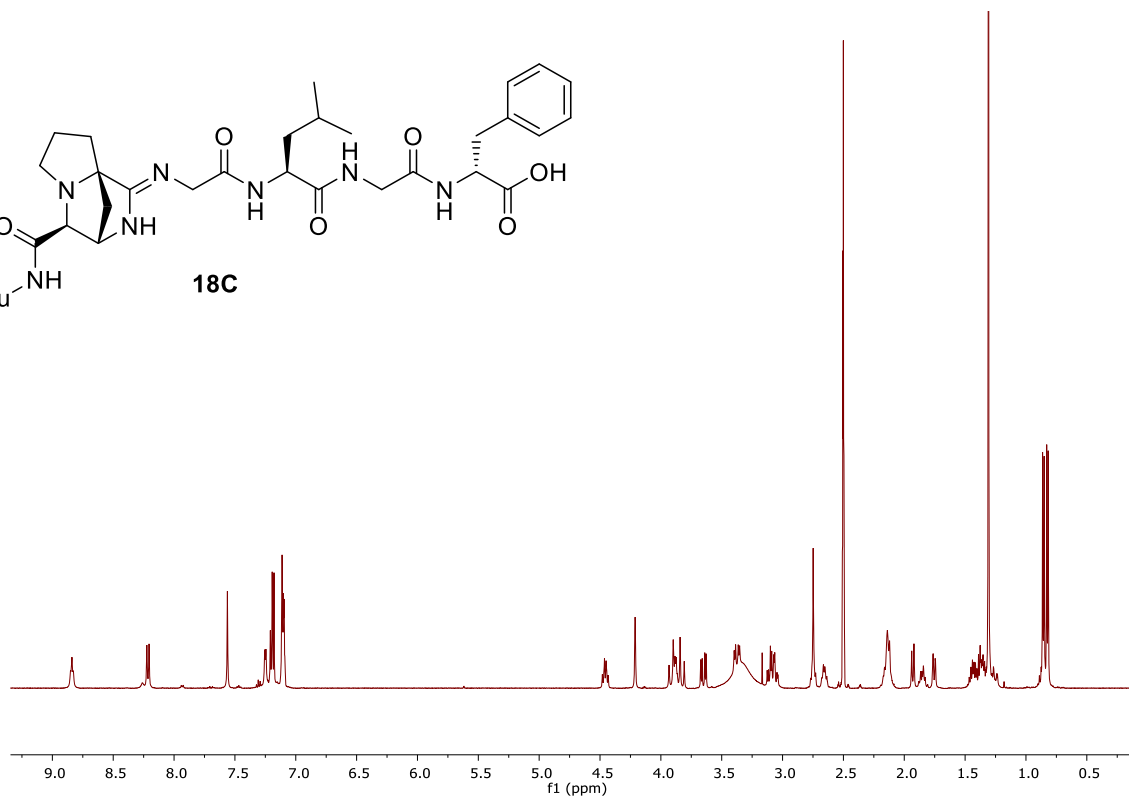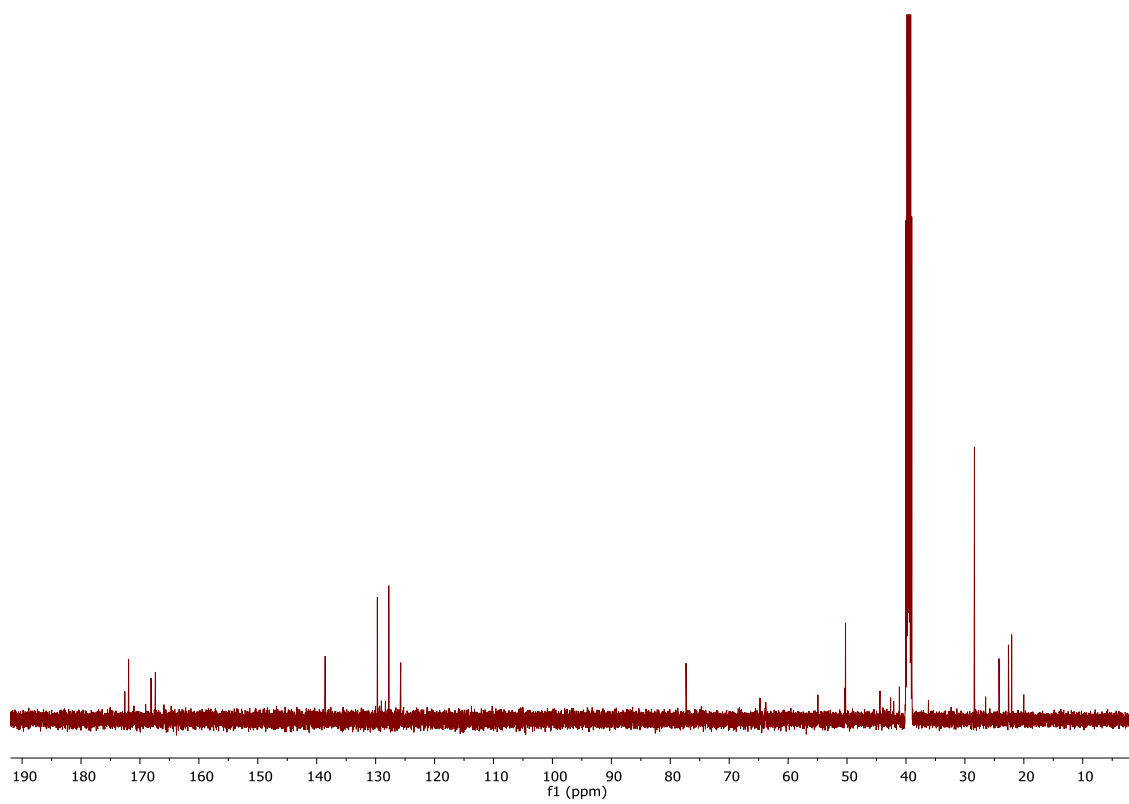



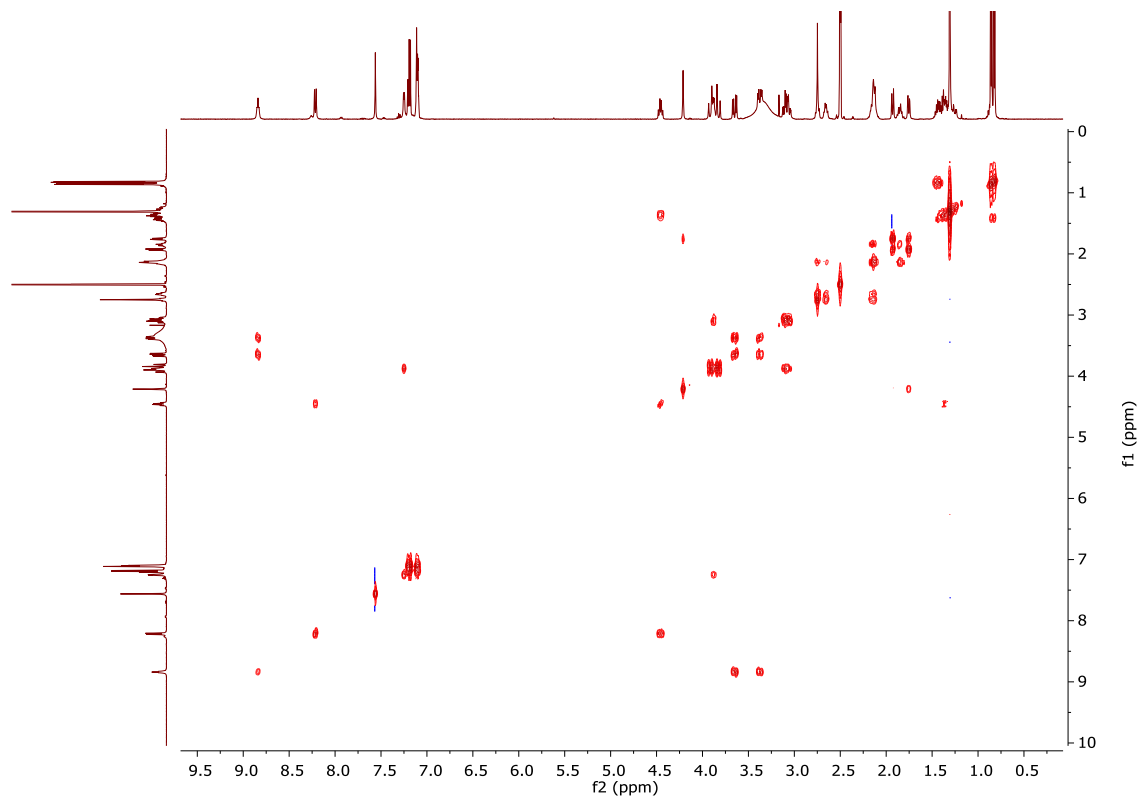

COSY (DMSO- $d_6$ , 25 °C)

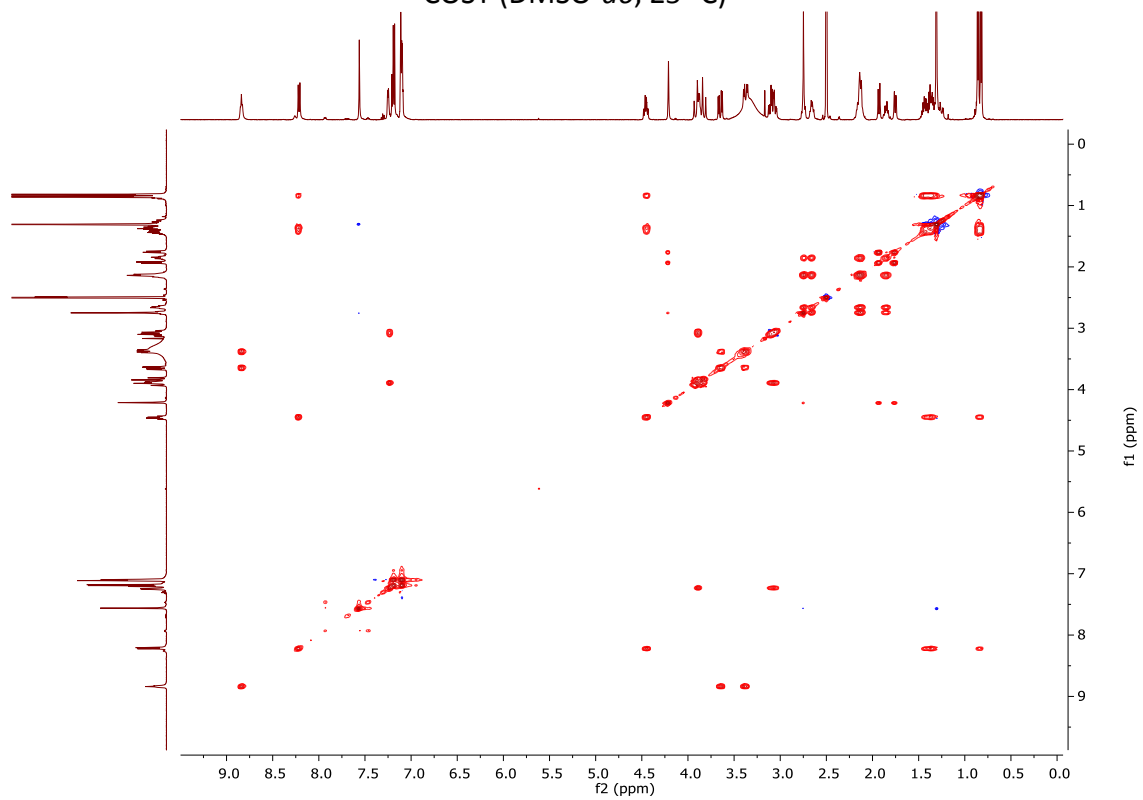

TOCSY (DMSO- $d_6$ , 25 °C)

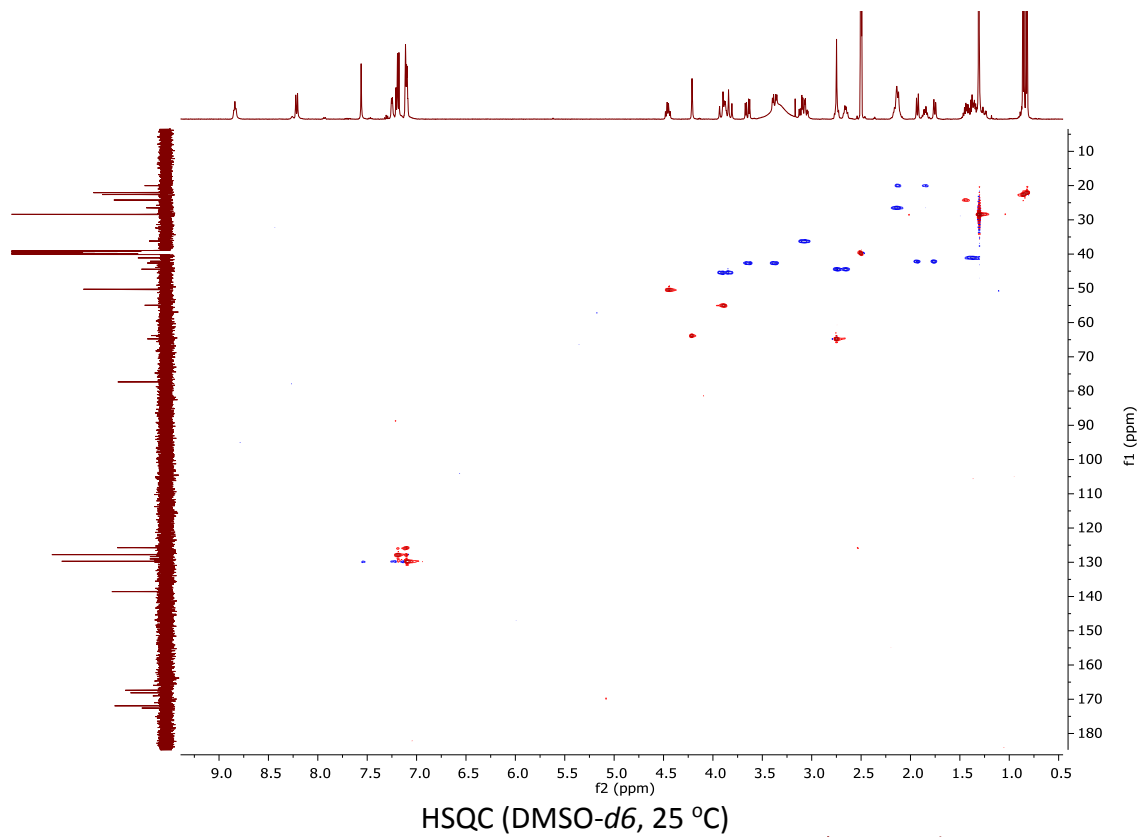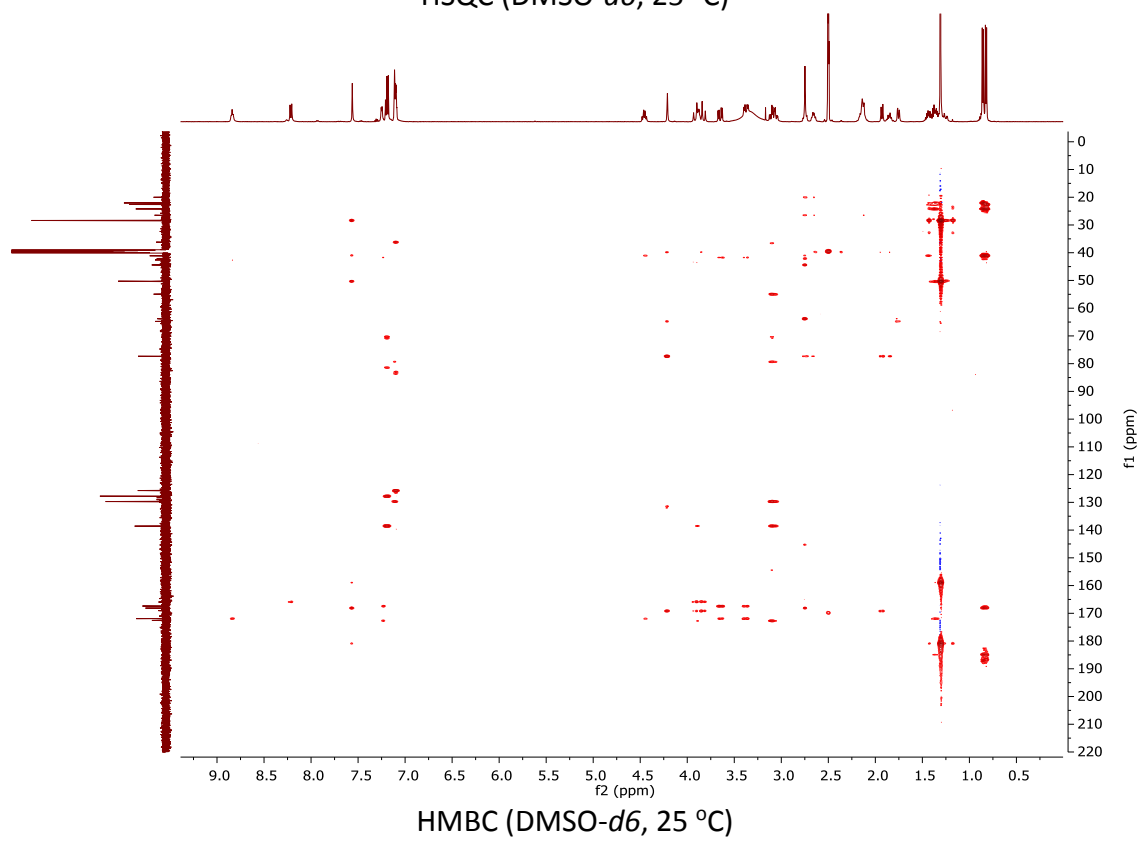

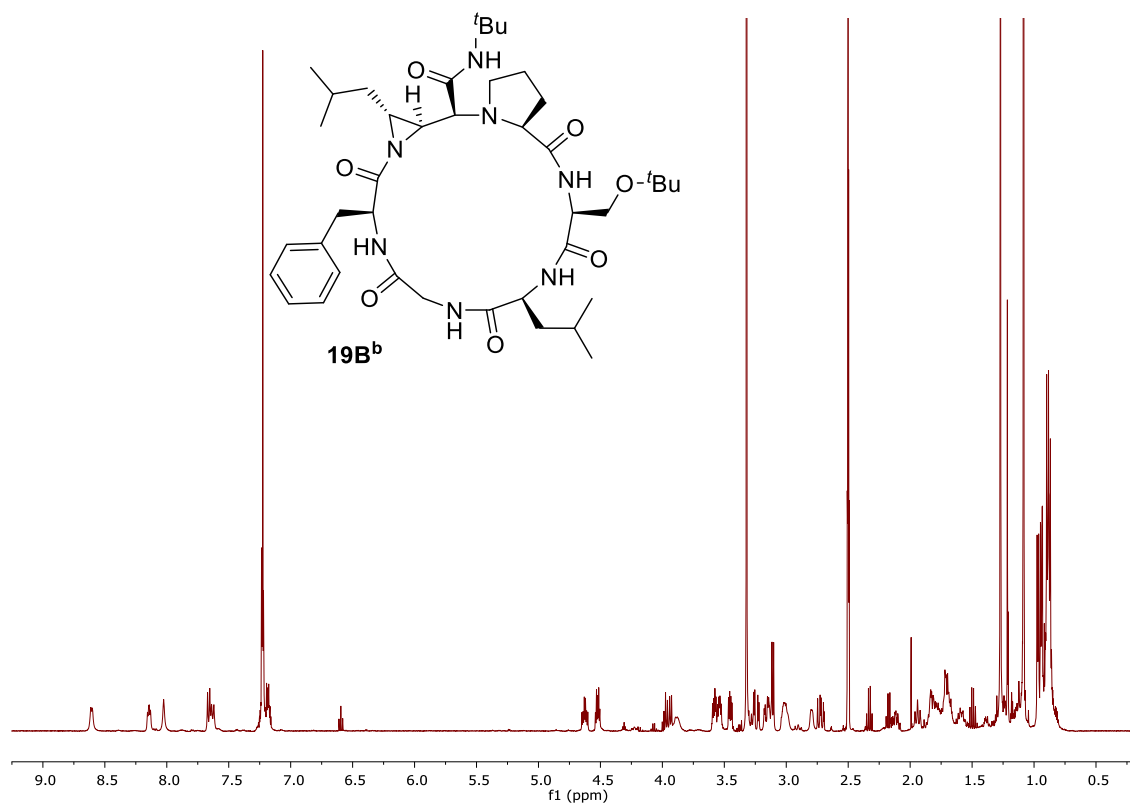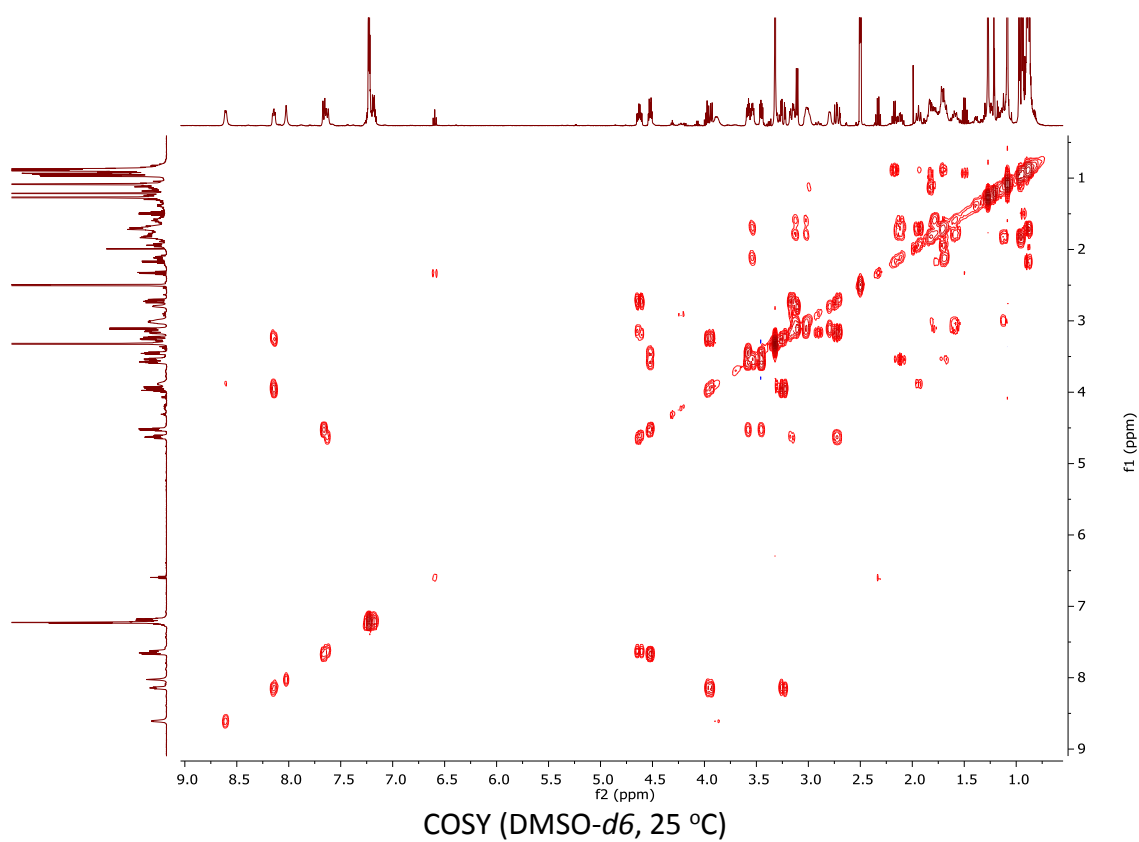

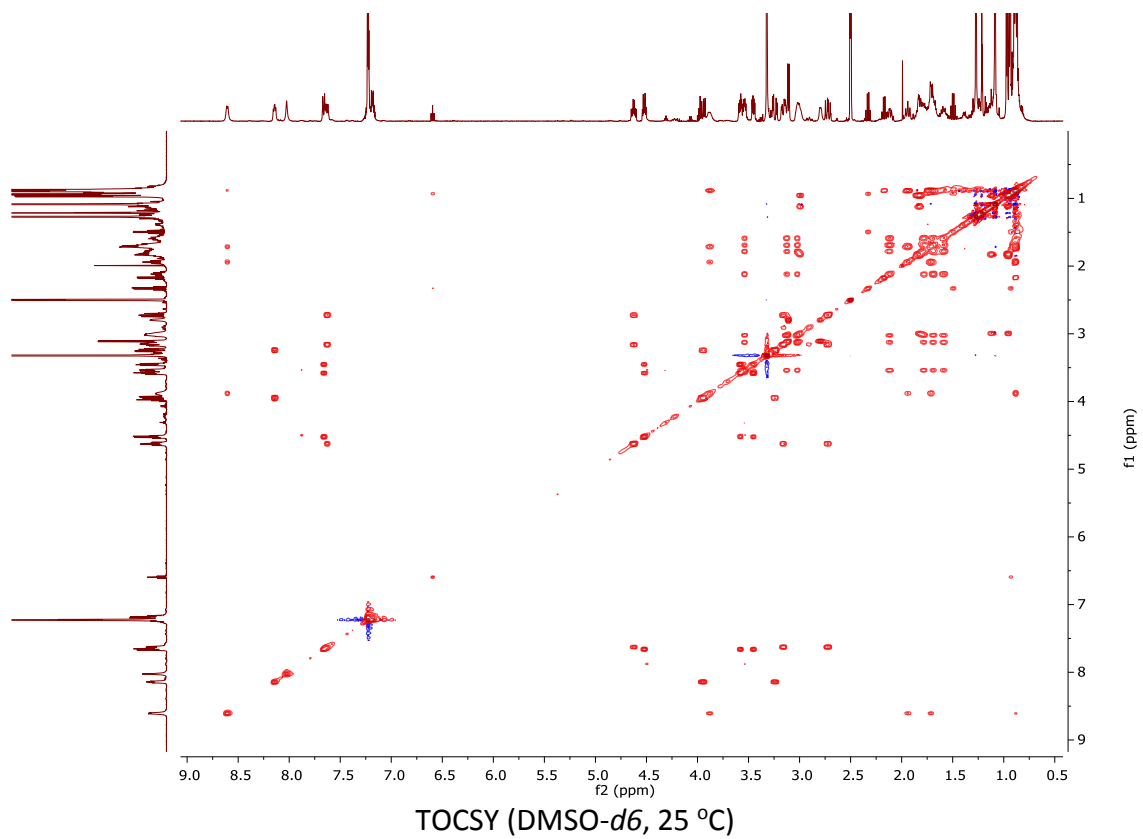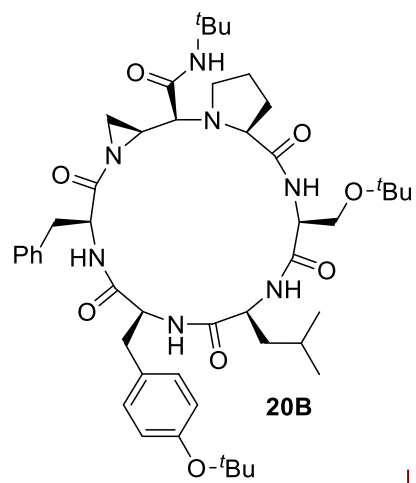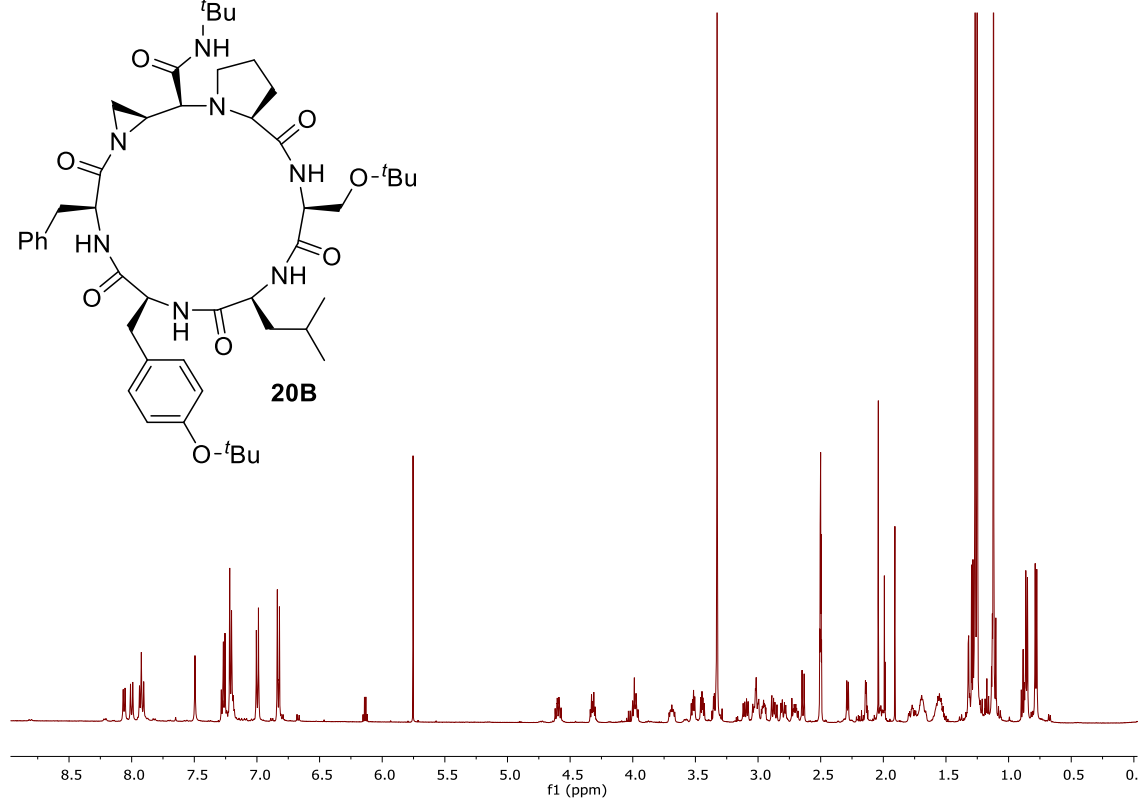

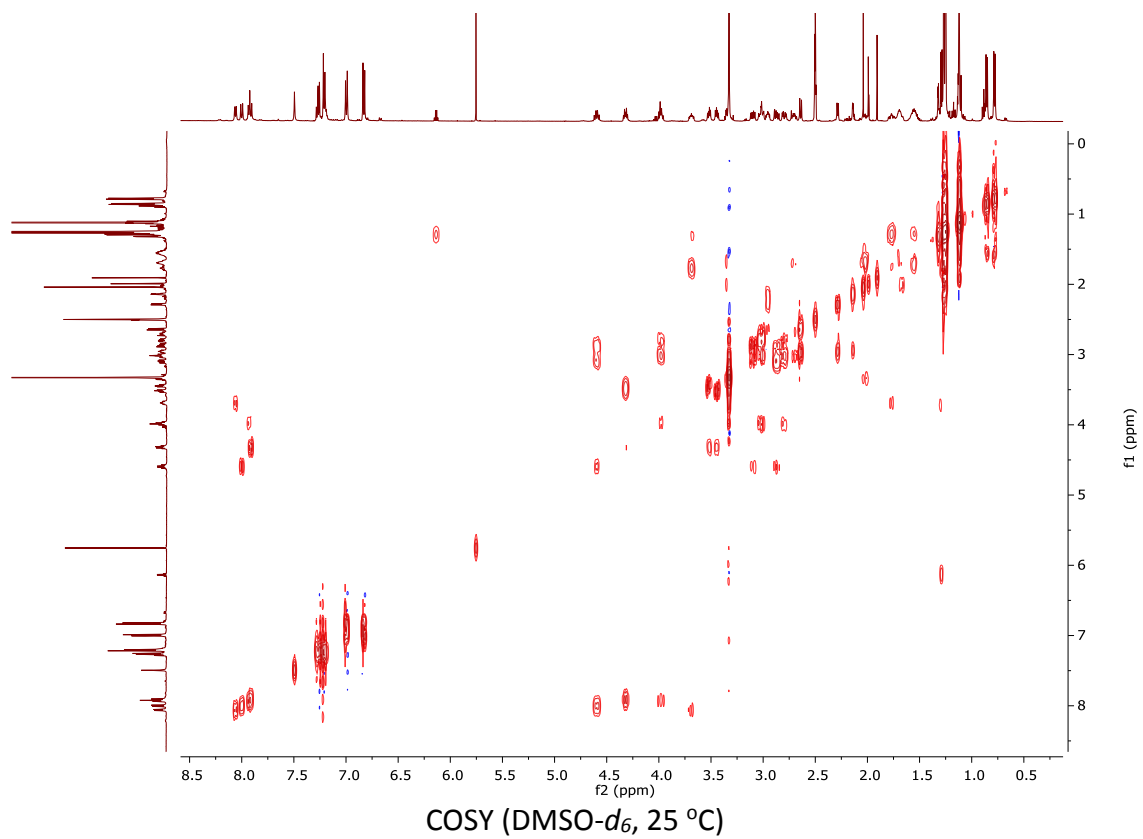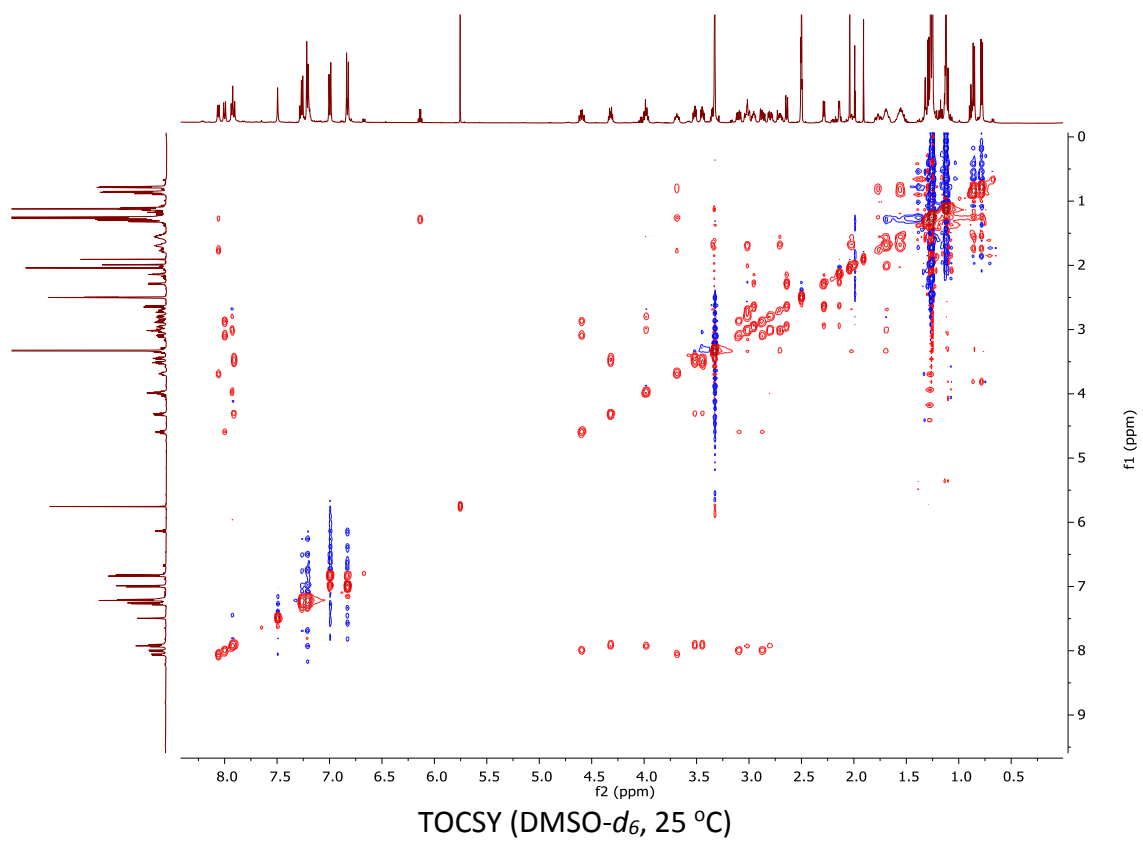

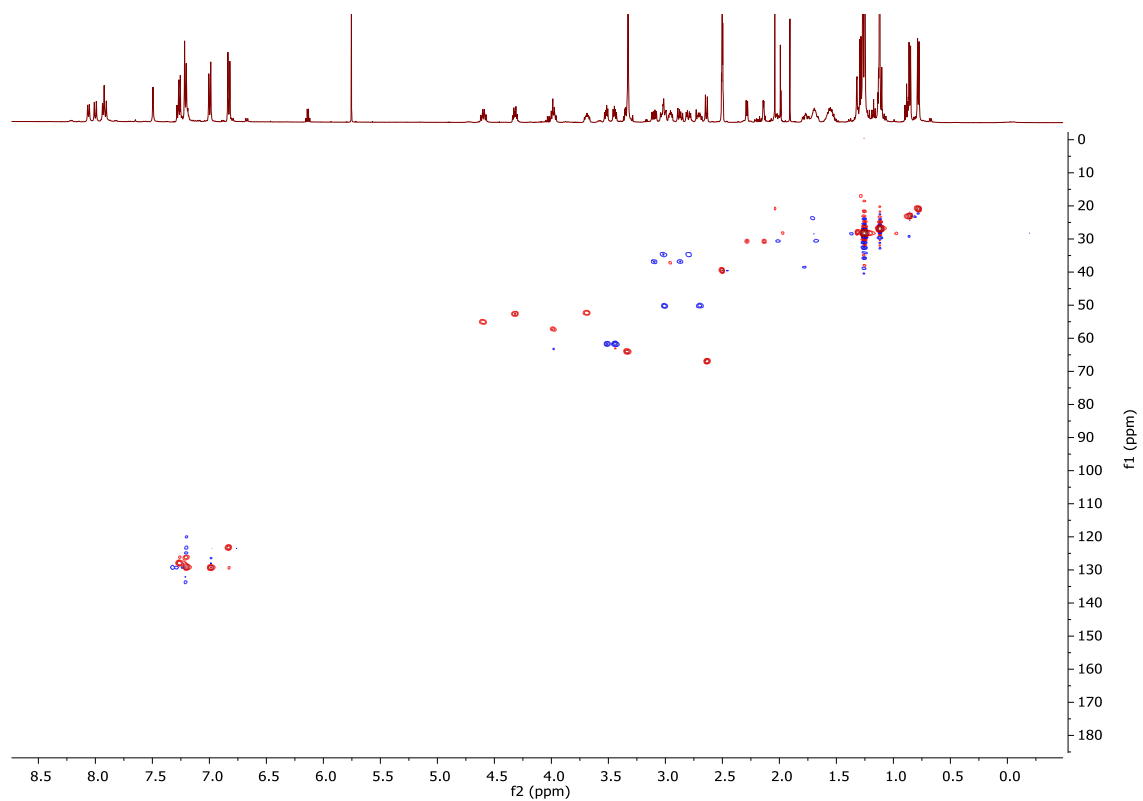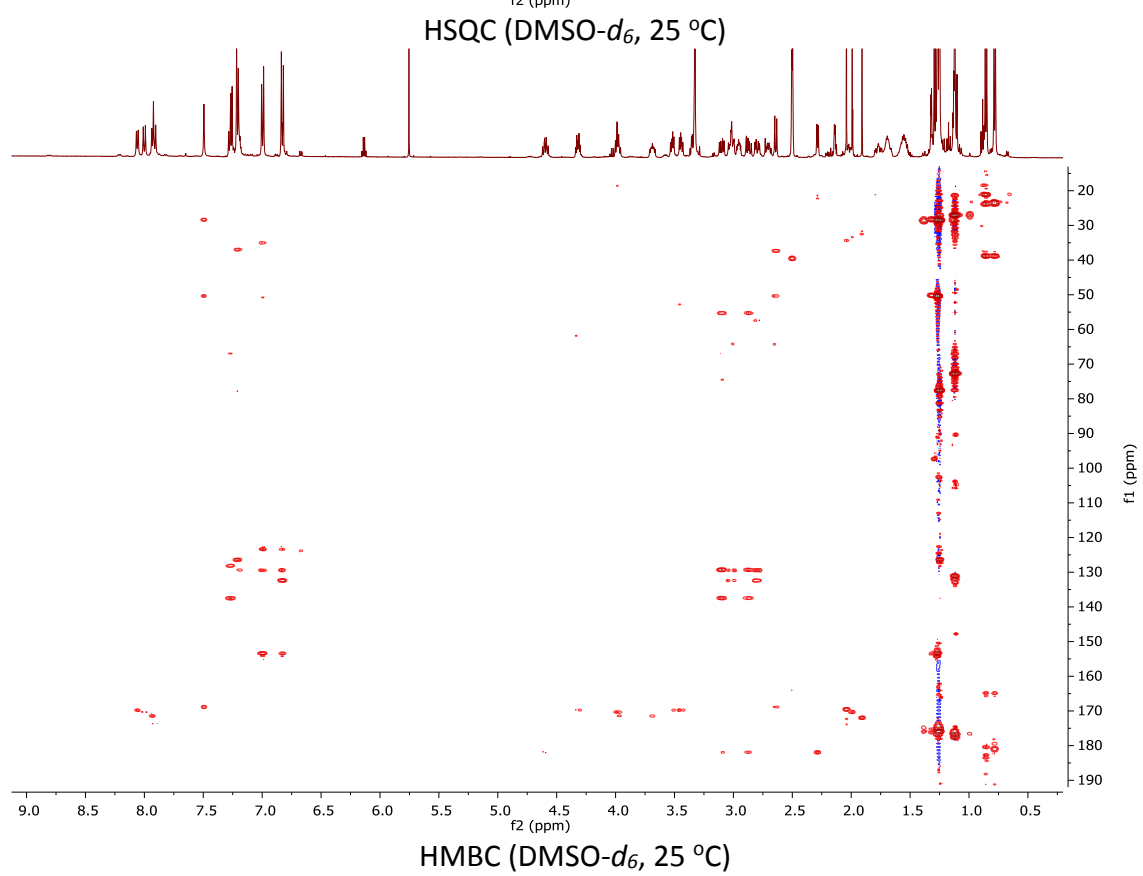

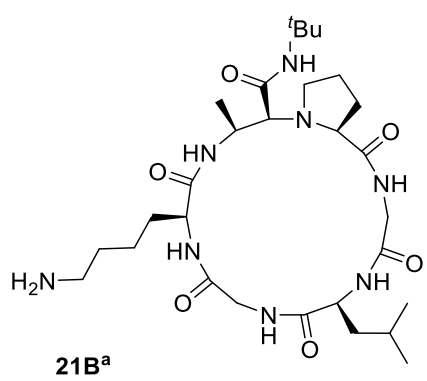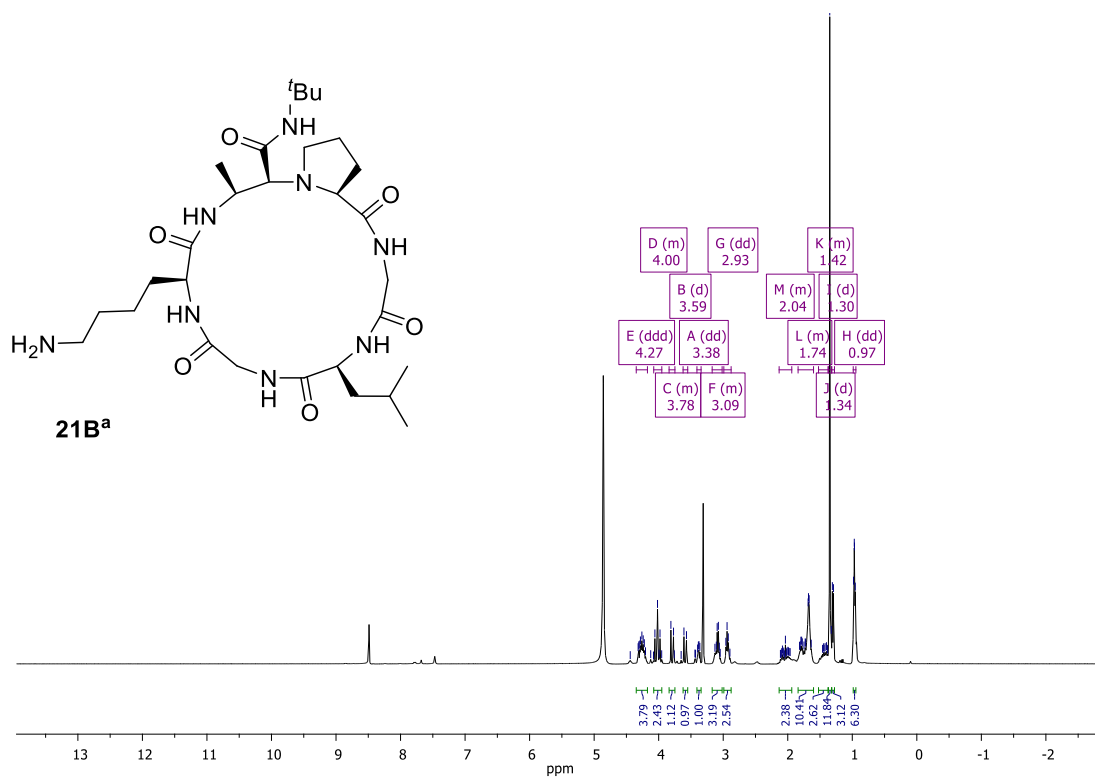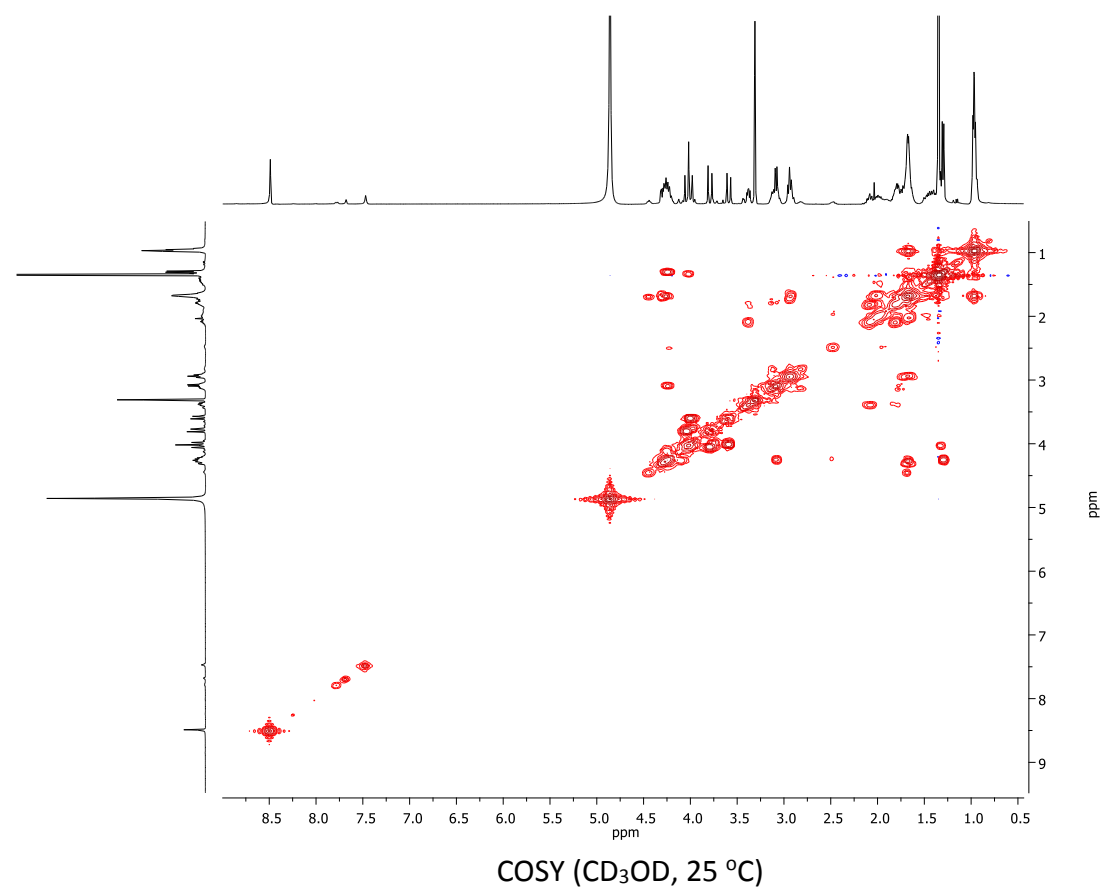

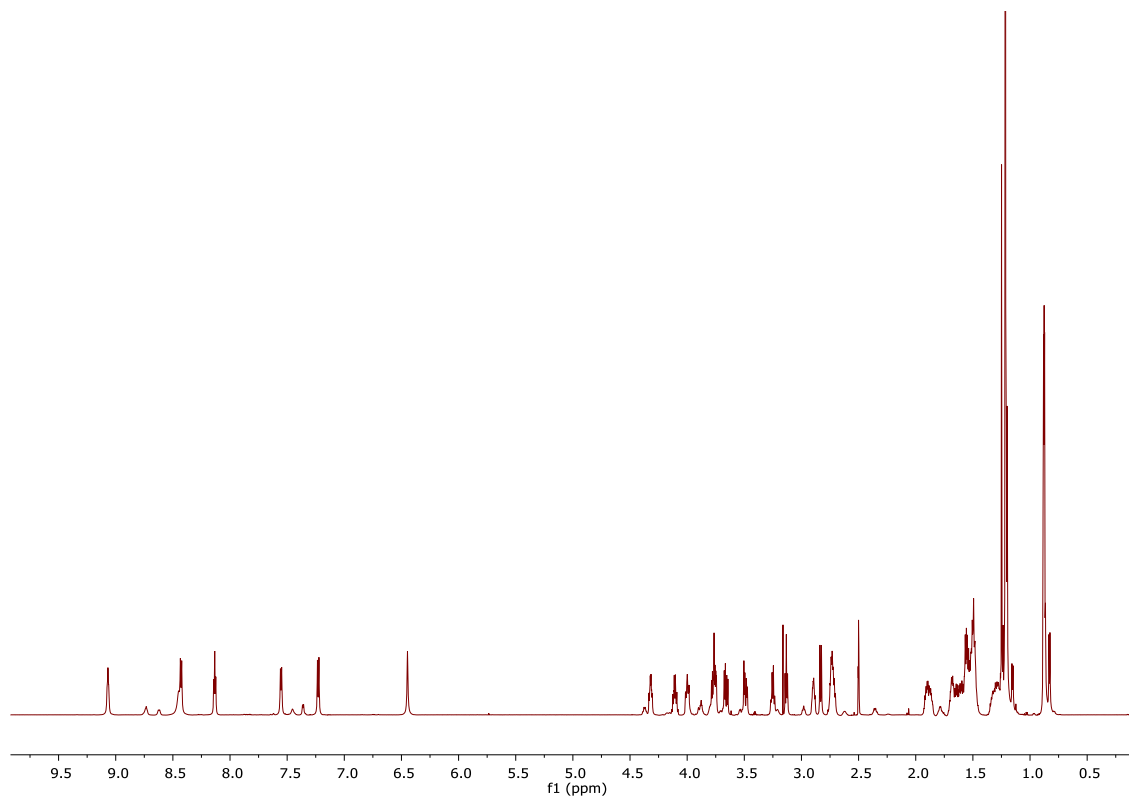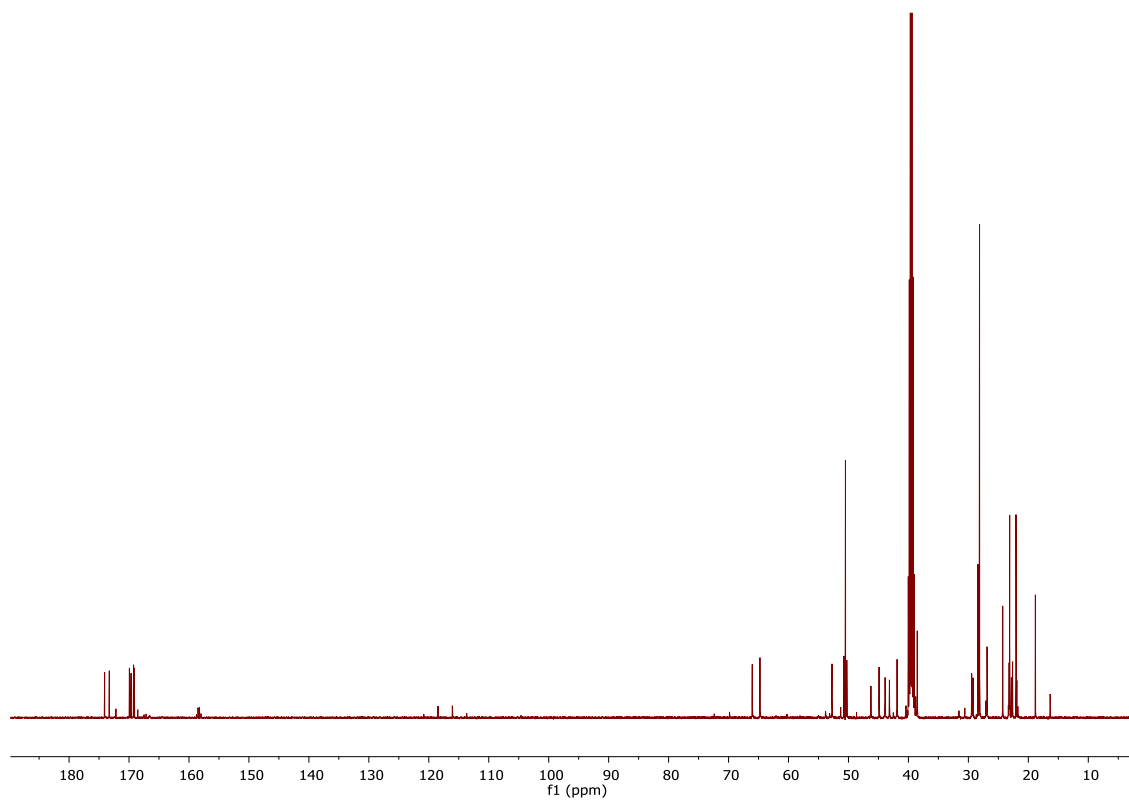



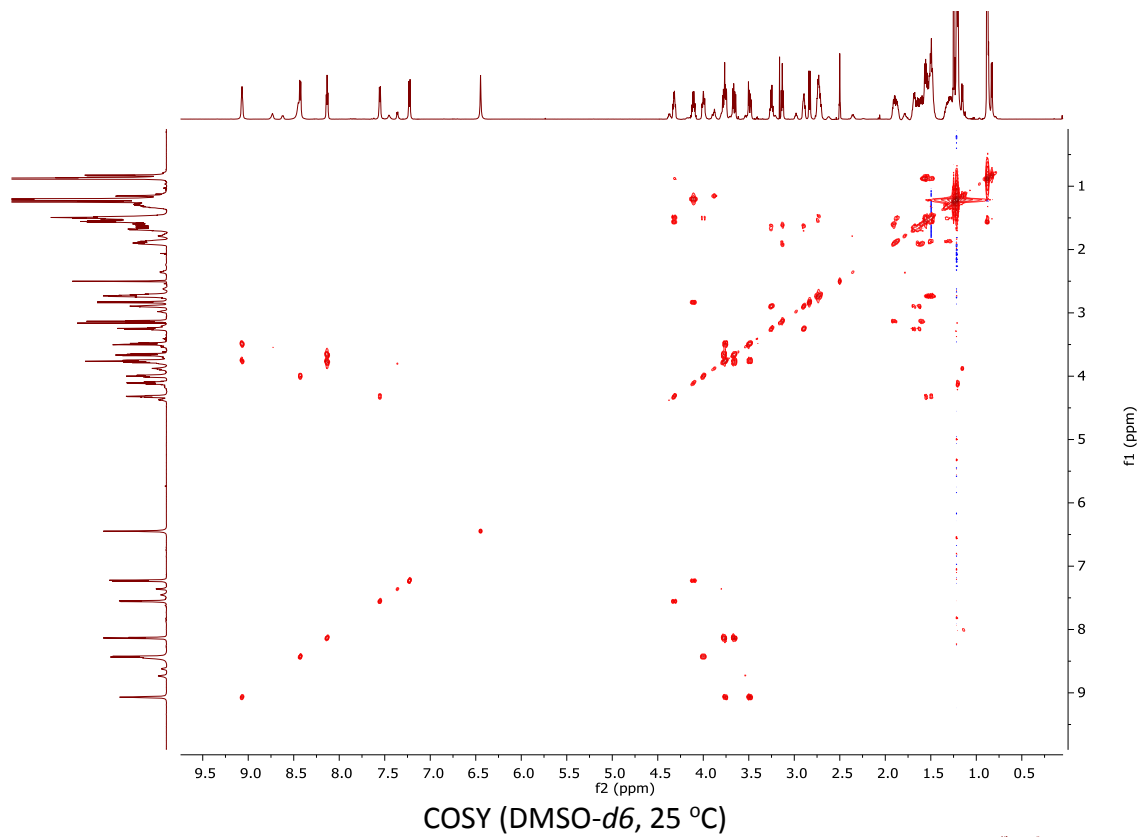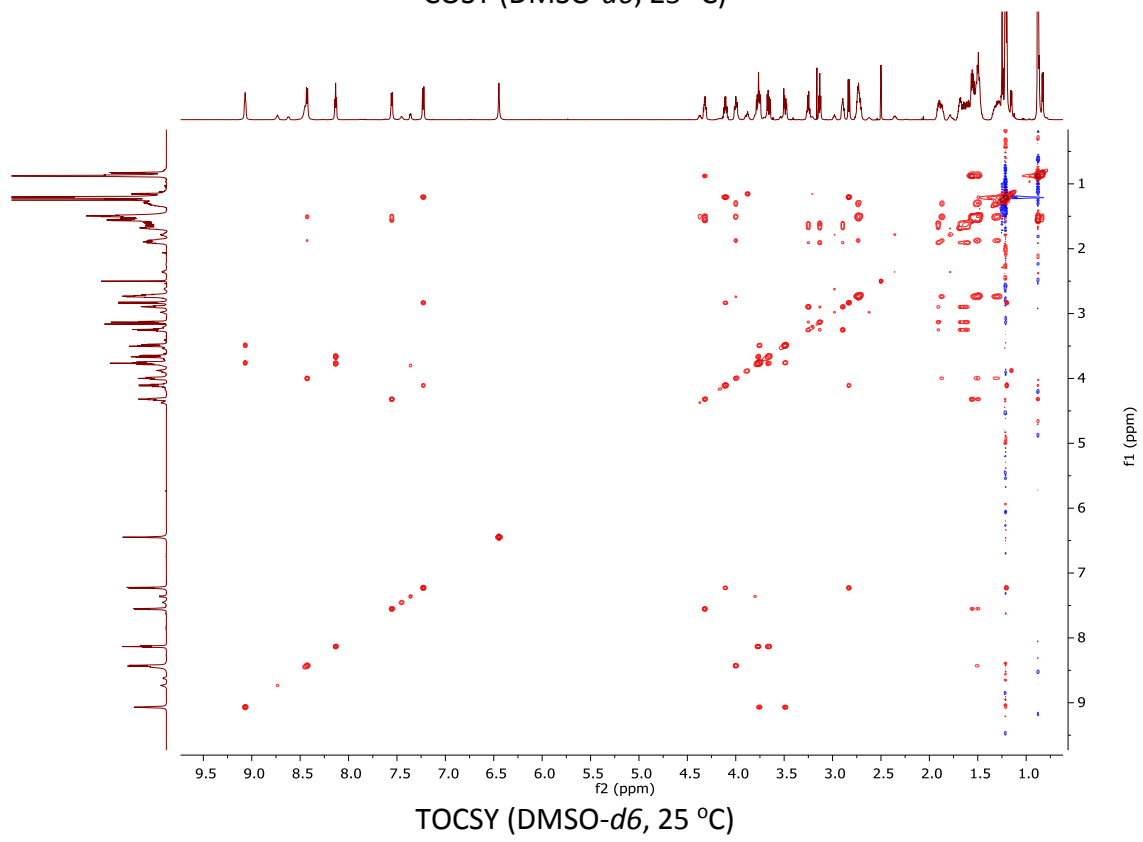

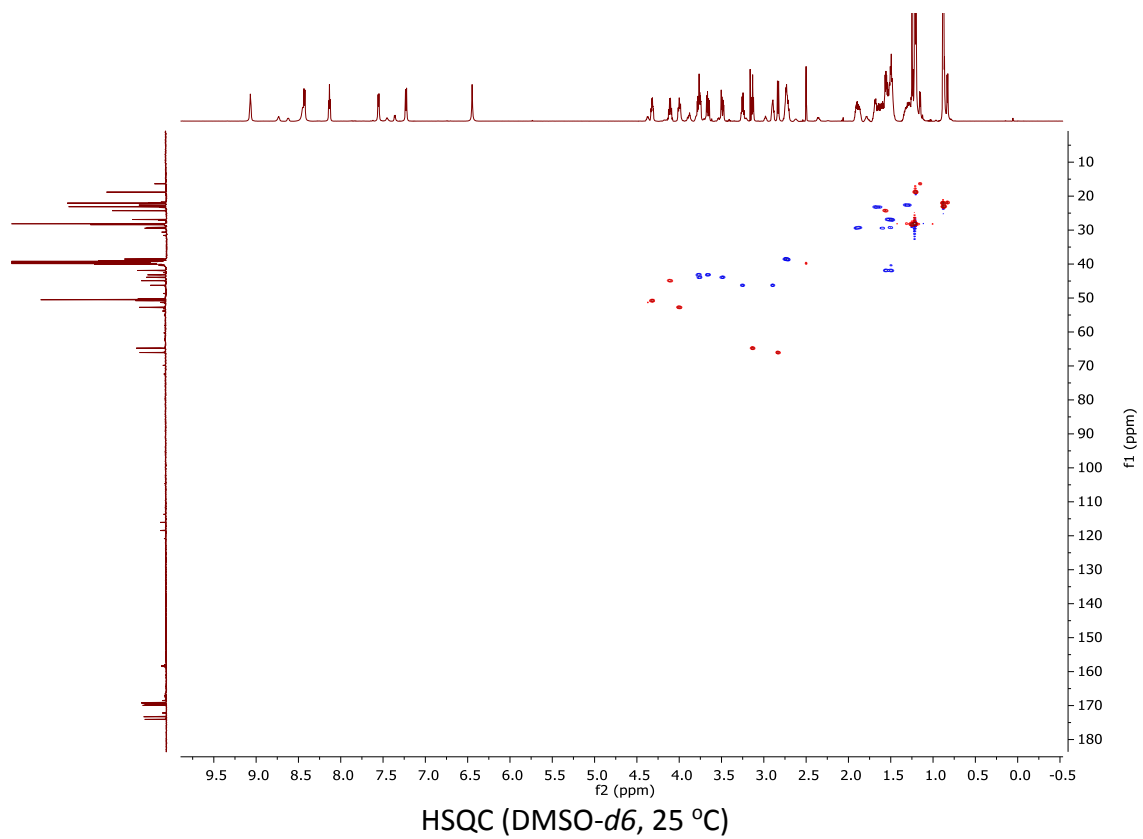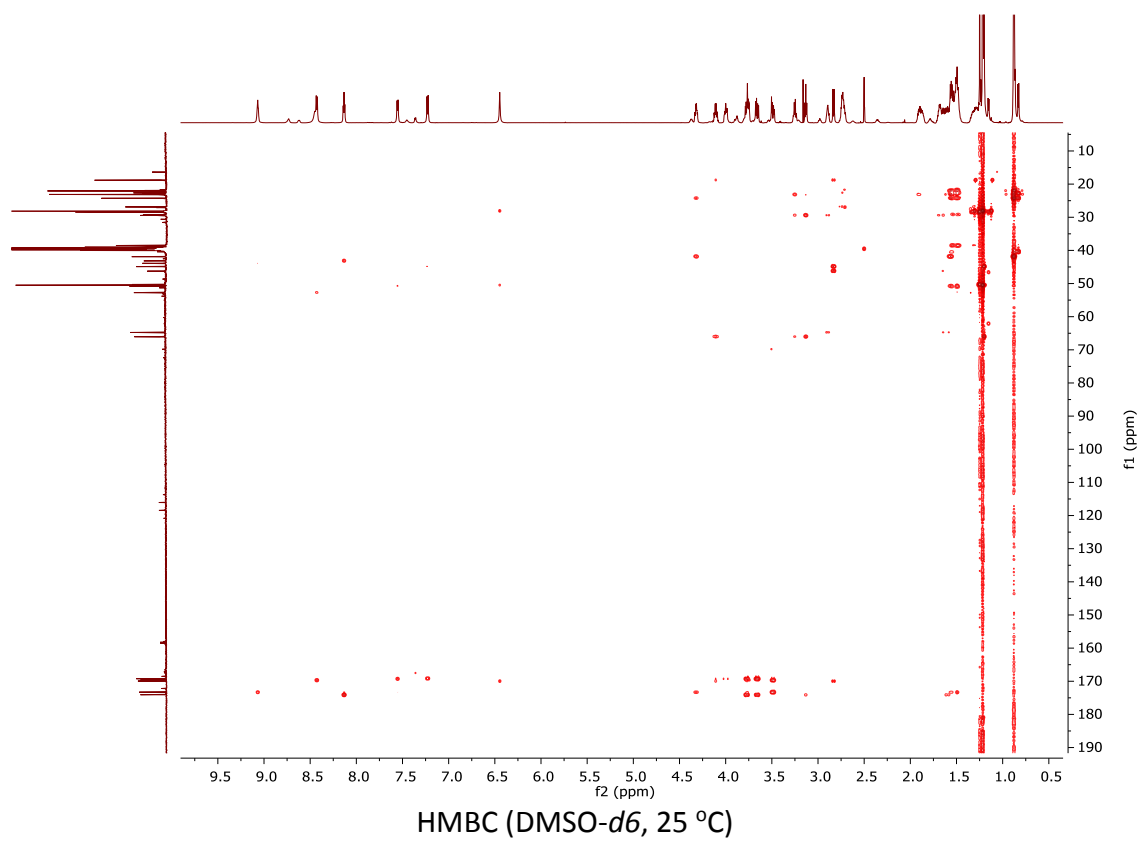



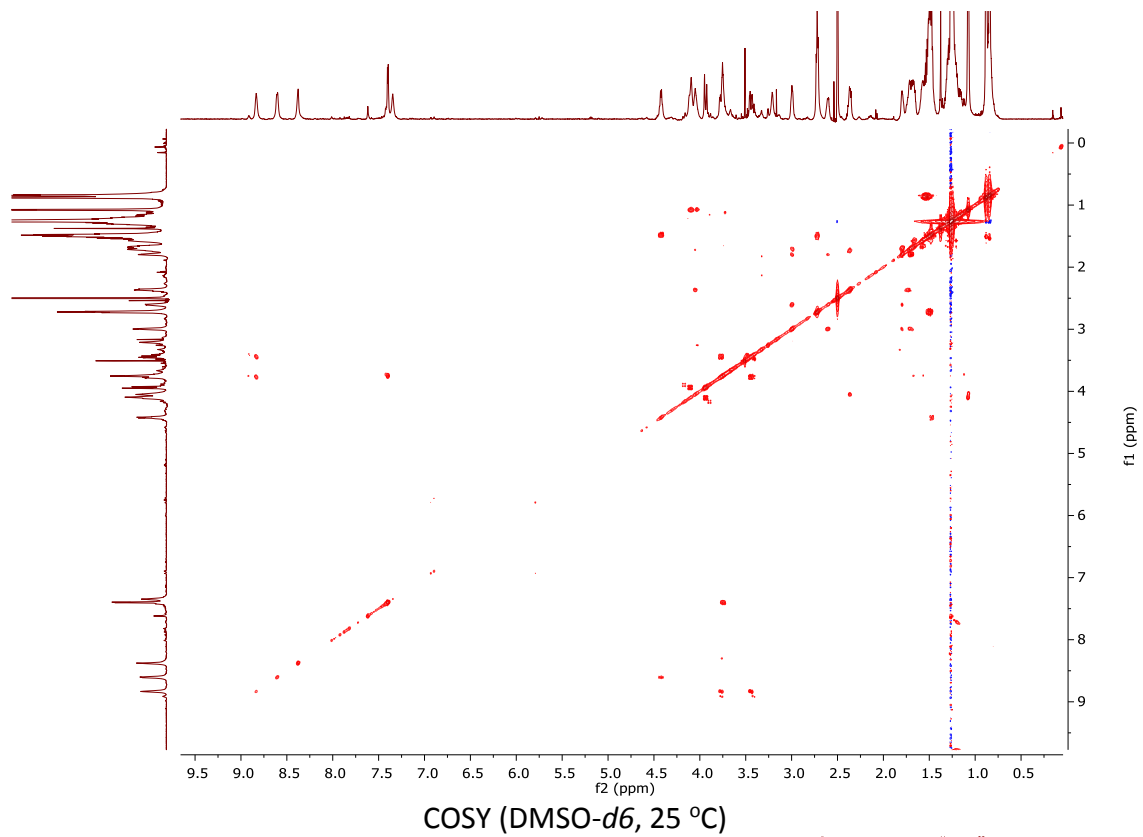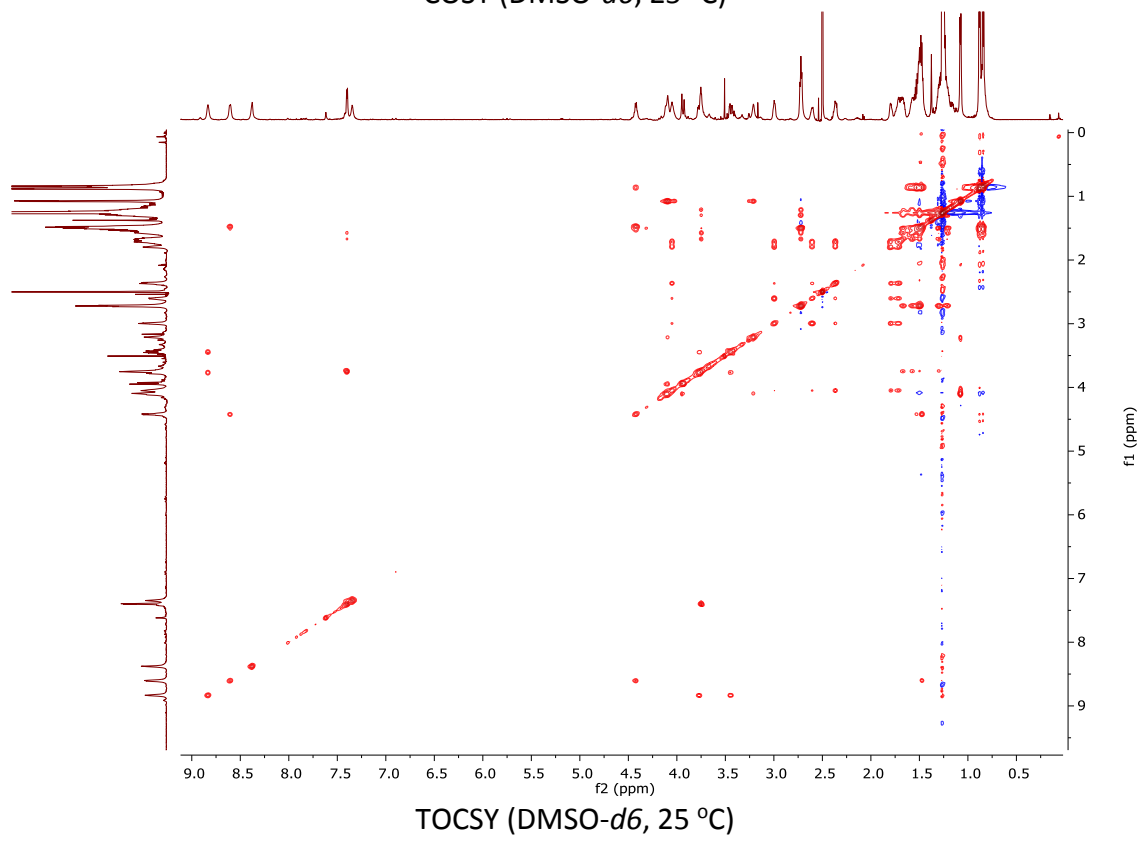

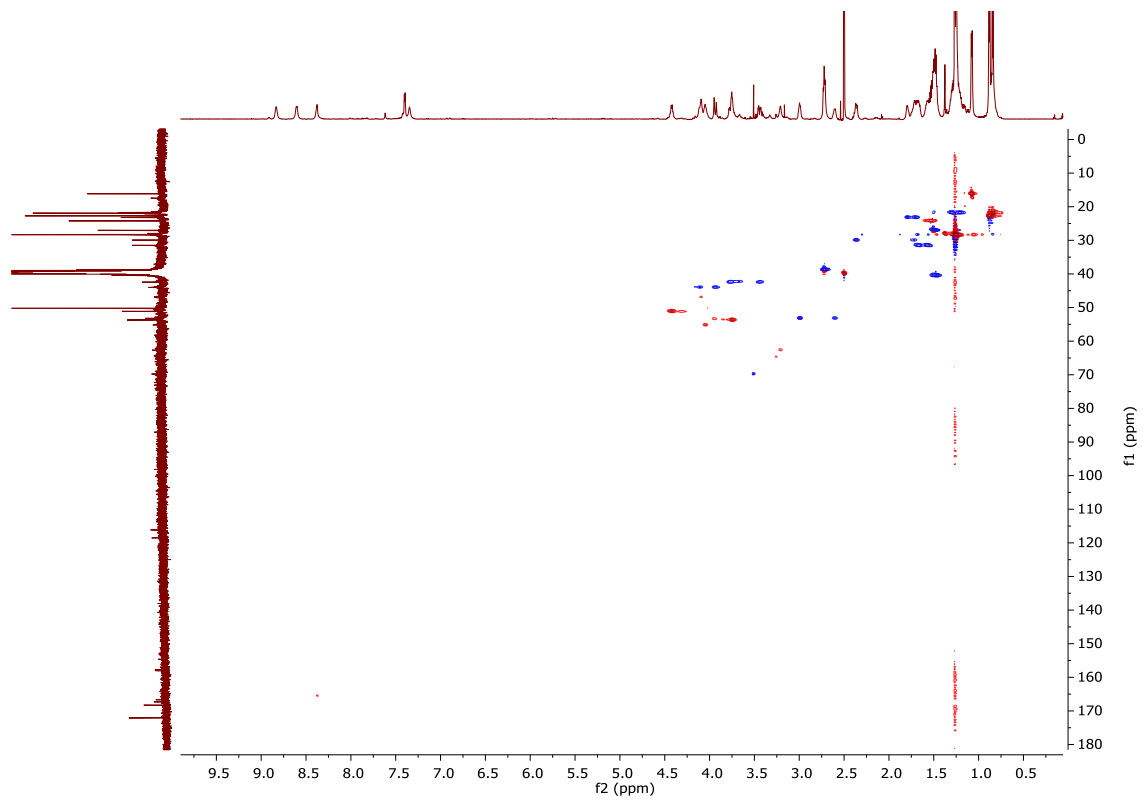

HSQC (DMSO-*d*<sub>6</sub>, 25 °C)

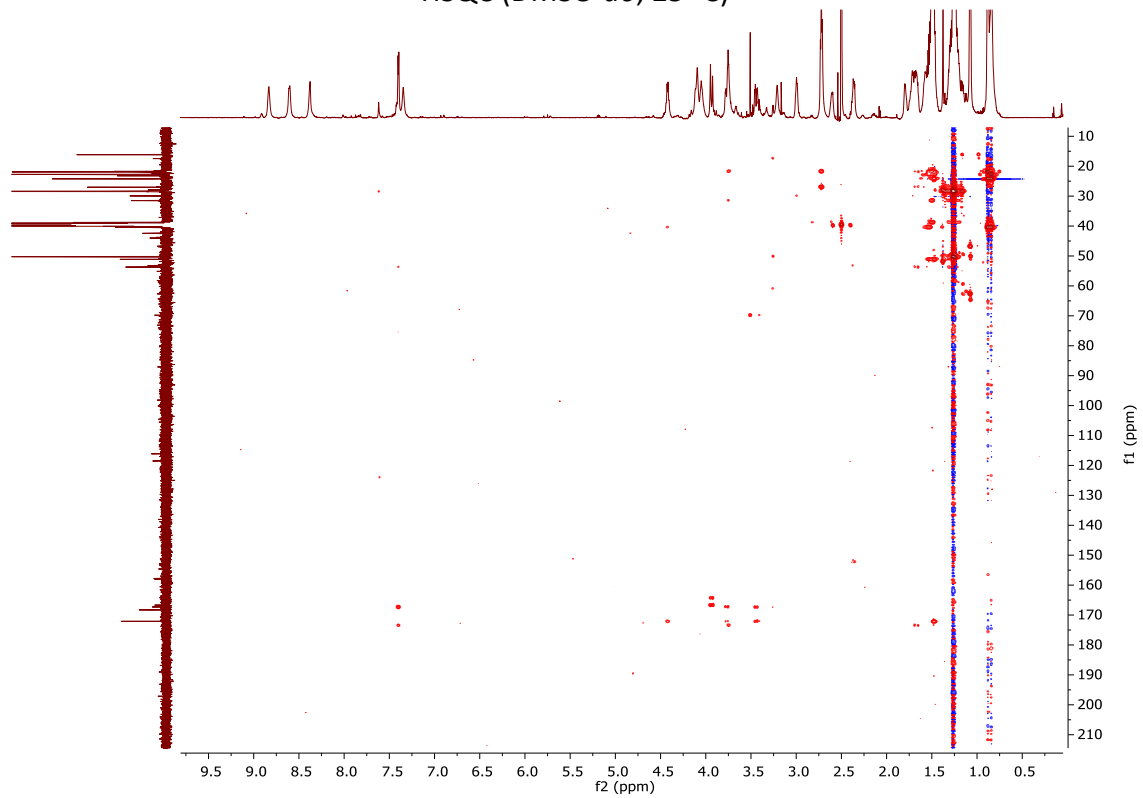

HMBC (DMSO-*d*<sub>6</sub>, 25 °C)



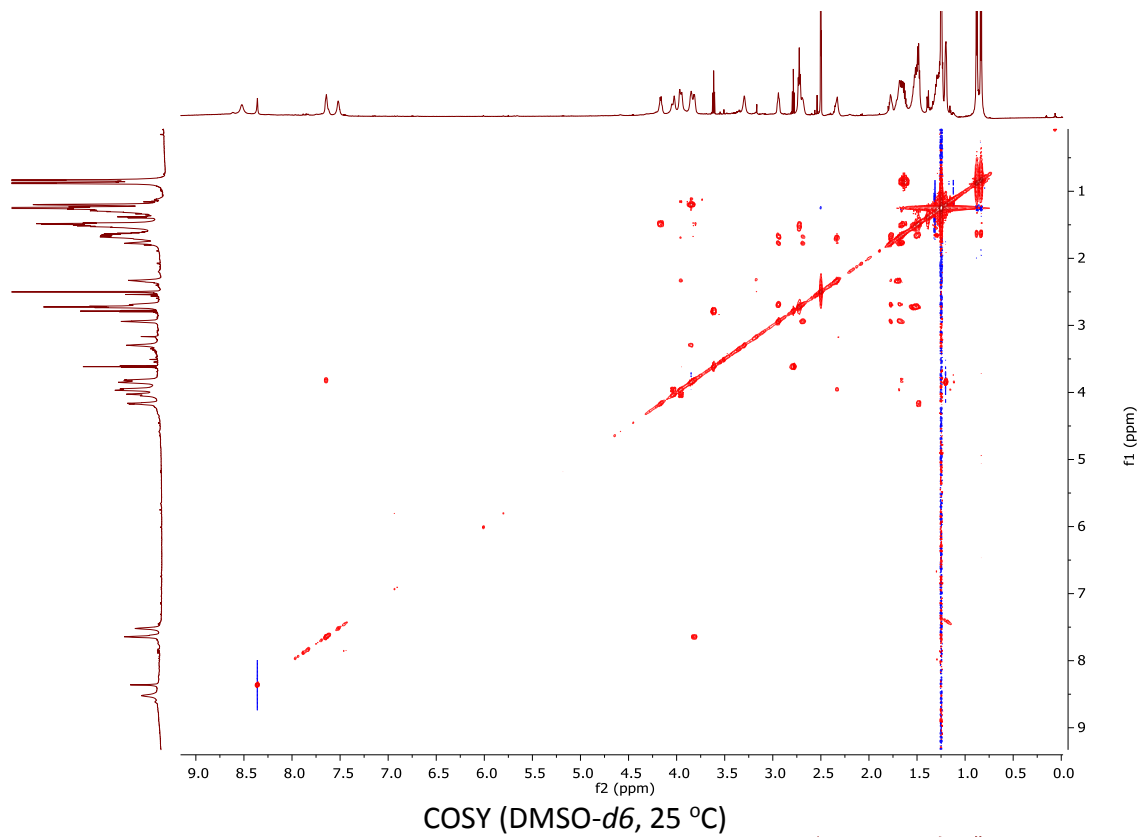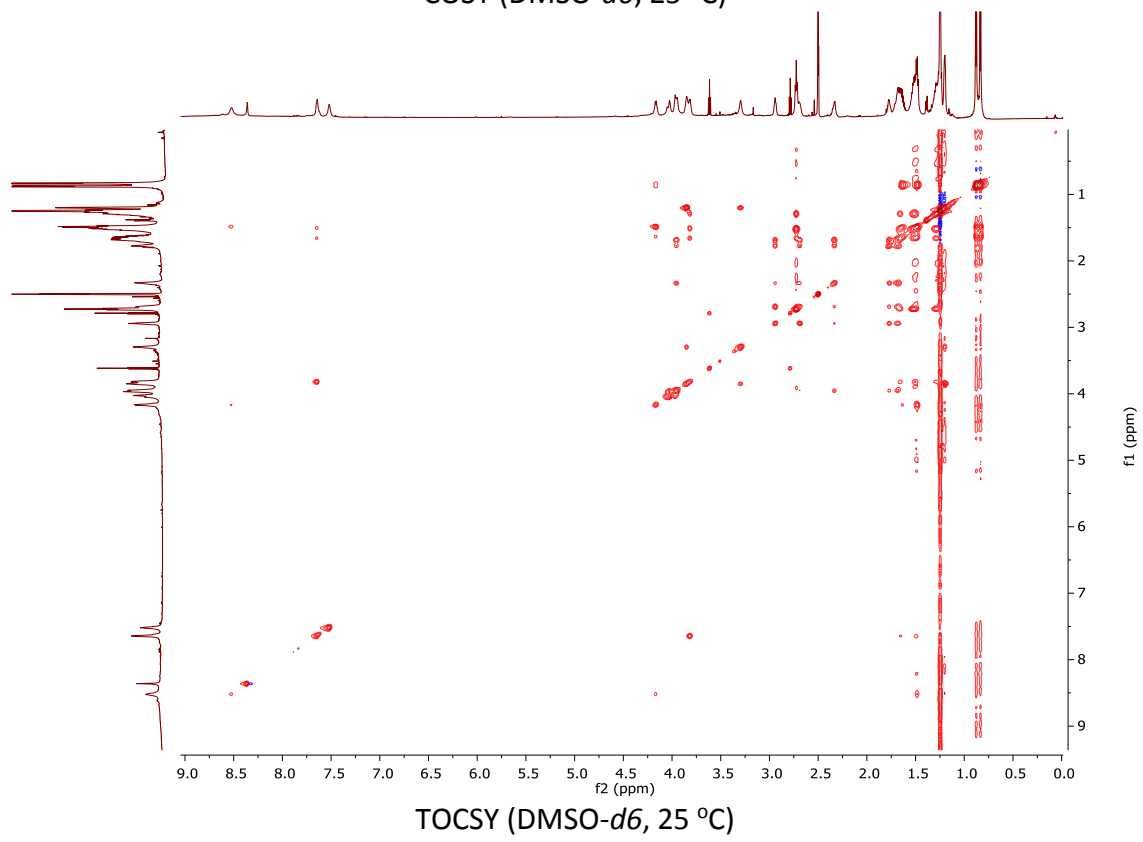

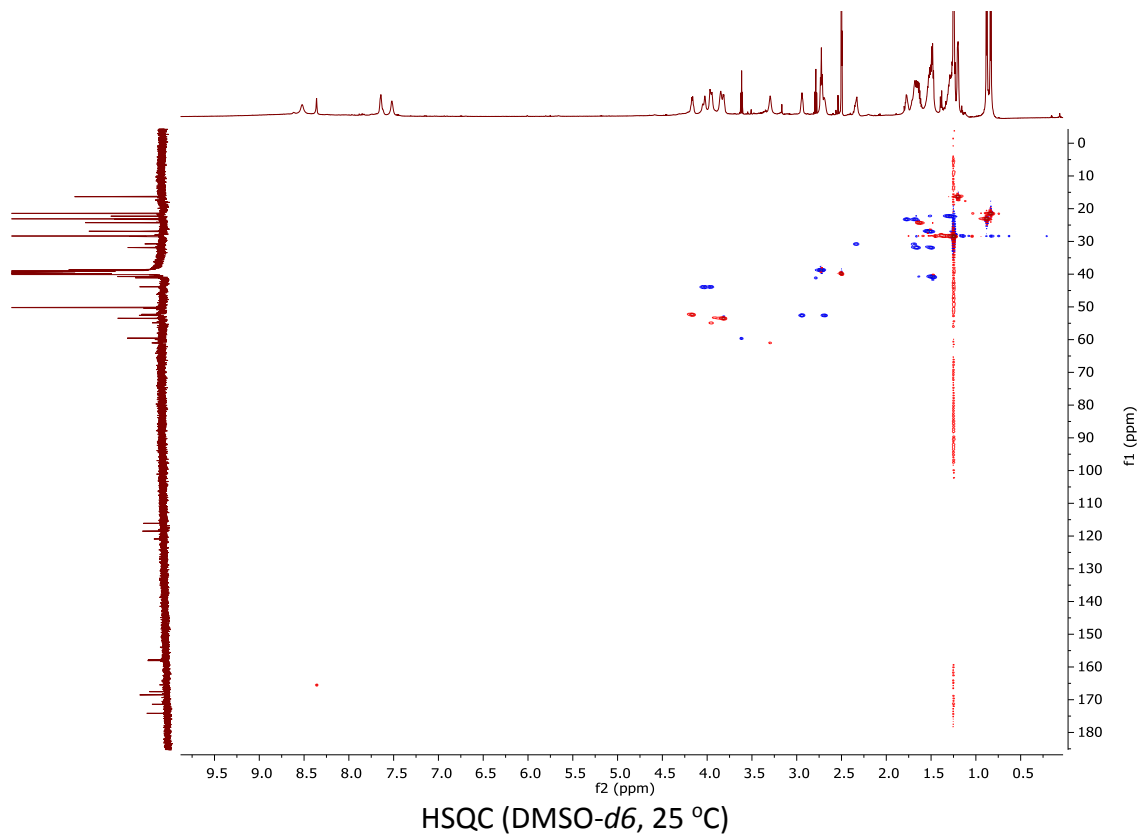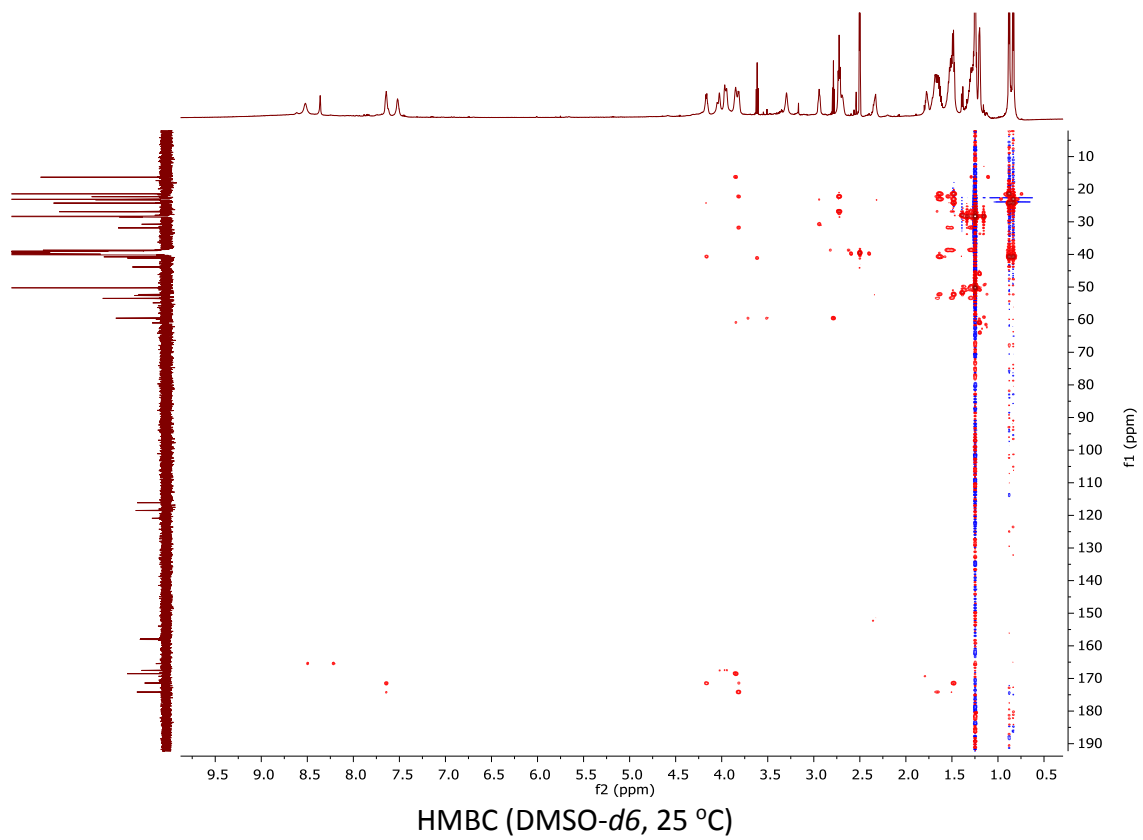



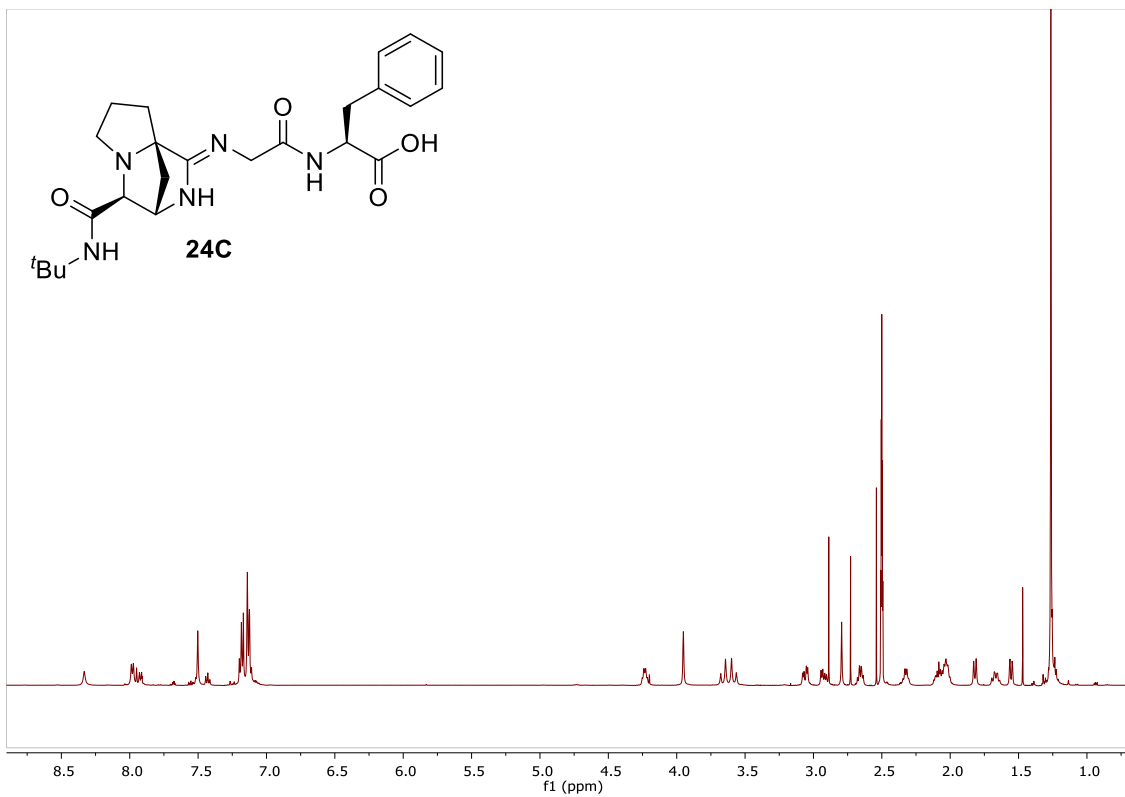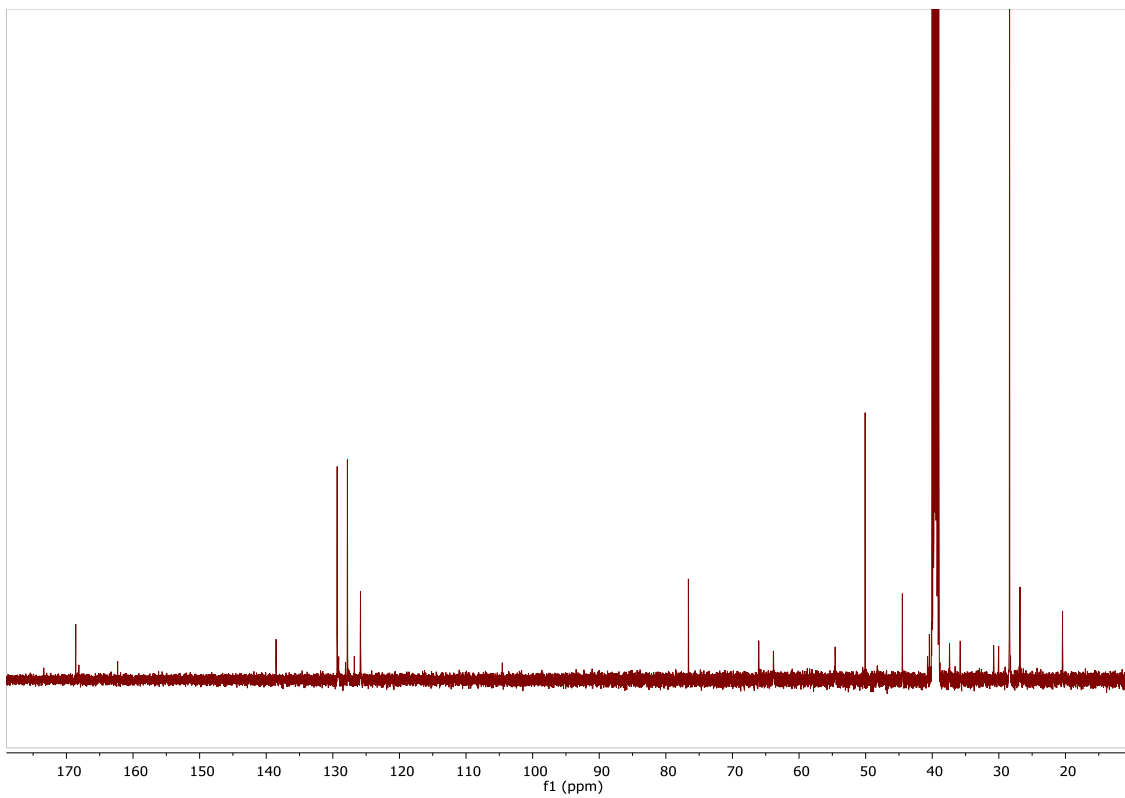

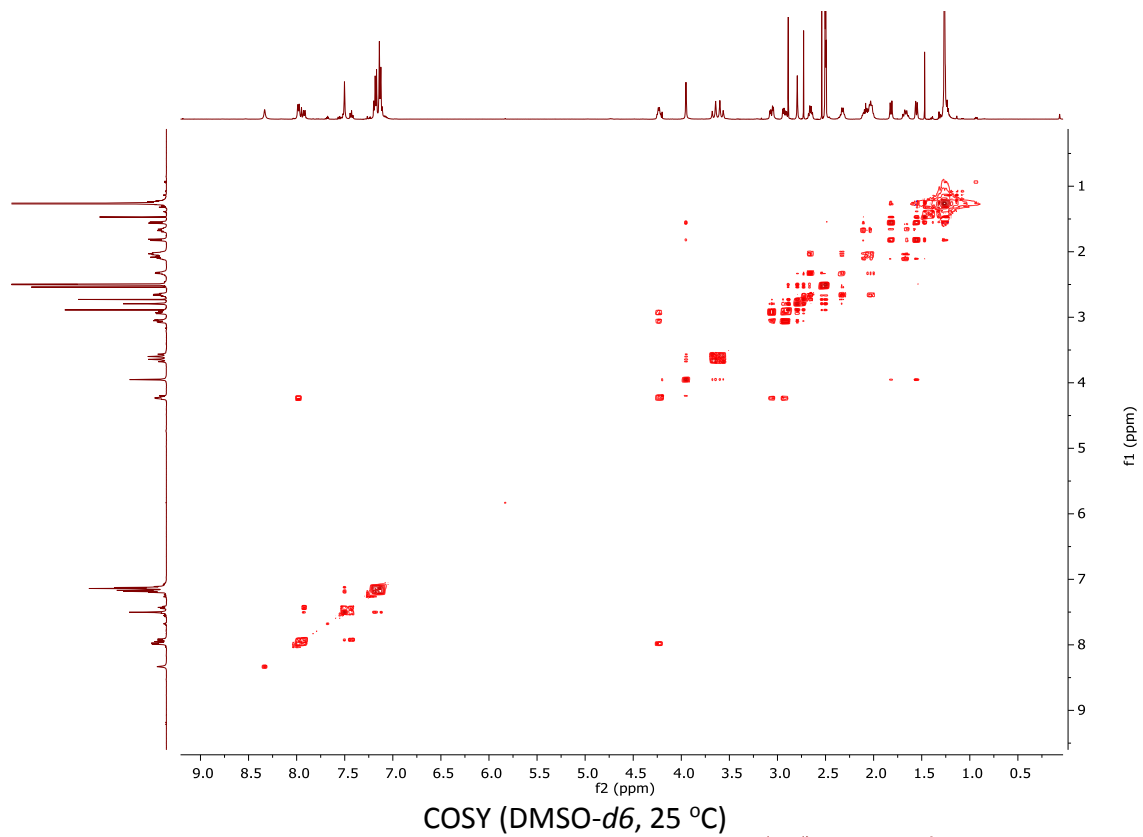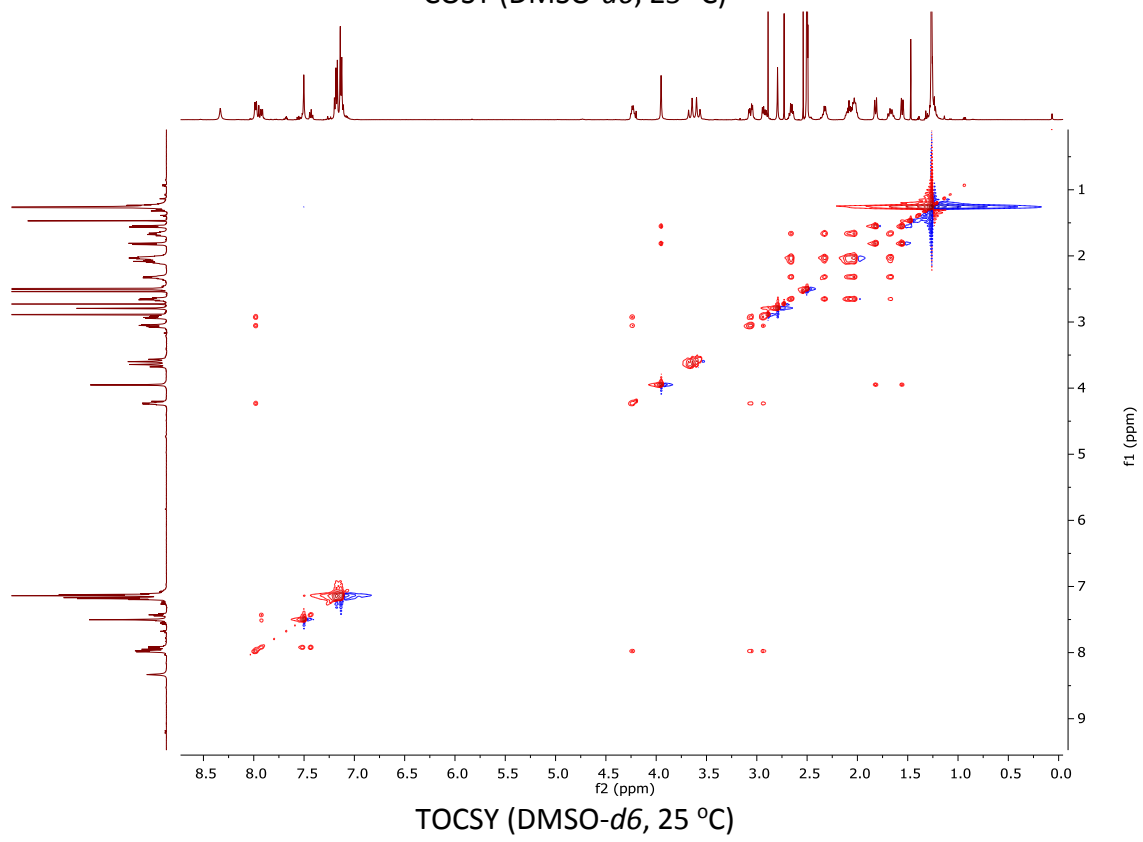

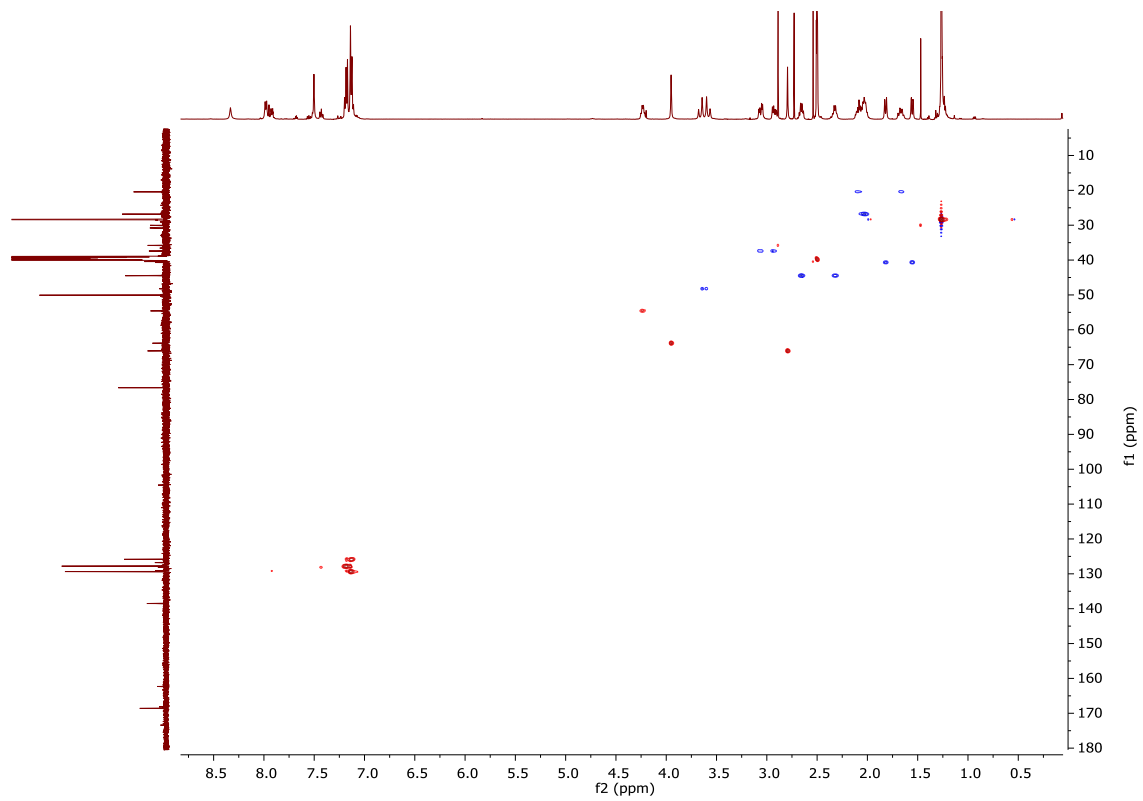

HSQC (DMSO-*d*<sub>6</sub>, 25 °C)

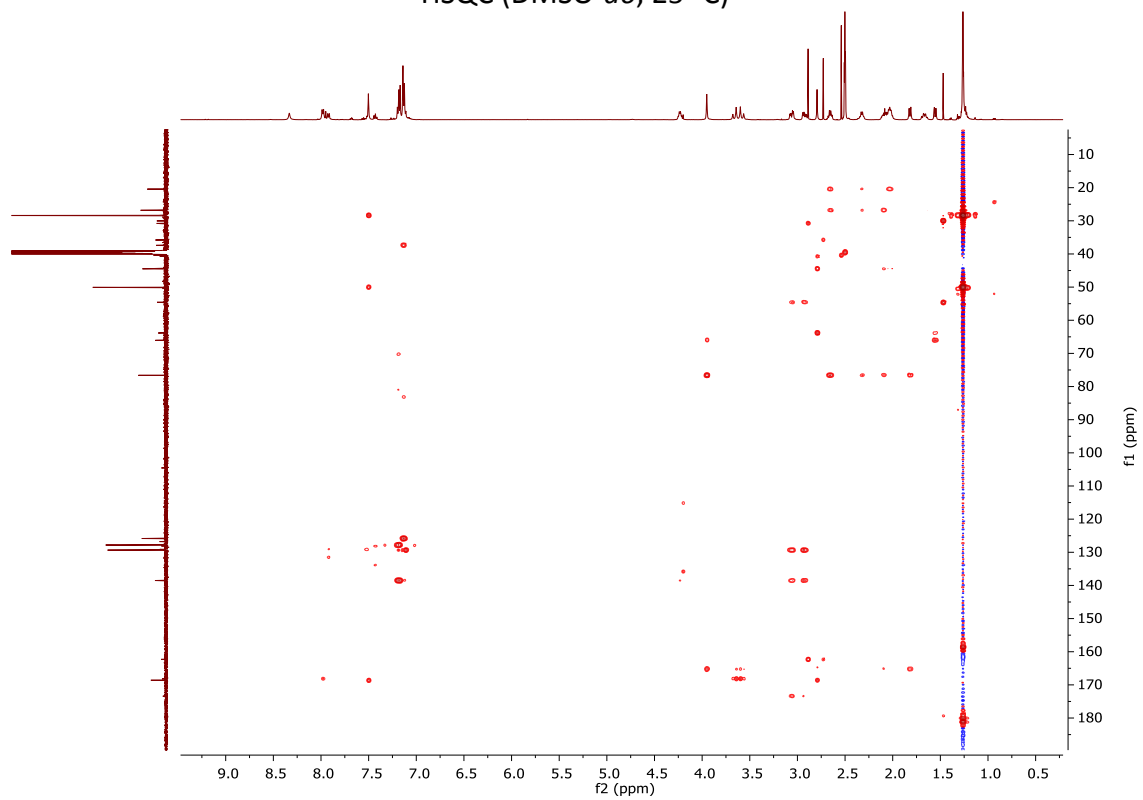

HMBC (DMSO-*d*<sub>6</sub>, 25 °C)

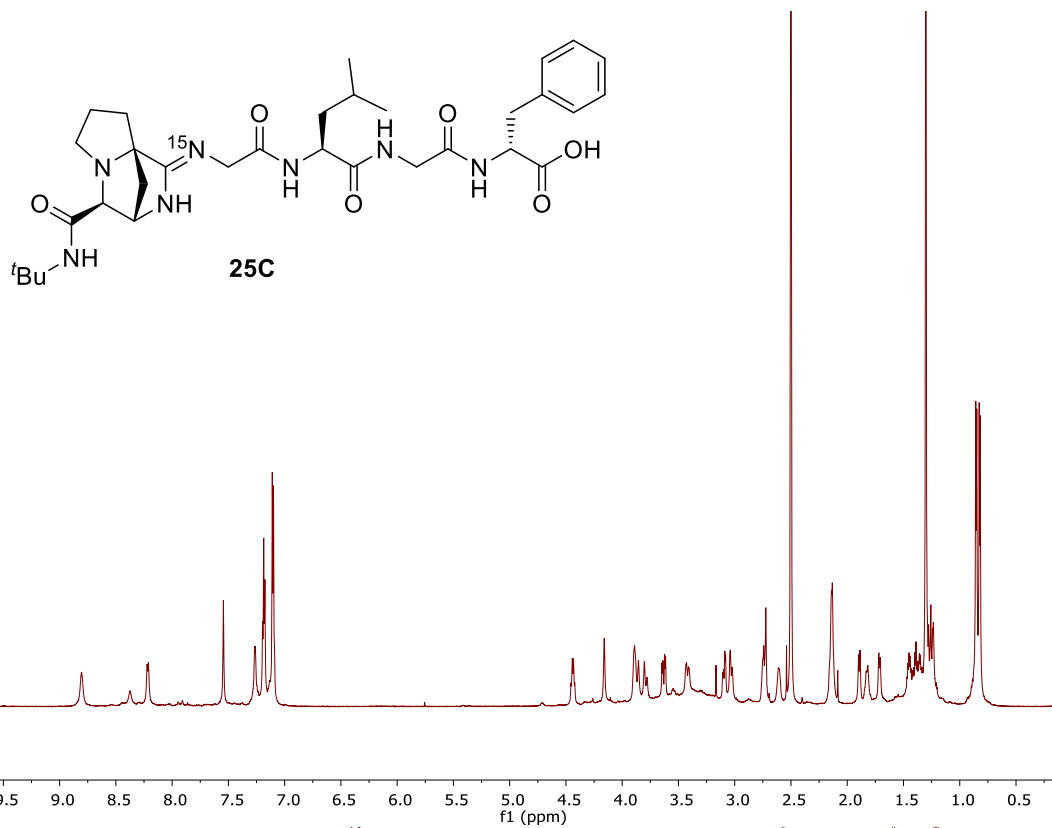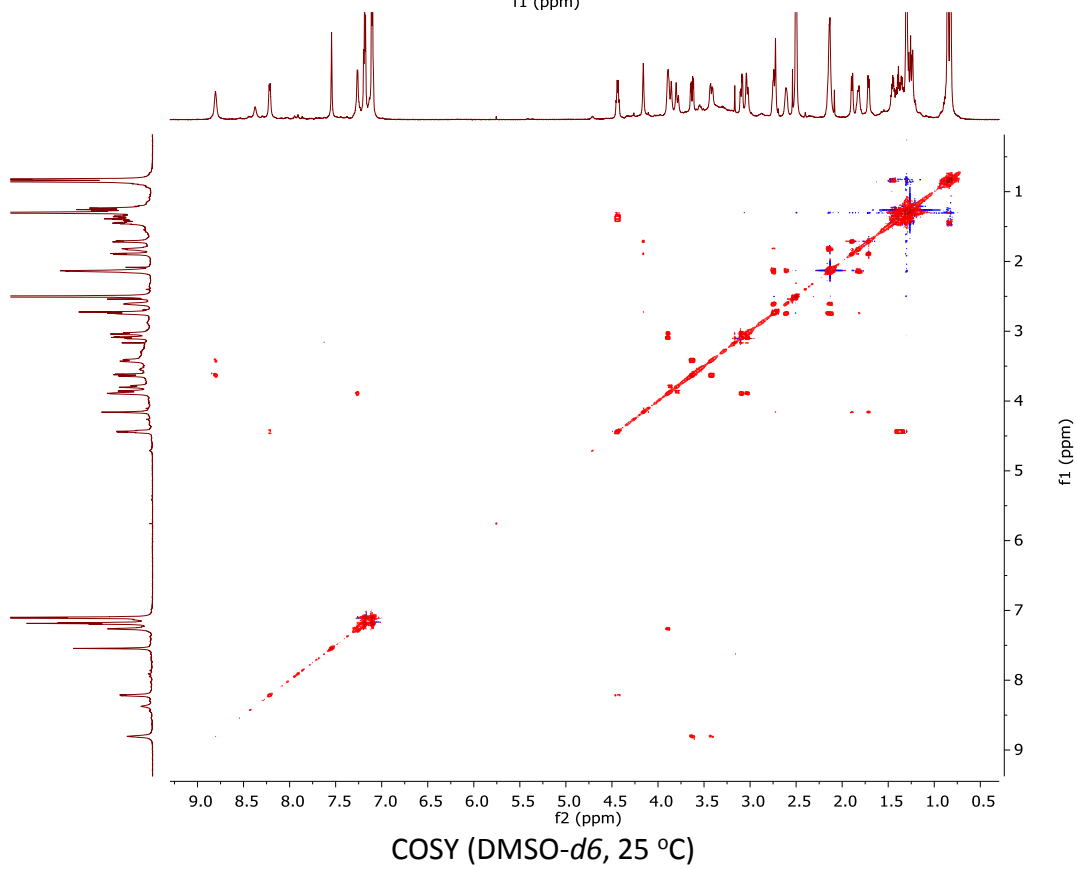

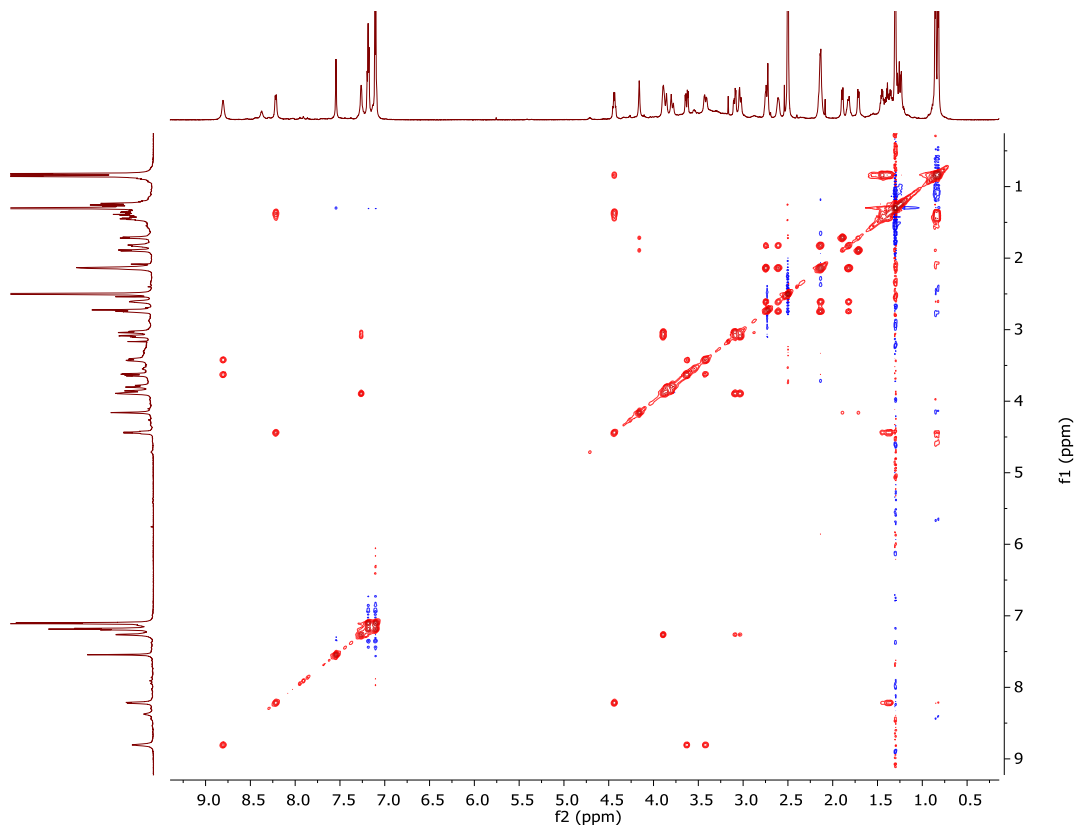

TOCSY (DMSO-*d*<sub>6</sub>, 25 °C)

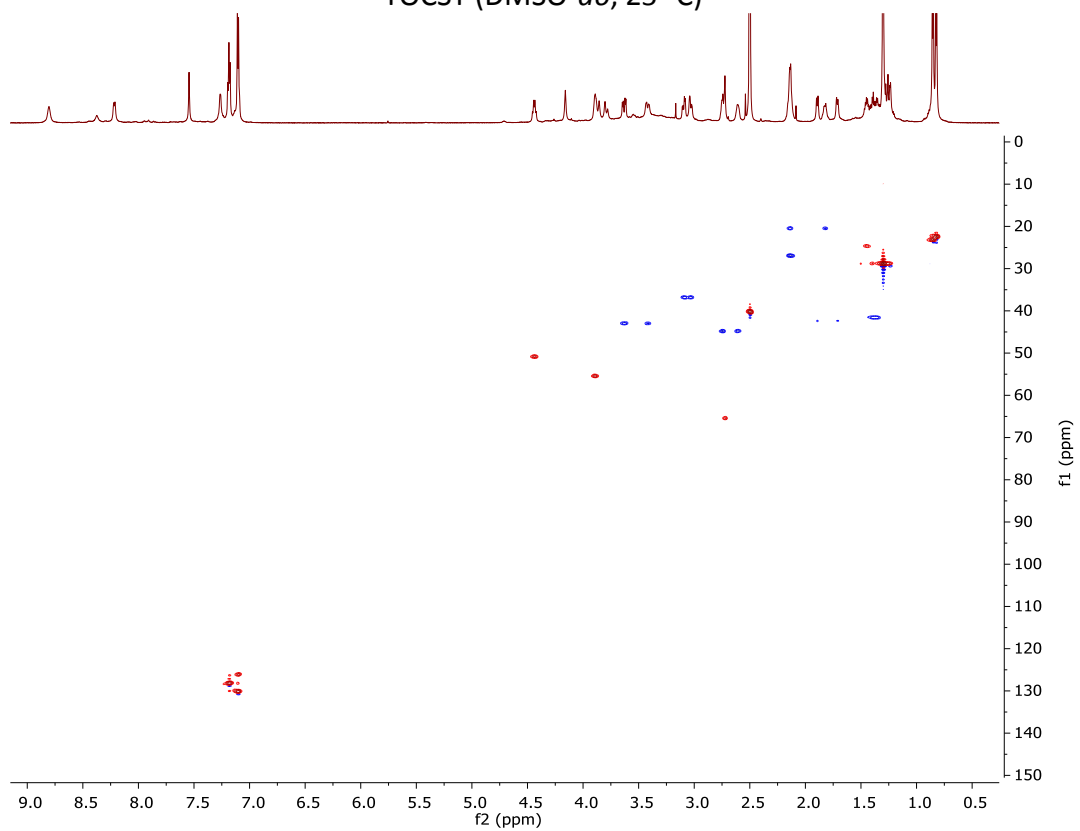

HSQC (DMSO-*d*<sub>6</sub>, 25 °C)

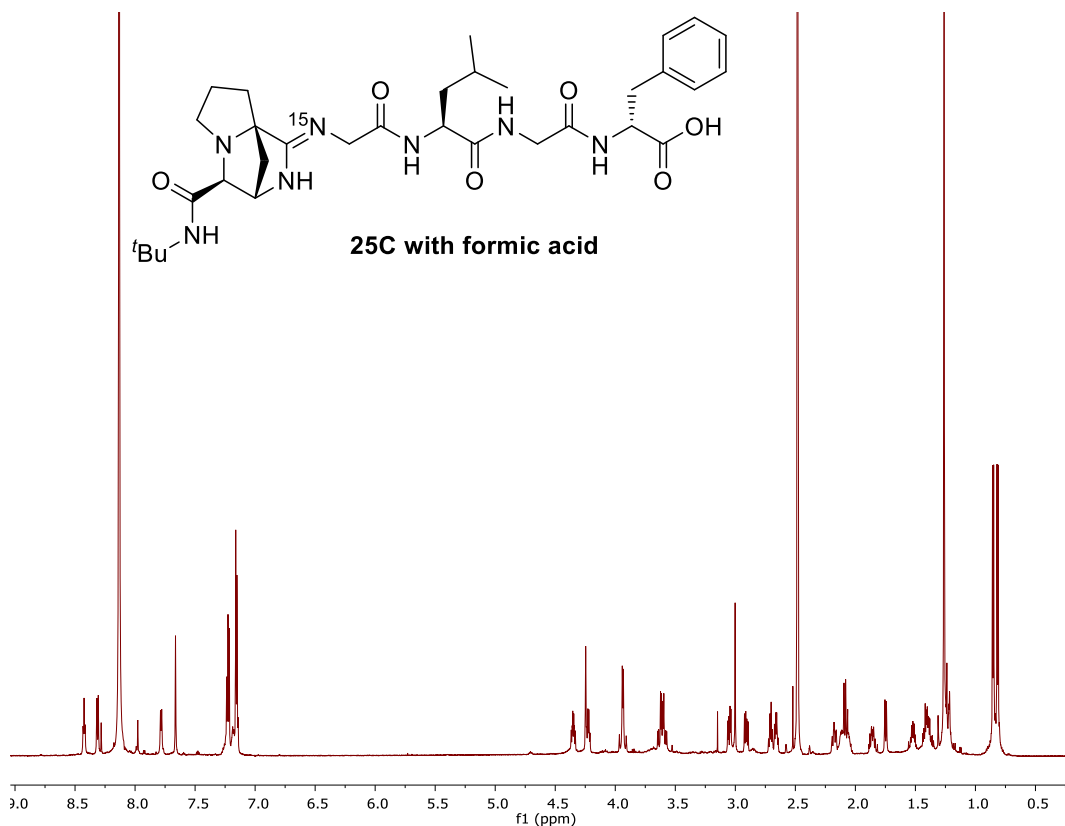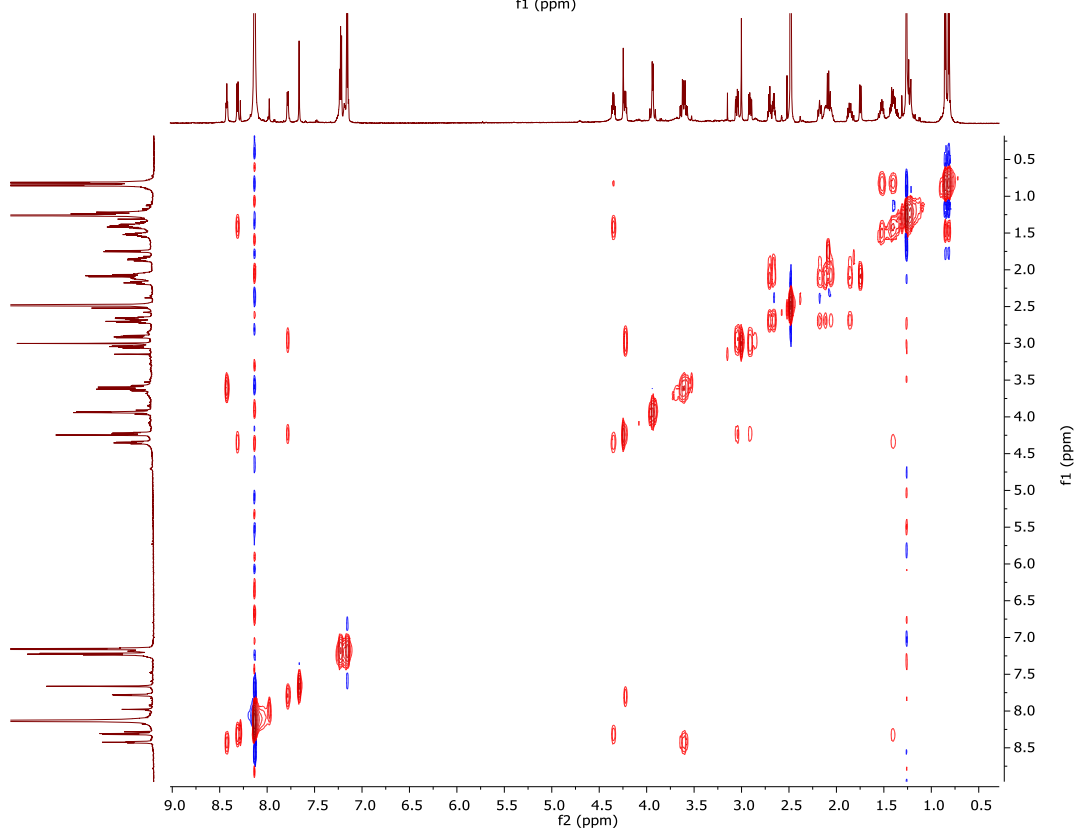

TOCSY (DMSO-*d*<sub>6</sub> + formic acid, 25 °C)

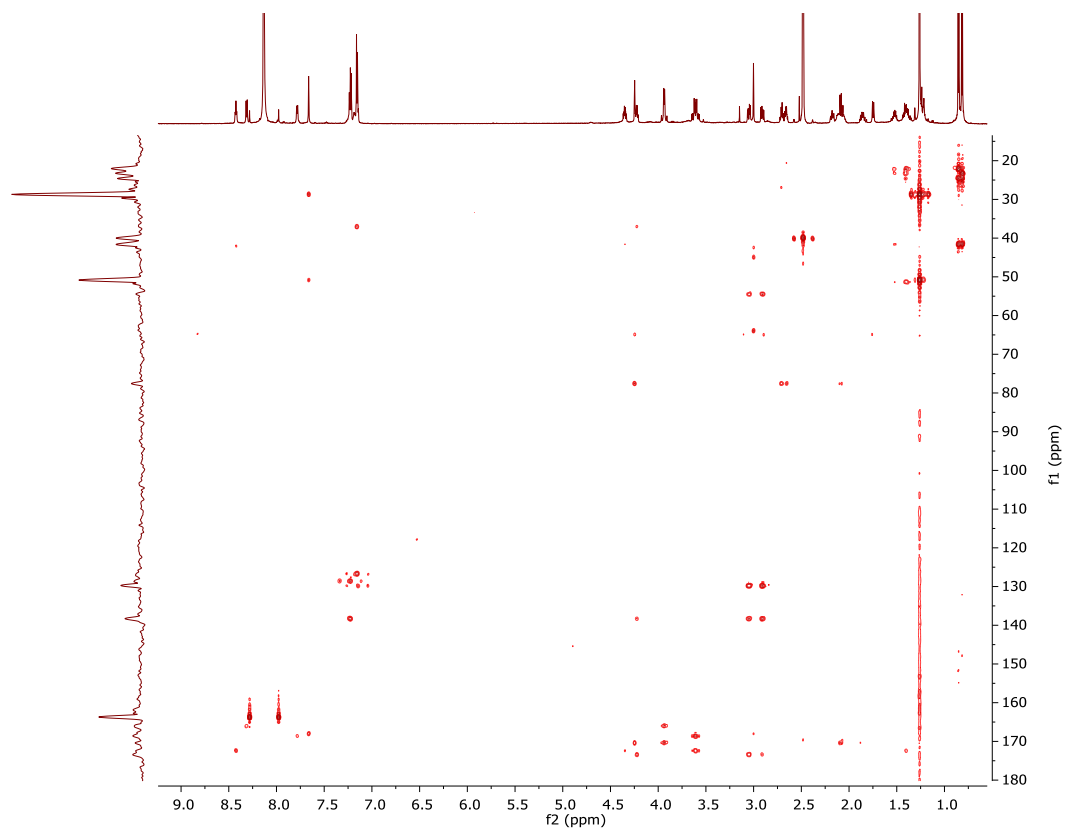

HMBC (DMSO-*d*6 + formic acid, 25 °C)

— 102.46

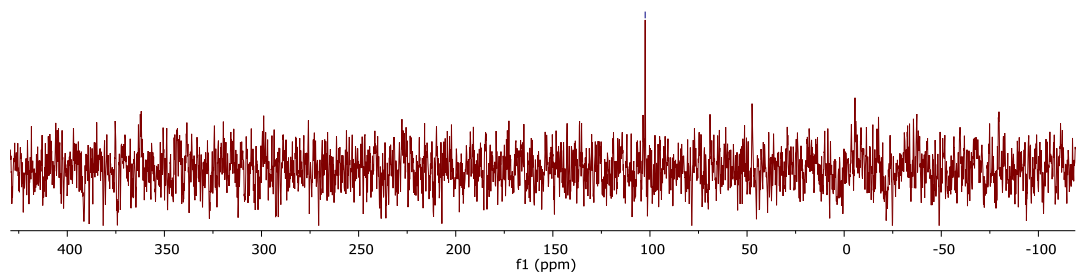

<sup>15</sup>N (DMSO-*d*6 + formic acid, 25 °C)

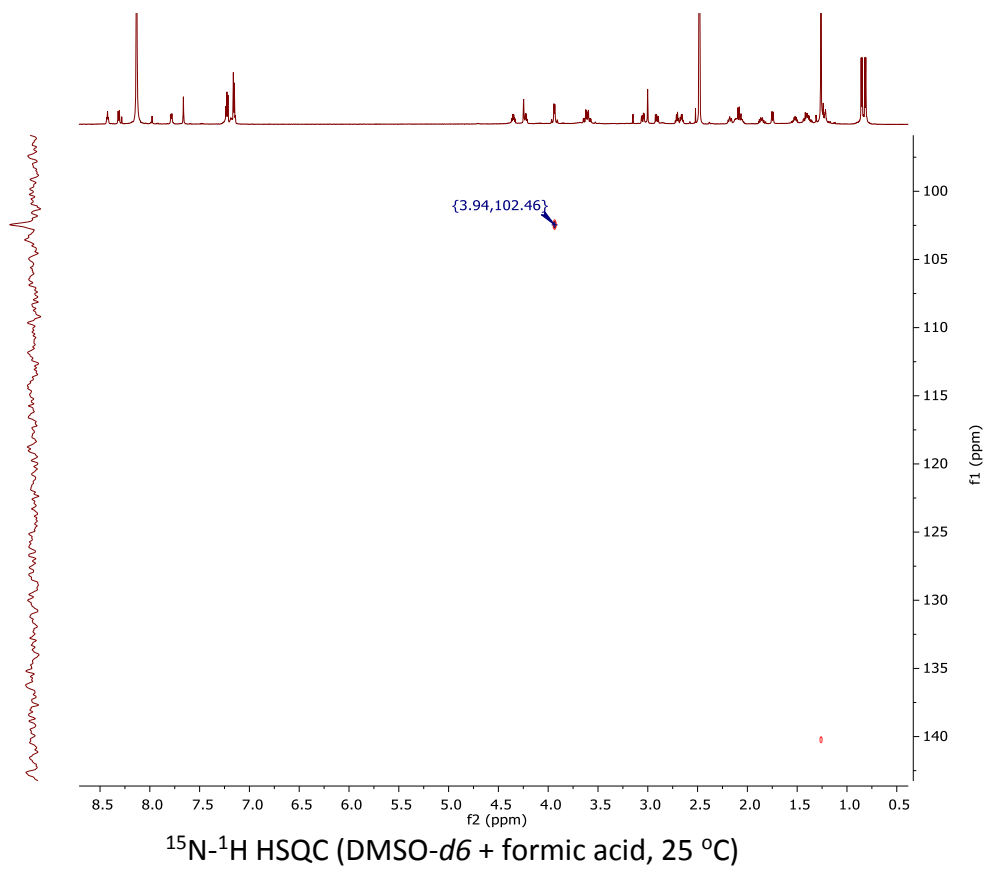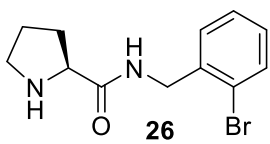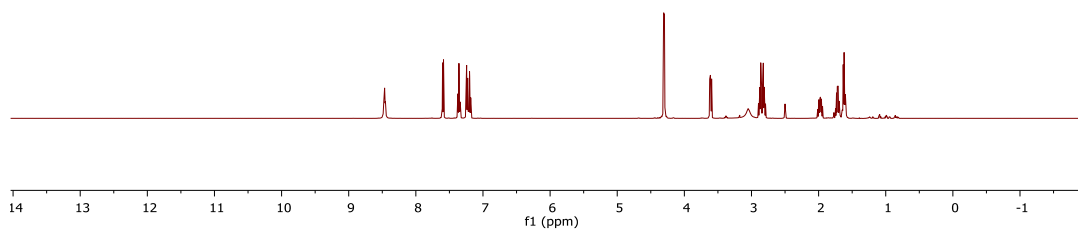



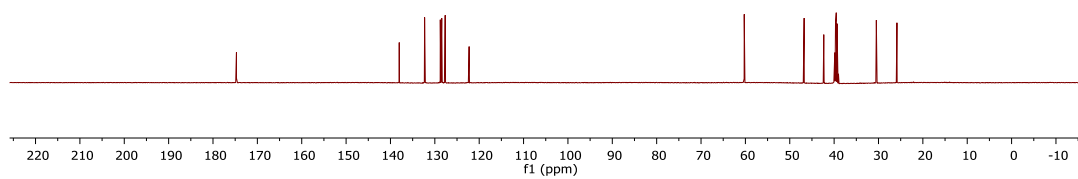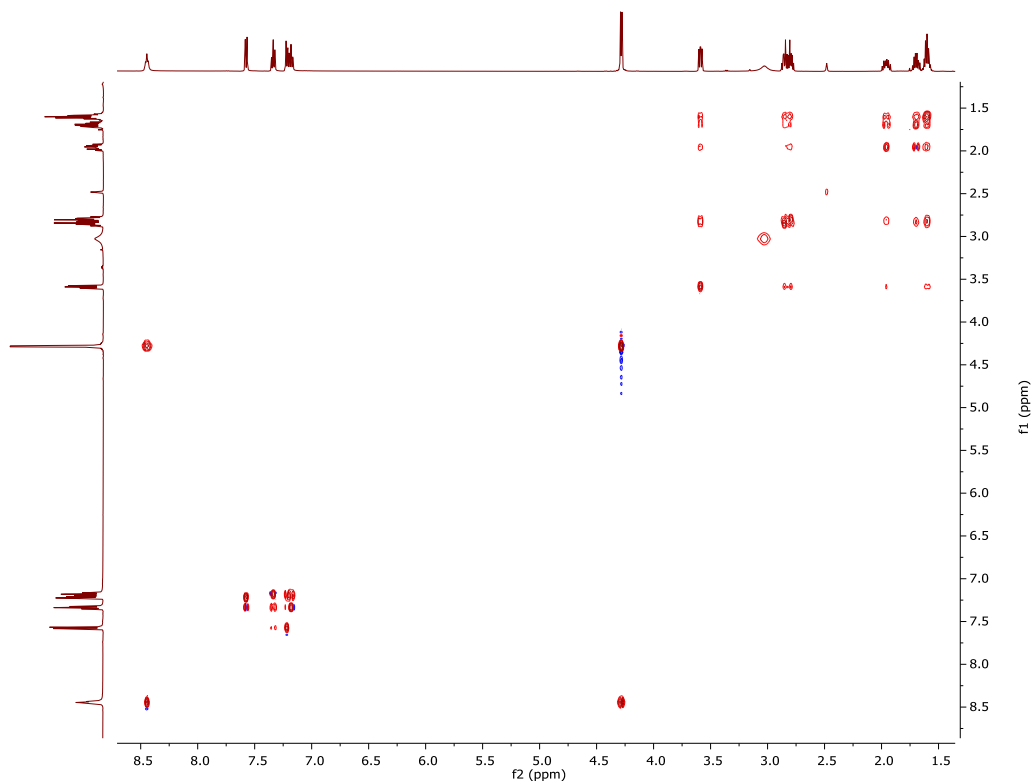

TOCSY (DMSO-*d*<sub>6</sub>, 25 °C)

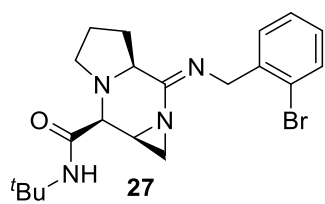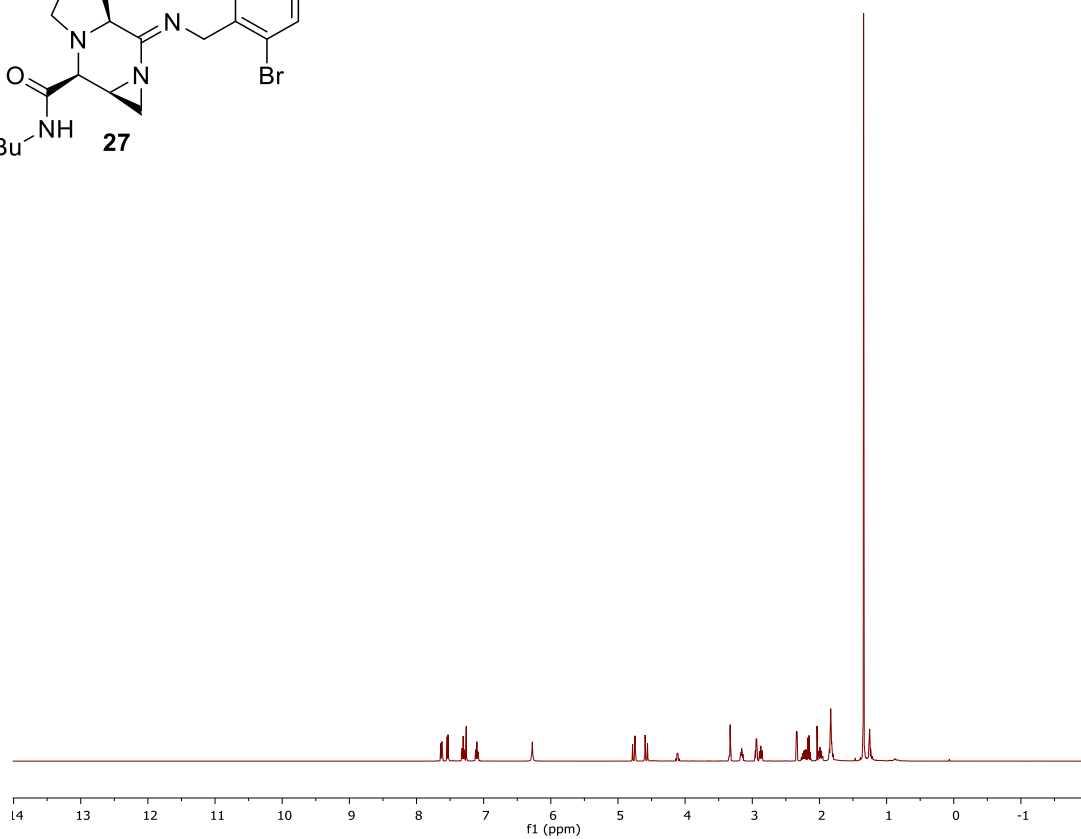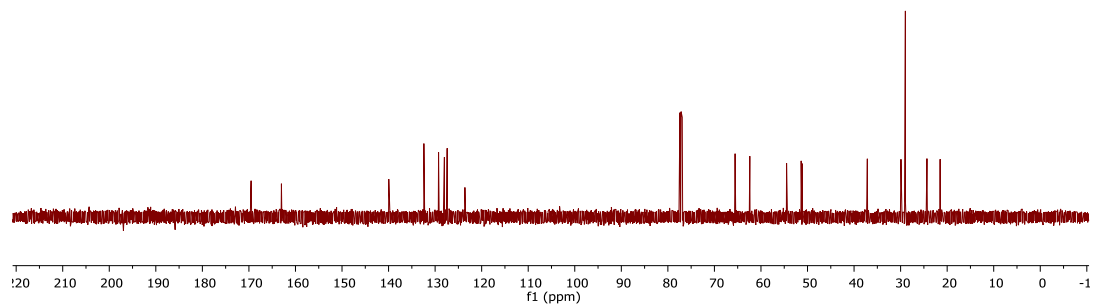

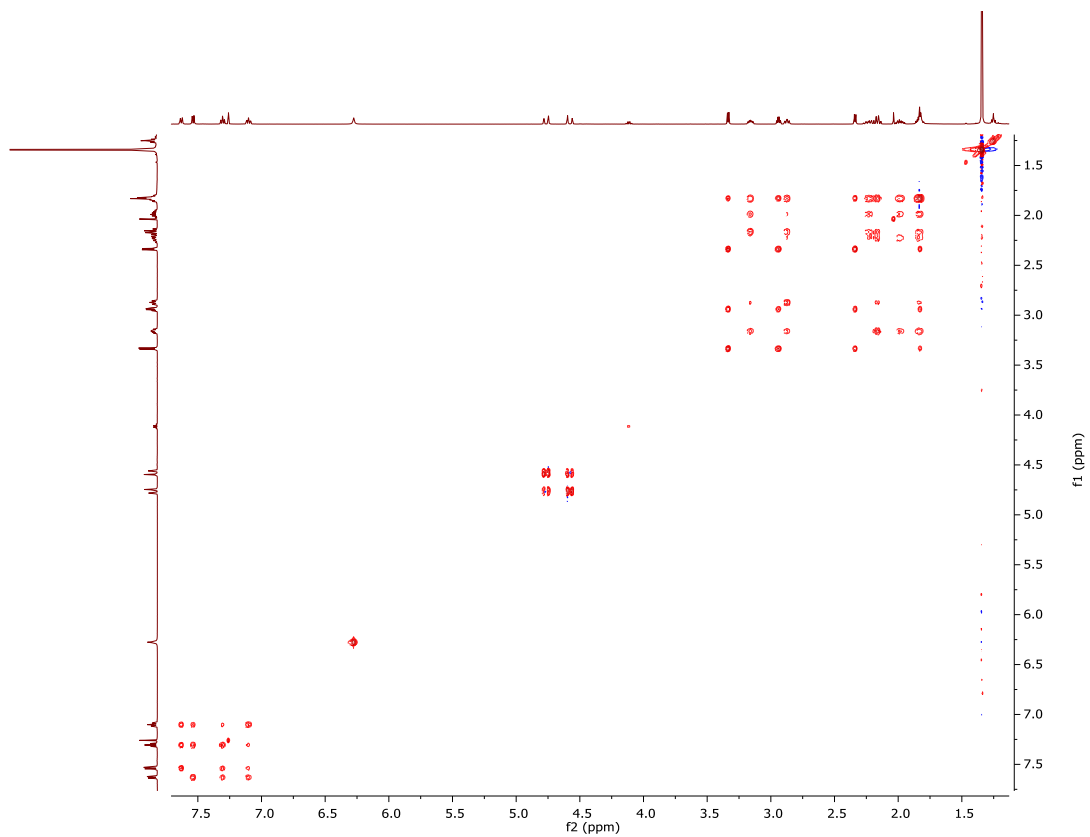

TOCSY (CDCl<sub>3</sub>, 25 °C)

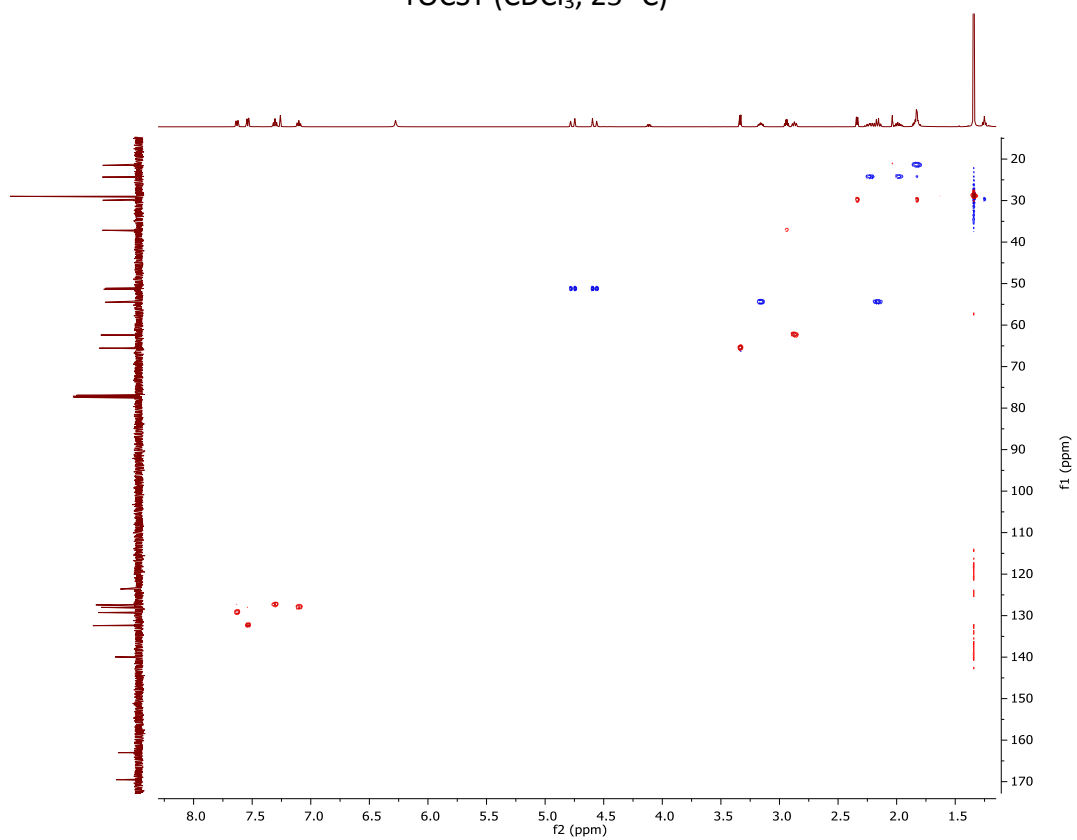

HSQC (CDCl<sub>3</sub>, 25 °C)

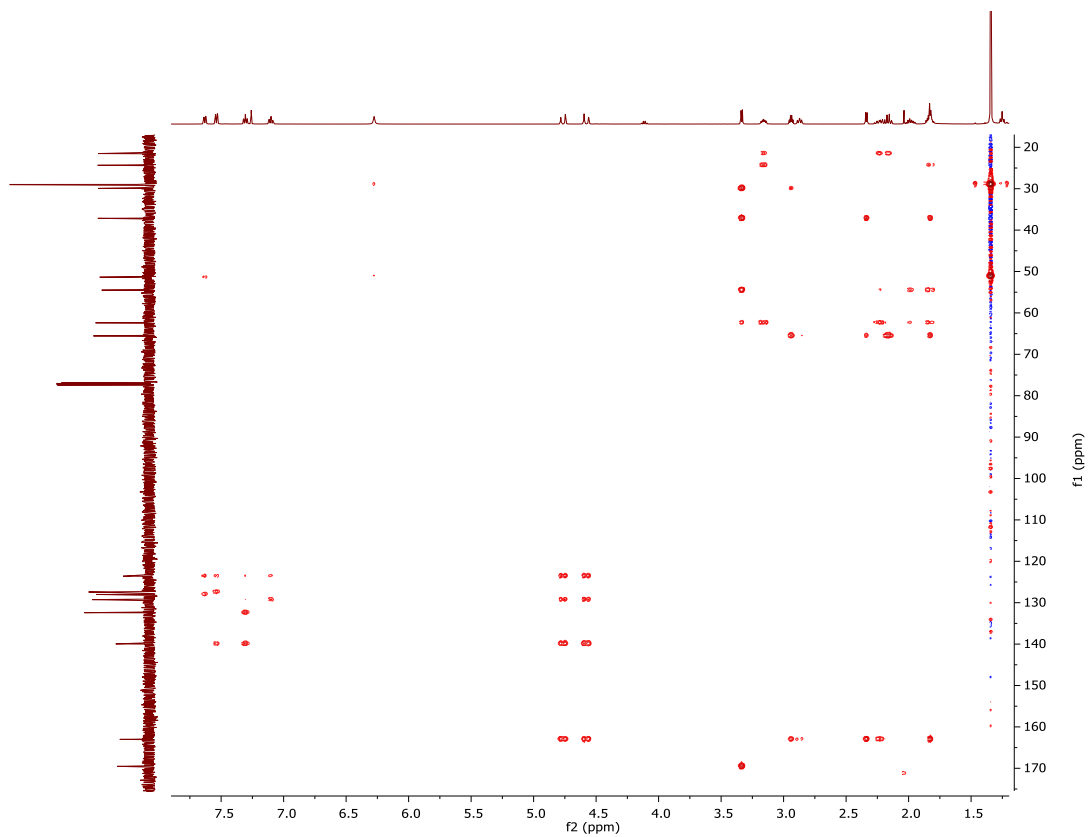

HMBC (CDCl<sub>3</sub>, 25 °C)

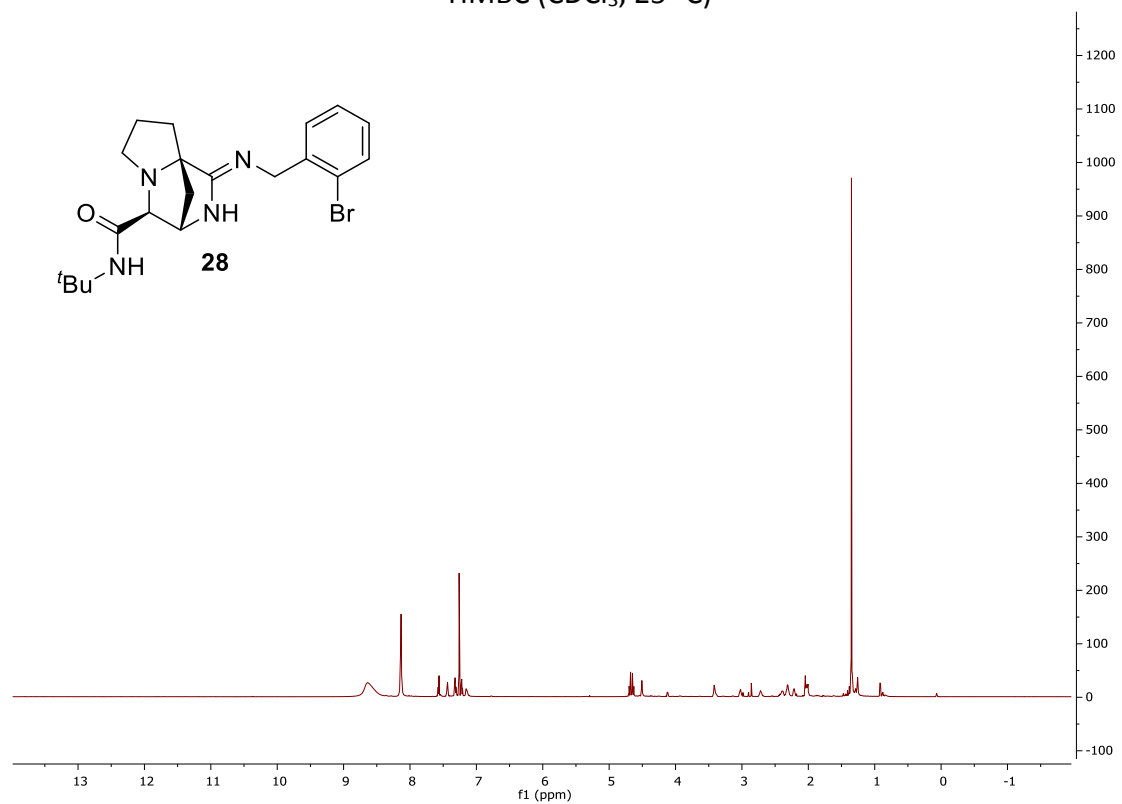

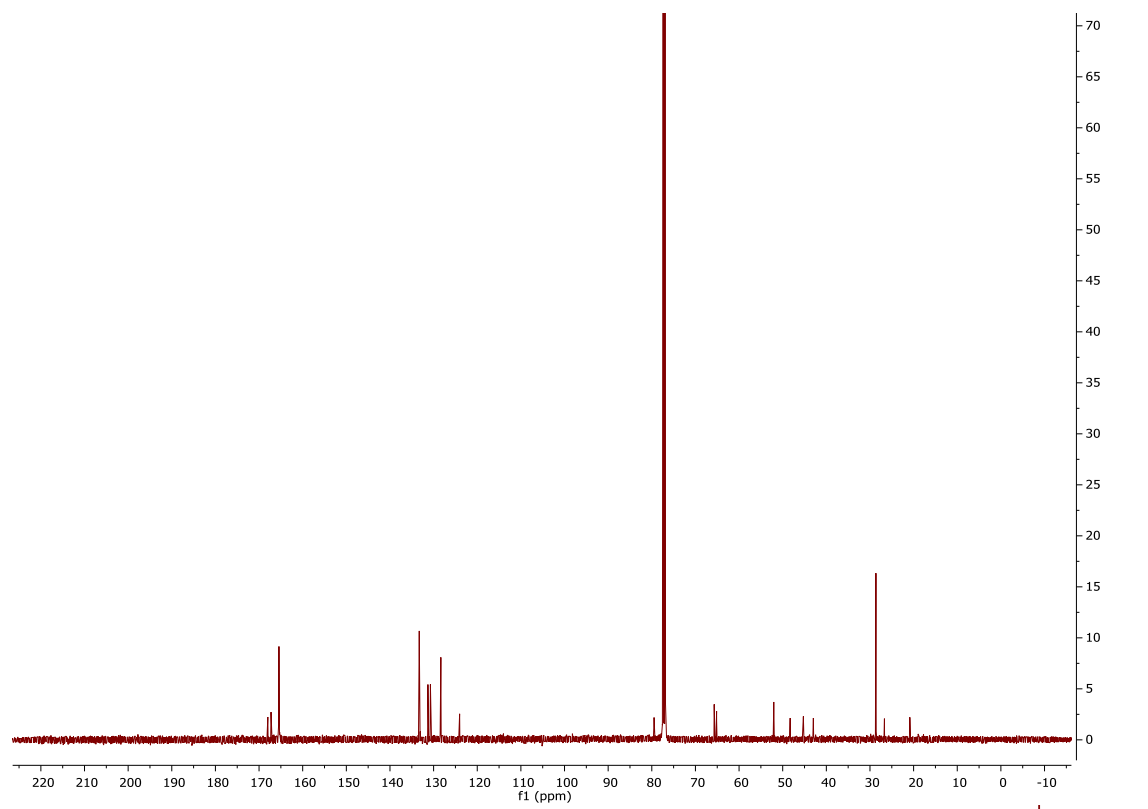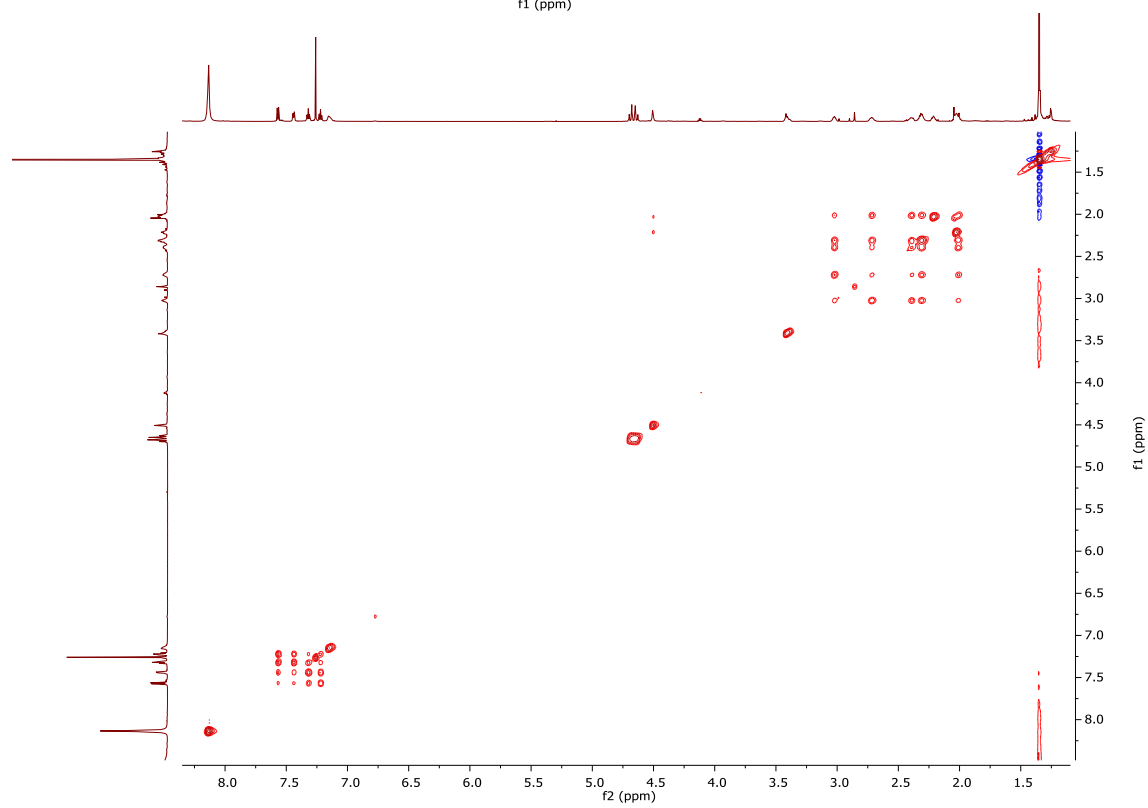

TOCSY (CDCl<sub>3</sub> + 0.3% formic acid, 25 °C)

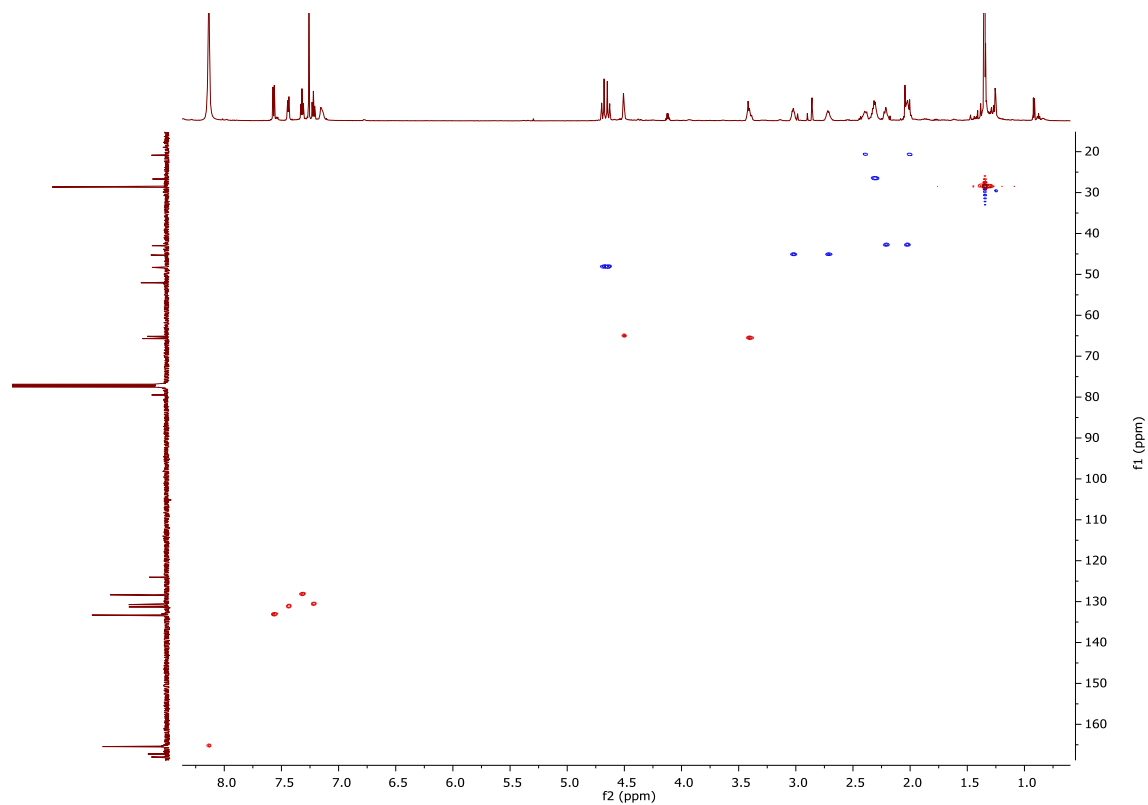

HSQC (CDCl<sub>3</sub> + 0.3% formic acid, 25 °C)

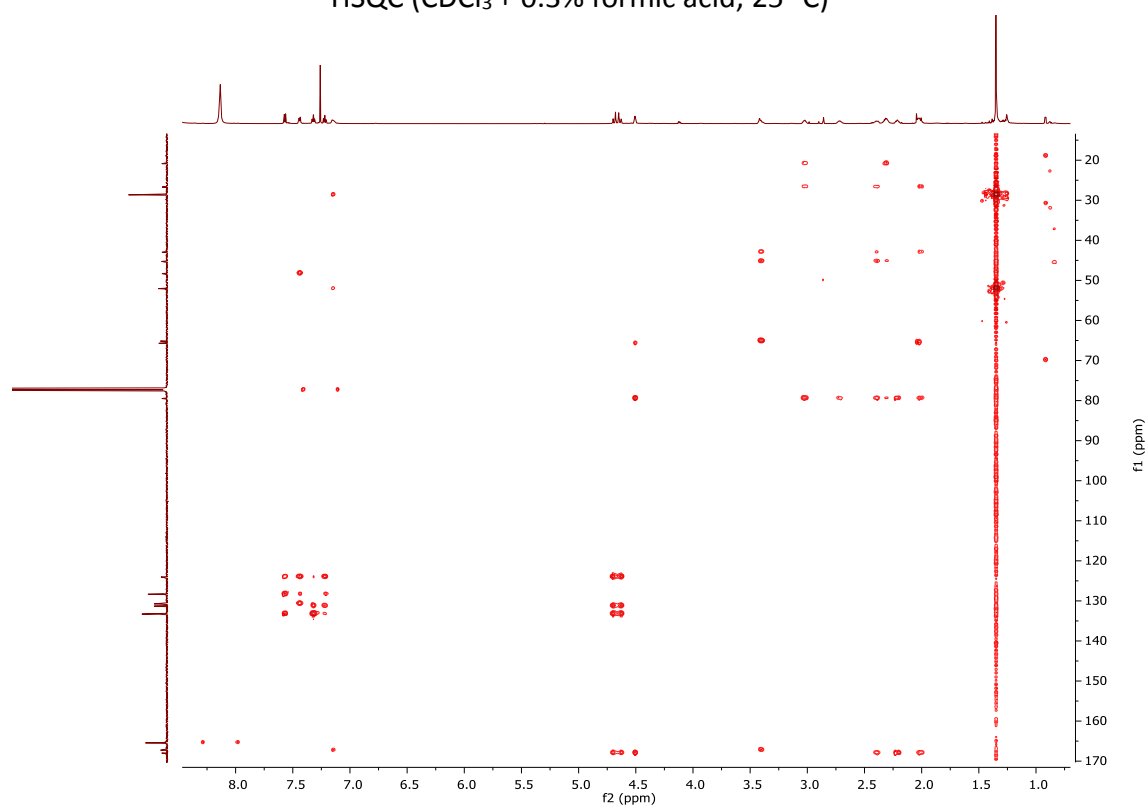

HMBC (CDCl<sub>3</sub> + 0.3% formic acid, 25 °C)

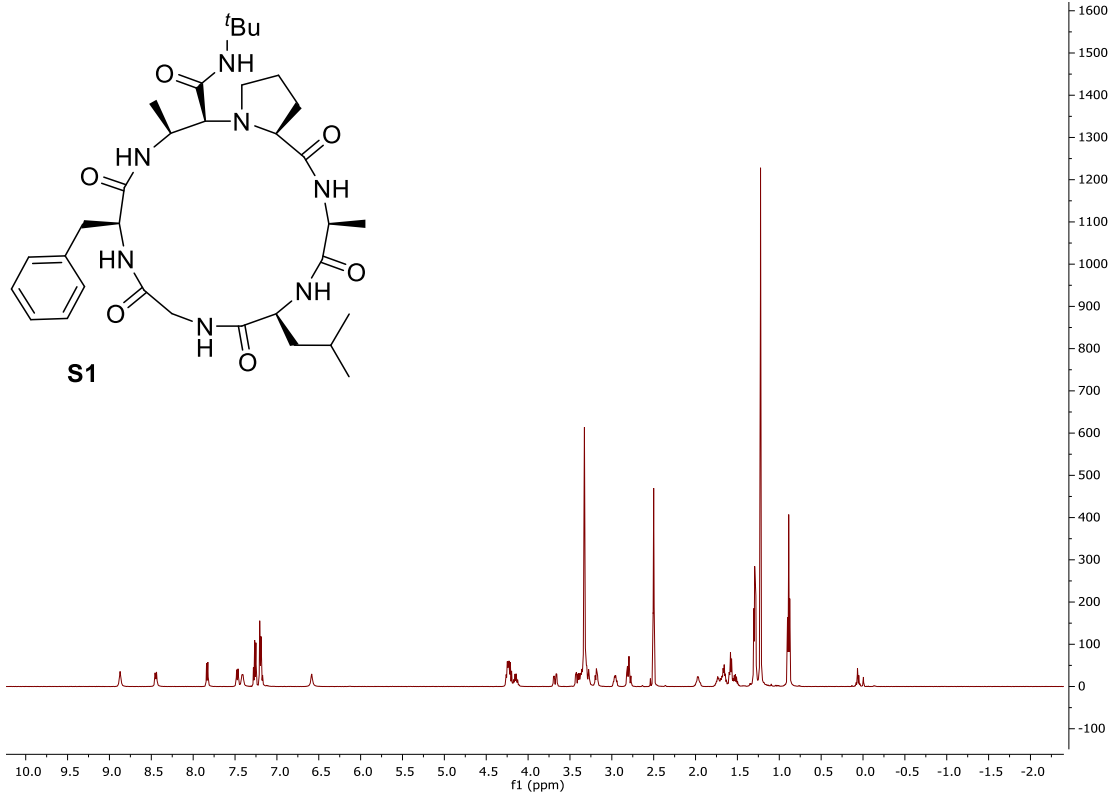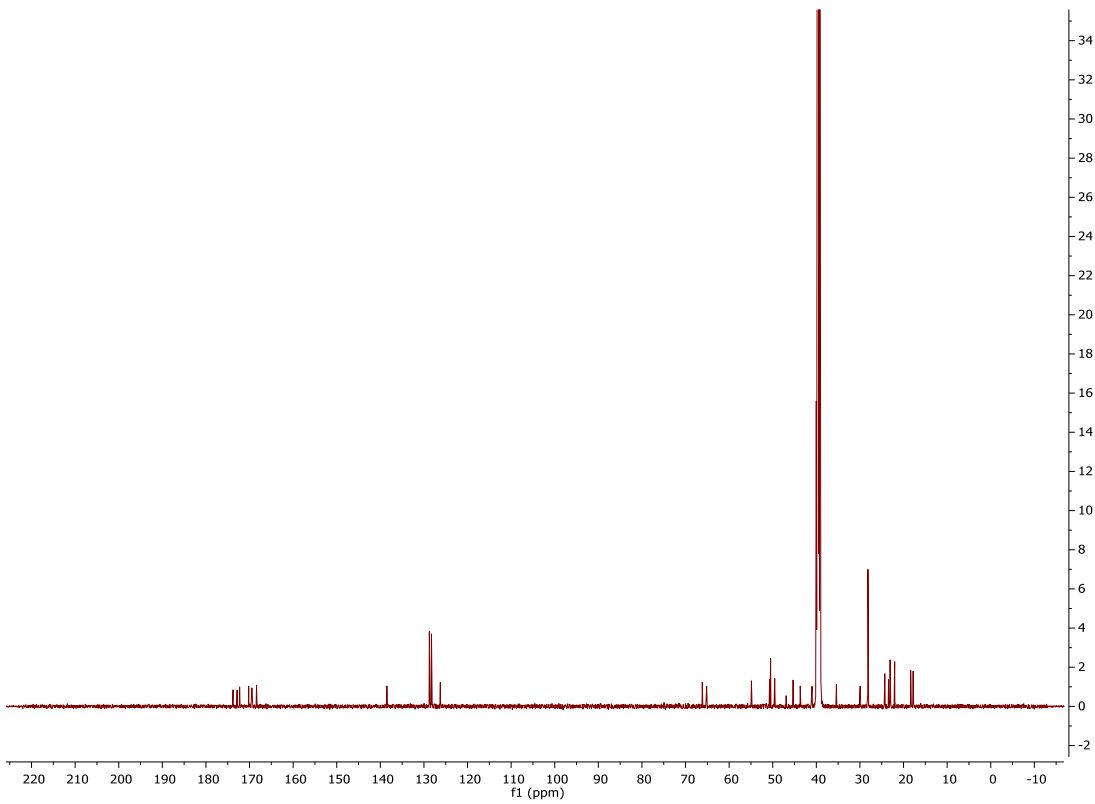

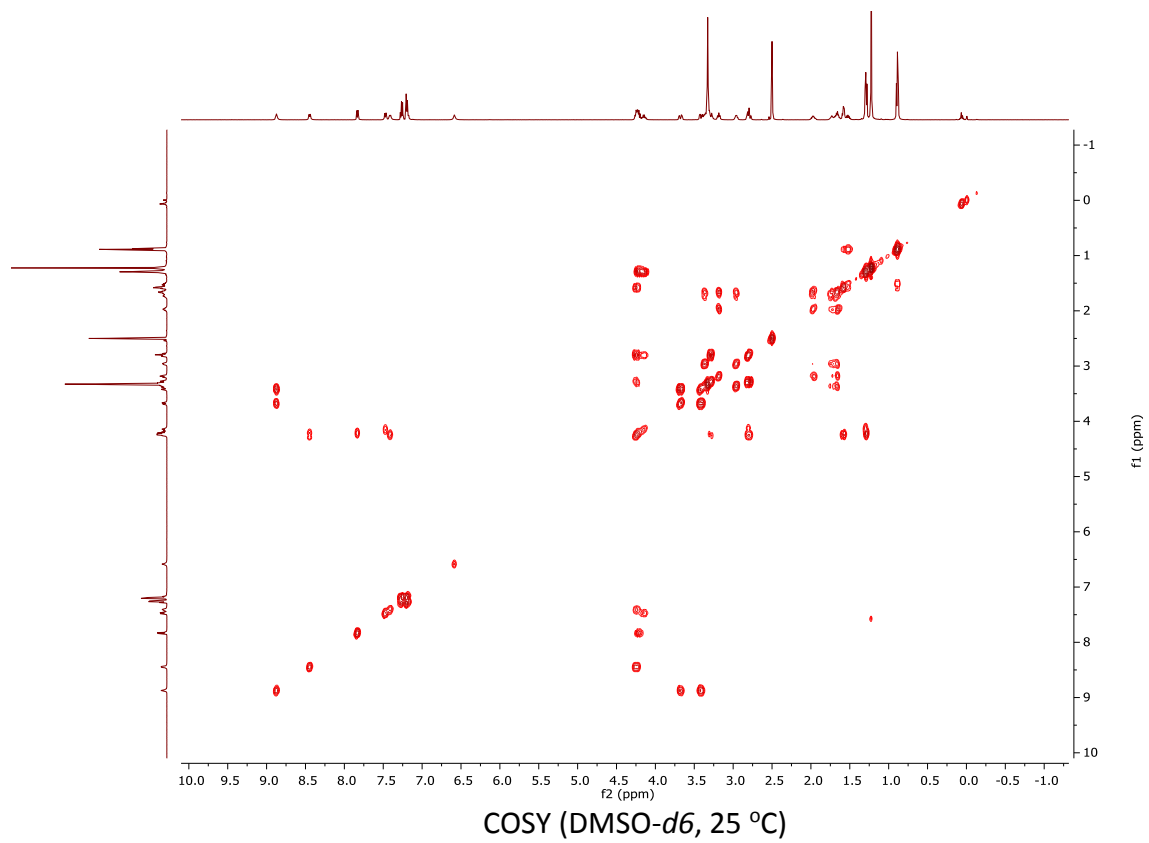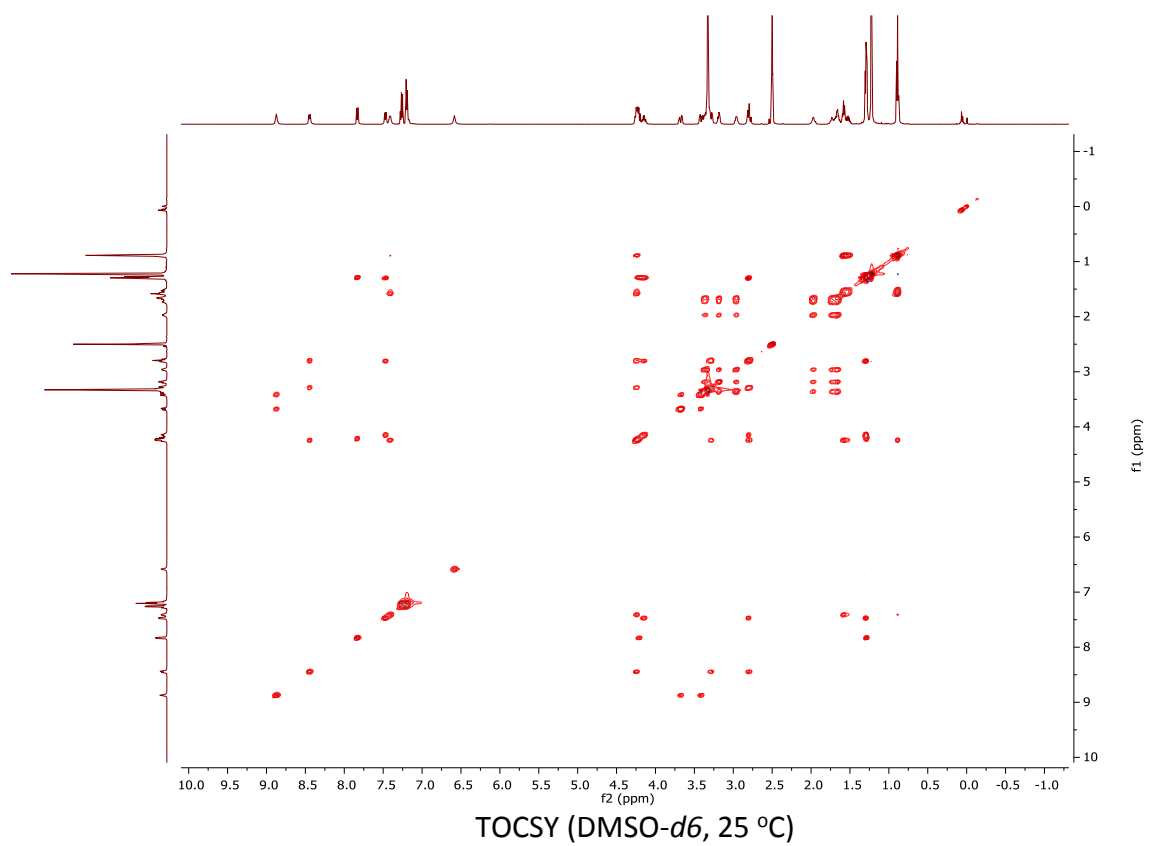



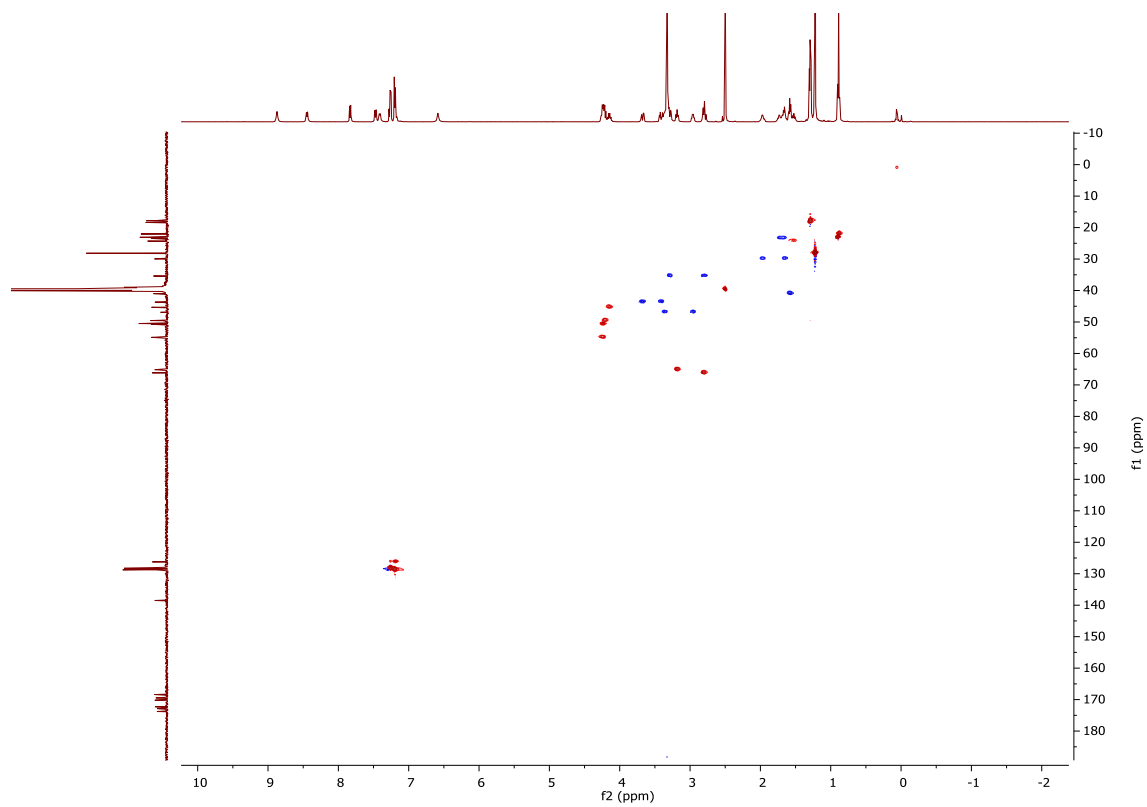

HSQC (DMSO-*d*<sub>6</sub>, 25 °C)

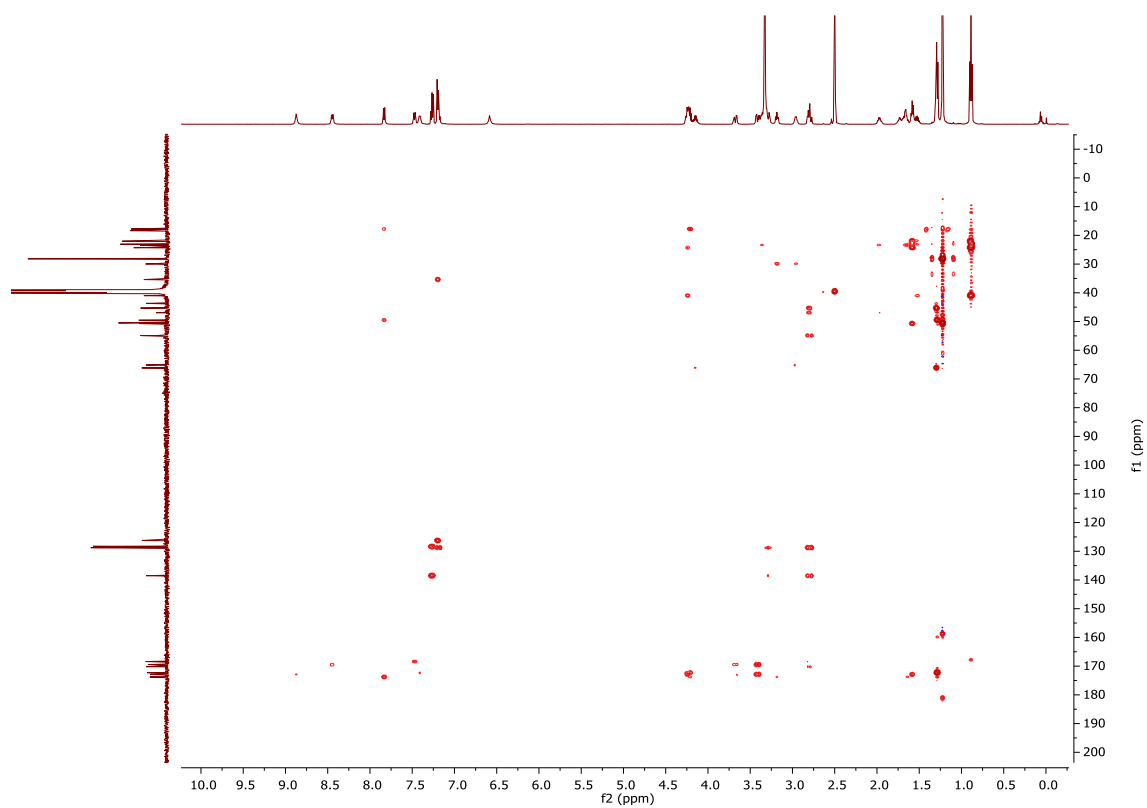

HMBC (DMSO-*d*<sub>6</sub>, 25 °C)

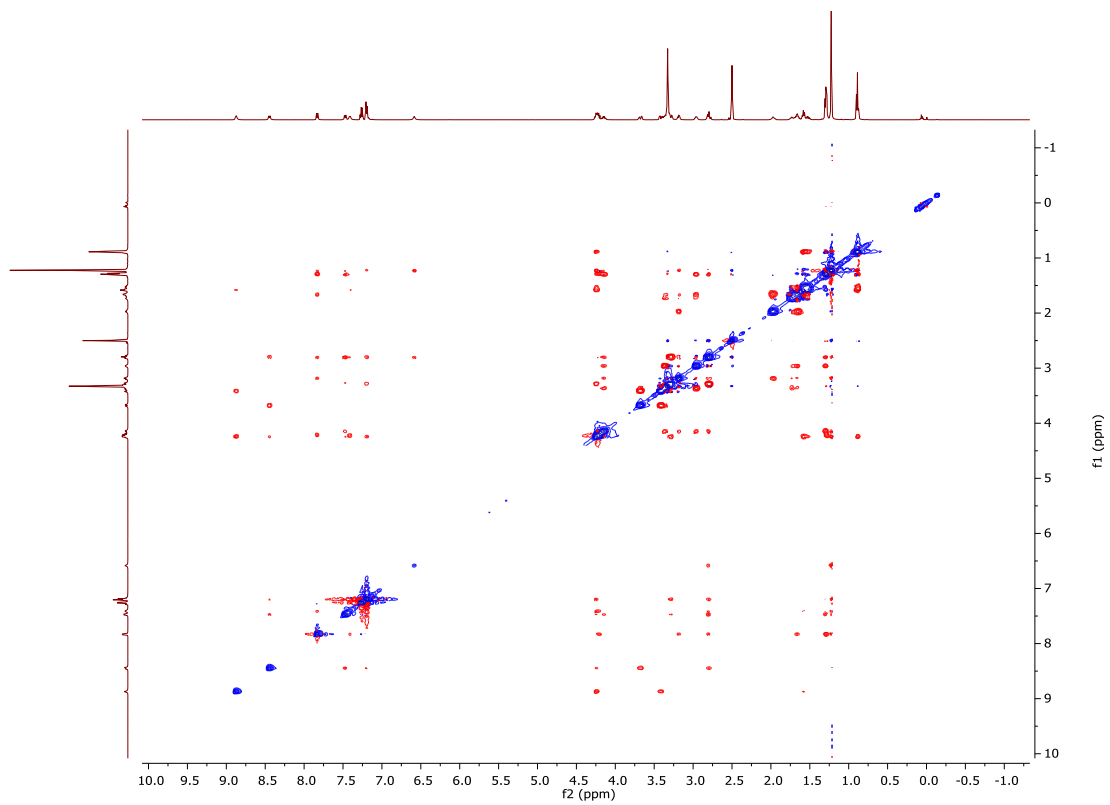

ROESY (DMSO- $d_6$ ) @ 25°C, 250 ms mixing time

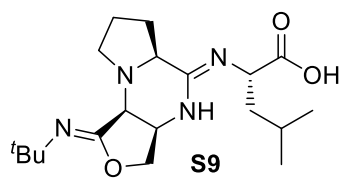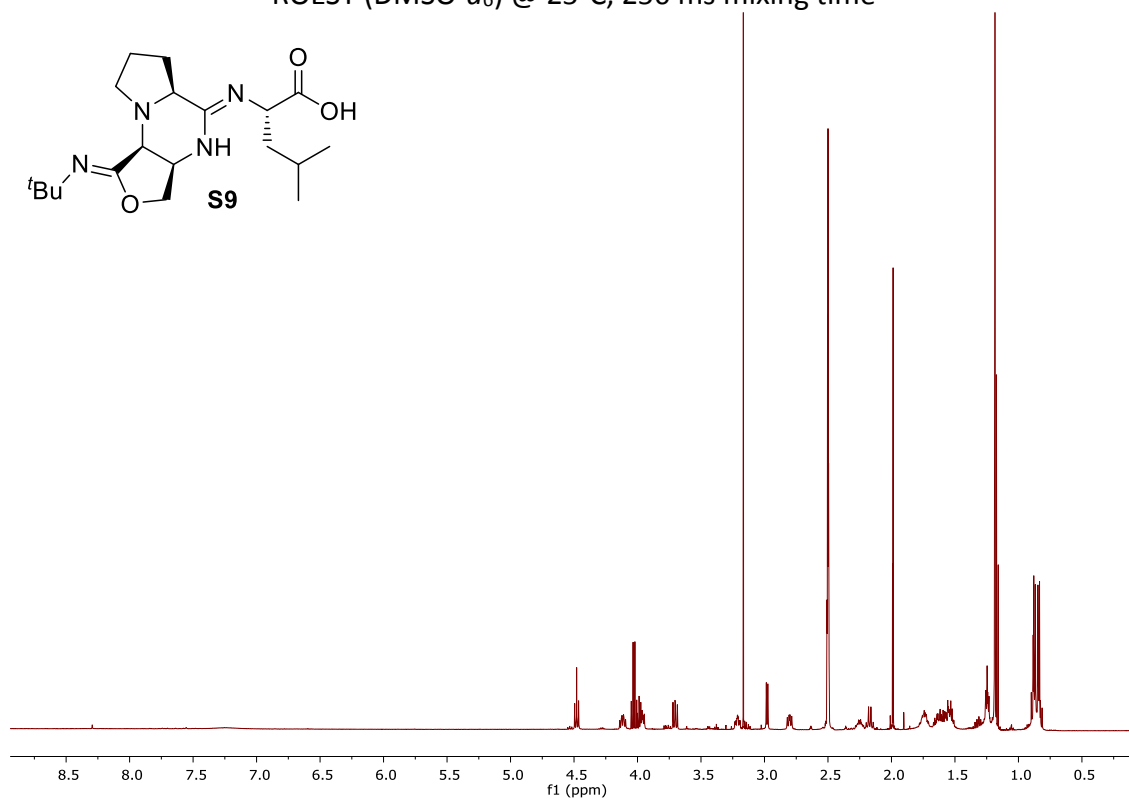

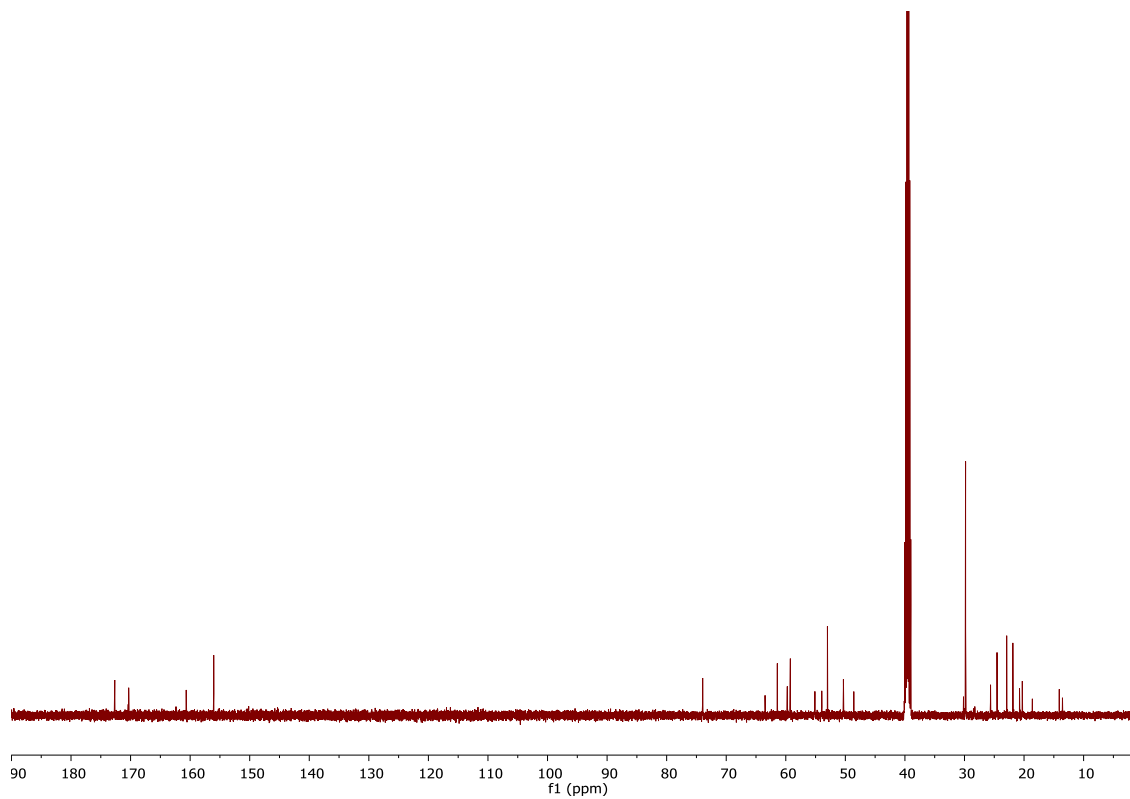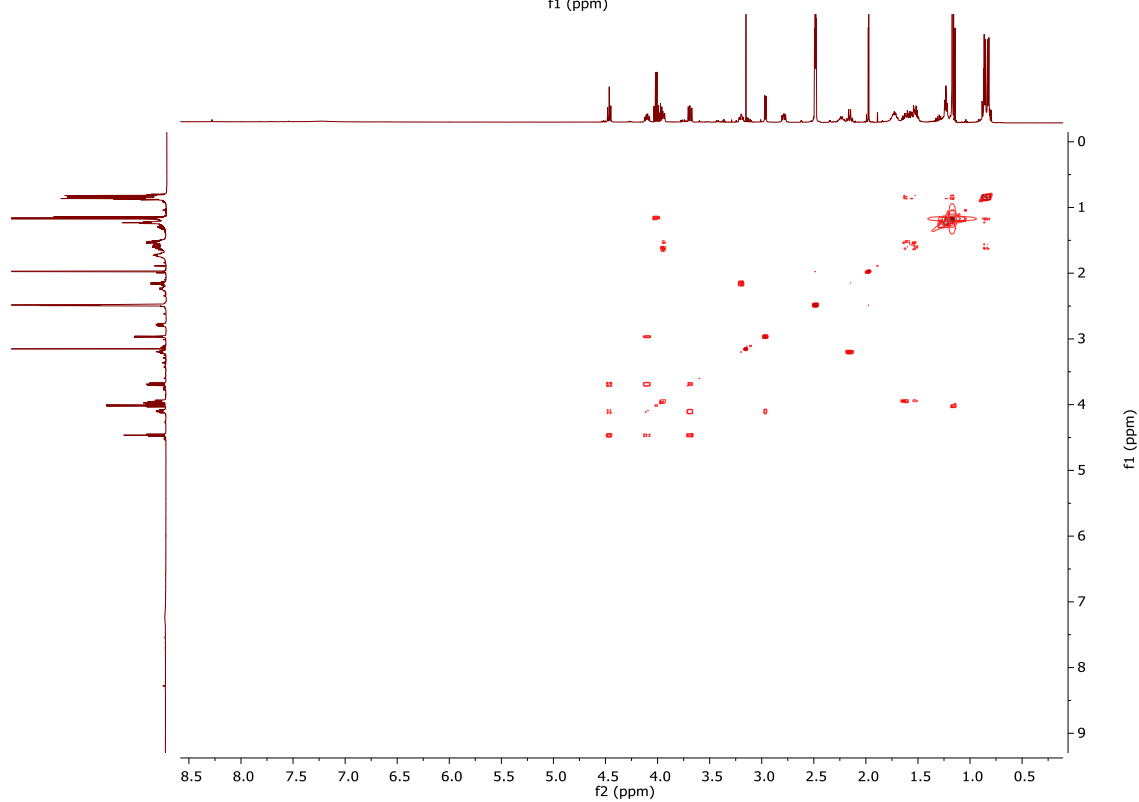

COSY (DMSO-*d*<sub>6</sub>, 25 °C)

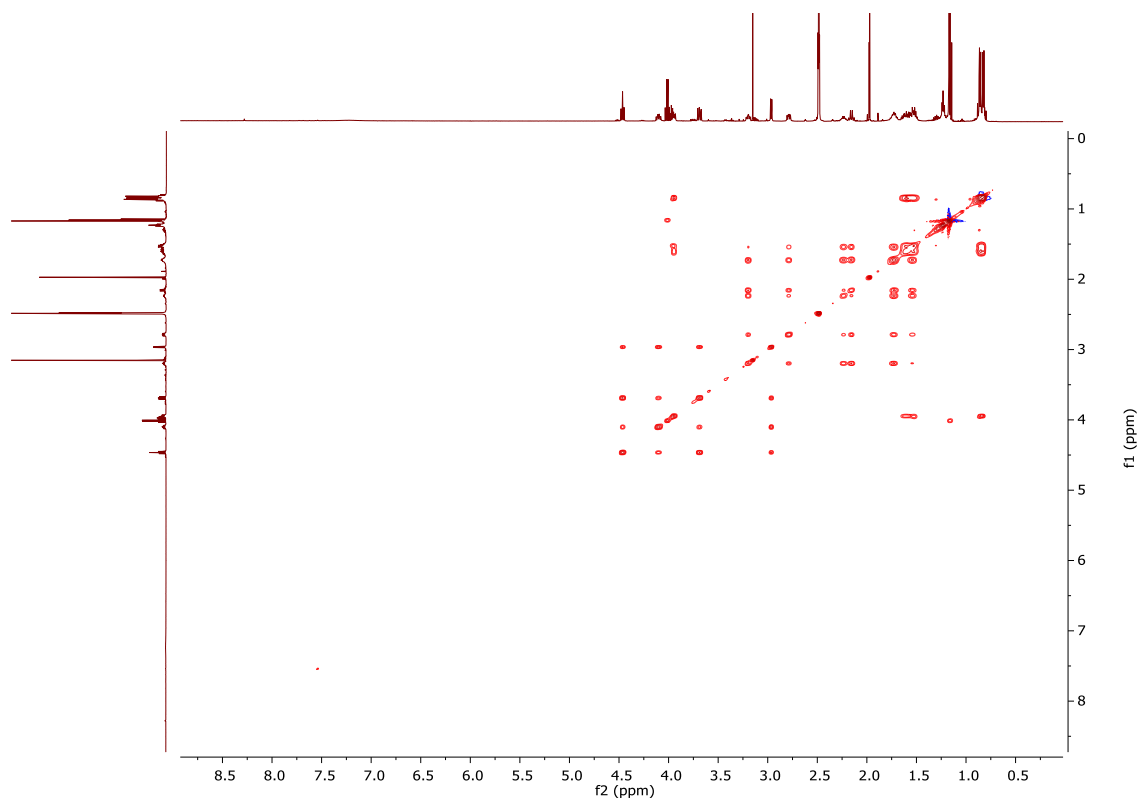

TOCSY (DMSO-*d*<sub>6</sub>, 25 °C)

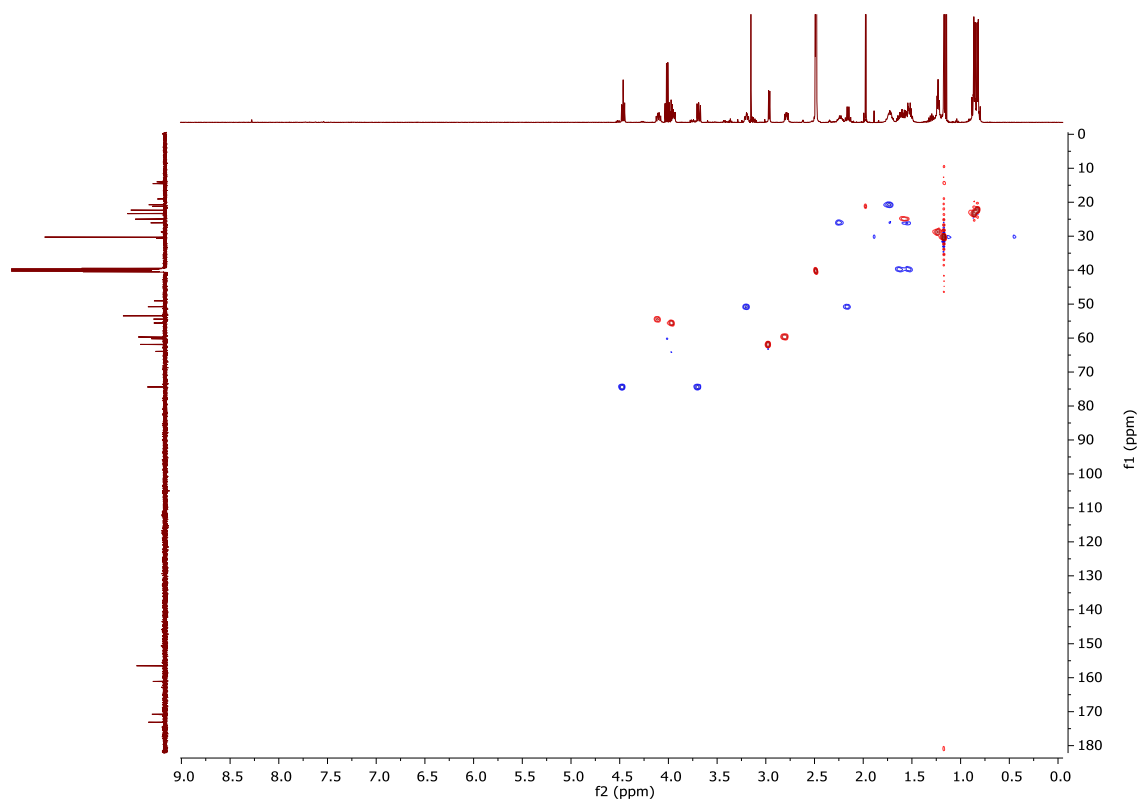

HSQC (DMSO-*d*<sub>6</sub>, 25 °C)

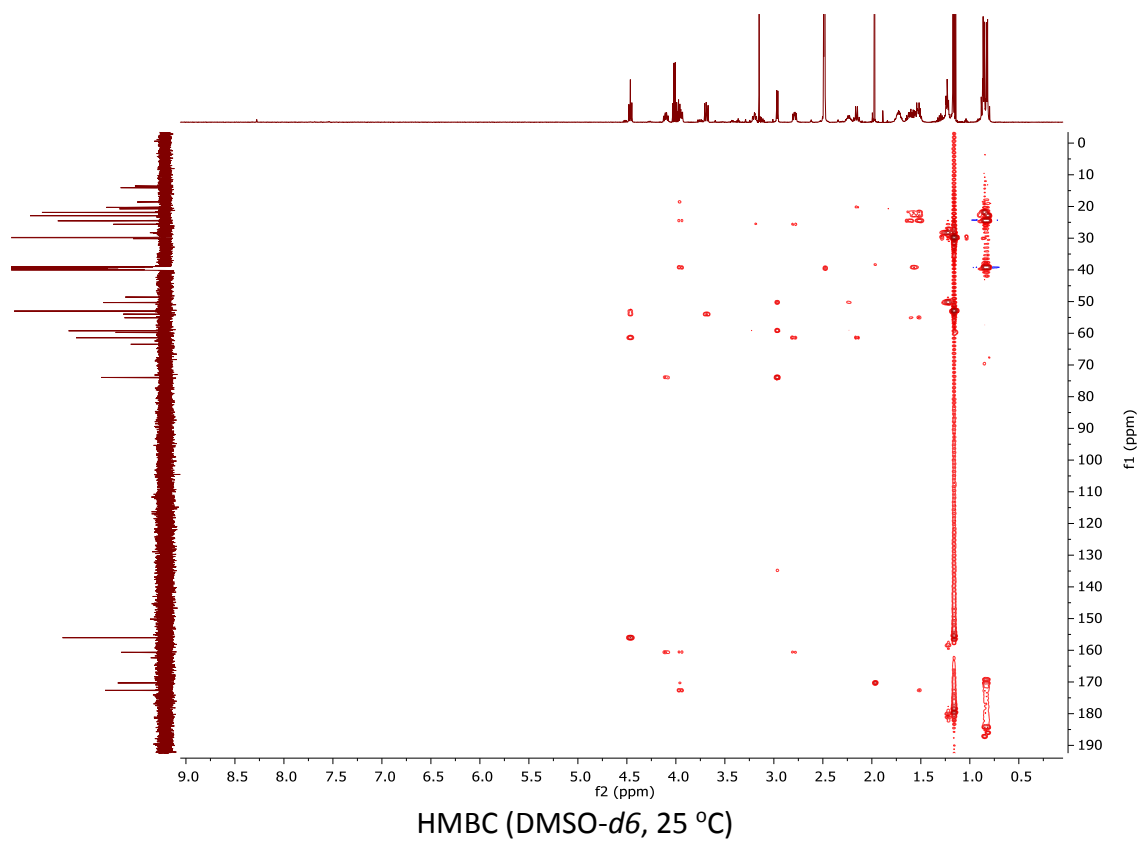

## Crystallographic data

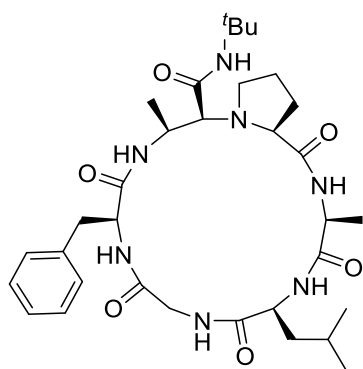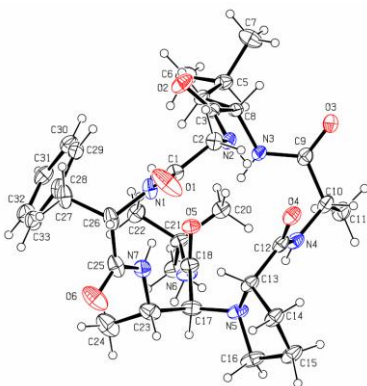

### c\*[PALGF] (S1)

Table 1. Crystal data and structure refinement for d13160\_sq\_d\_x.

|                                 |                                             |                                |
|---------------------------------|---------------------------------------------|--------------------------------|
| Identification code             | d13160_sq_d                                 |                                |
| Empirical formula               | C33 H53 N7 O7                               |                                |
| Formula weight                  | 659.82                                      |                                |
| Temperature                     | 147(2) K                                    |                                |
| Wavelength                      | 1.54178 Å                                   |                                |
| Crystal system                  | Monoclinic                                  |                                |
| Space group                     | P 21                                        |                                |
| Unit cell dimensions            | a = 10.0804(3) Å                            | $\alpha = 90^\circ$ .          |
|                                 | b = 9.9982(3) Å                             | $\beta = 103.2990(17)^\circ$ . |
|                                 | c = 19.7575(6) Å                            | $\gamma = 90^\circ$ .          |
| Volume                          | 1937.88(10) Å <sup>3</sup>                  |                                |
| Z                               | 2                                           |                                |
| Density (calculated)            | 1.131 Mg/m <sup>3</sup>                     |                                |
| Absorption coefficient          | 0.654 mm <sup>-1</sup>                      |                                |
| F(000)                          | 712                                         |                                |
| Crystal size                    | 0.100 x 0.060 x 0.050 mm <sup>3</sup>       |                                |
| Theta range for data collection | 2.298 to 66.745°.                           |                                |
| Index ranges                    | -11 ≤ h ≤ 11, -11 ≤ k ≤ 11, -23 ≤ l ≤ 23    |                                |
| Reflections collected           | 36769                                       |                                |
| Independent reflections         | 6593 [R(int) = 0.0327]                      |                                |
| Completeness to theta = 67.679° | 96.7 %                                      |                                |
| Absorption correction           | Semi-empirical from equivalents             |                                |
| Max. and min. transmission      | 0.7528 and 0.7079                           |                                |
| Refinement method               | Full-matrix least-squares on F <sup>2</sup> |                                |

|                                   |                                    |
|-----------------------------------|------------------------------------|
| Data / restraints / parameters    | 6593 / 1 / 425                     |
| Goodness-of-fit on F <sup>2</sup> | 1.065                              |
| Final R indices [I>2sigma(I)]     | R1 = 0.0425, wR2 = 0.1073          |
| R indices (all data)              | R1 = 0.0444, wR2 = 0.1089          |
| Absolute structure parameter      | 0.05(7)                            |
| Extinction coefficient            | n/a                                |
| Largest diff. peak and hole       | 0.503 and -0.258 e.Å <sup>-3</sup> |

Table 2. Atomic coordinates ( $\times 10^4$ ) and equivalent isotropic displacement parameters ( $\text{\AA}^2 \times 10^3$ ) for d13160\_sq\_d\_x.  $U(\text{eq})$  is defined as one third of the trace of the orthogonalized  $U^{ij}$  tensor.

|       | x        | y        | z        | $U(\text{eq})$ |
|-------|----------|----------|----------|----------------|
| O(1)  | 7232(3)  | 2290(4)  | 5999(2)  | 93(1)          |
| O(2)  | 9269(3)  | 3352(2)  | 8246(1)  | 55(1)          |
| O(3)  | 10819(2) | 7892(2)  | 8048(1)  | 53(1)          |
| O(4)  | 8325(2)  | 6976(2)  | 6422(1)  | 45(1)          |
| O(5)  | 5819(2)  | 6668(2)  | 7721(1)  | 37(1)          |
| O(6)  | 2933(3)  | 3577(4)  | 5981(2)  | 75(1)          |
| N(1)  | 6455(3)  | 3284(3)  | 6841(1)  | 41(1)          |
| N(2)  | 8901(3)  | 4661(2)  | 7300(1)  | 36(1)          |
| N(3)  | 8810(2)  | 6911(2)  | 8064(1)  | 32(1)          |
| N(4)  | 7496(3)  | 8604(3)  | 7000(1)  | 40(1)          |
| N(5)  | 4875(3)  | 8121(3)  | 6366(1)  | 44(1)          |
| N(6)  | 4387(3)  | 8242(3)  | 7983(1)  | 43(1)          |
| N(7)  | 4258(3)  | 5034(3)  | 6696(1)  | 42(1)          |
| C(1)  | 7435(3)  | 2998(3)  | 6519(2)  | 39(1)          |
| C(2)  | 8835(3)  | 3578(3)  | 6811(2)  | 40(1)          |
| C(3)  | 9176(3)  | 4466(3)  | 7988(2)  | 34(1)          |
| C(4)  | 8908(3)  | 5527(3)  | 9112(1)  | 35(1)          |
| C(5)  | 9463(3)  | 6537(3)  | 9691(2)  | 41(1)          |
| C(6)  | 8747(4)  | 6331(4)  | 10289(2) | 54(1)          |
| C(7)  | 10986(4) | 6427(5)  | 9955(2)  | 63(1)          |
| C(8)  | 9407(3)  | 5725(3)  | 8449(1)  | 32(1)          |
| C(9)  | 9574(3)  | 7874(3)  | 7866(2)  | 39(1)          |
| C(10) | 8832(4)  | 8990(3)  | 7404(2)  | 40(1)          |
| C(11) | 8745(4)  | 10230(3) | 7834(2)  | 48(1)          |
| C(12) | 7344(3)  | 7625(3)  | 6530(1)  | 40(1)          |
| C(13) | 5911(3)  | 7316(3)  | 6130(1)  | 40(1)          |
| C(14) | 5730(4)  | 7674(3)  | 5349(2)  | 47(1)          |
| C(15) | 5068(4)  | 9045(4)  | 5302(2)  | 55(1)          |
| C(16) | 4088(4)  | 8889(4)  | 5764(2)  | 55(1)          |
| C(17) | 4015(3)  | 7502(4)  | 6795(2)  | 47(1)          |
| C(18) | 4830(3)  | 7428(3)  | 7552(1)  | 38(1)          |



|       |         |         |         |        |
|-------|---------|---------|---------|--------|
| C(19) | 4856(3) | 8312(3) | 8755(1) | 36(1)  |
| C(20) | 6319(3) | 8809(3) | 8942(2) | 42(1)  |
| C(21) | 3921(4) | 9309(4) | 8995(2) | 47(1)  |
| C(22) | 4723(4) | 6941(3) | 9061(2) | 47(1)  |
| C(23) | 3311(4) | 6170(4) | 6546(2) | 52(1)  |
| C(24) | 2100(4) | 5952(6) | 6866(2) | 73(1)  |
| C(25) | 3995(3) | 3854(4) | 6397(2) | 50(1)  |
| C(26) | 5085(3) | 2756(4) | 6604(2) | 48(1)  |
| C(27) | 4687(4) | 1763(4) | 7123(2) | 51(1)  |
| C(28) | 4524(3) | 2395(3) | 7796(2) | 41(1)  |
| C(29) | 5625(3) | 2632(3) | 8340(2) | 42(1)  |
| C(30) | 5449(4) | 3208(3) | 8957(2) | 46(1)  |
| C(31) | 4159(4) | 3517(4) | 9024(2) | 48(1)  |
| C(32) | 3055(4) | 3286(4) | 8486(2) | 50(1)  |
| C(33) | 3223(3) | 2734(4) | 7867(2) | 48(1)  |
| O(1W) | 2092(3) | 9725(4) | 7366(3) | 109(2) |

---

Table 3. Bond lengths [ $\text{\AA}$ ] and angles [ $^\circ$ ] for d13160\_sq\_d\_x.

---

|            |          |
|------------|----------|
| O(1)-C(1)  | 1.225(4) |
| O(2)-C(3)  | 1.220(4) |
| O(3)-C(9)  | 1.223(4) |
| O(4)-C(12) | 1.241(4) |
| O(5)-C(18) | 1.237(4) |
| O(6)-C(25) | 1.222(4) |
| N(1)-C(1)  | 1.324(4) |
| N(1)-C(26) | 1.451(4) |
| N(1)-H(1N) | 0.9000   |
| N(2)-C(3)  | 1.336(4) |
| N(2)-C(2)  | 1.443(4) |
| N(2)-H(2N) | 0.9000   |
| N(3)-C(9)  | 1.346(4) |
| N(3)-C(8)  | 1.462(3) |
| N(3)-H(3N) | 0.9000   |
| N(4)-C(12) | 1.334(4) |
| N(4)-C(10) | 1.451(4) |
| N(4)-H(4N) | 0.9000   |
| N(5)-C(13) | 1.476(4) |
| N(5)-C(17) | 1.479(5) |
| N(5)-C(16) | 1.483(4) |
| N(6)-C(18) | 1.327(4) |
| N(6)-C(19) | 1.491(3) |
| N(6)-H(6N) | 0.9000   |
| N(7)-C(25) | 1.318(5) |
| N(7)-C(23) | 1.470(5) |
| N(7)-H(7N) | 0.9000   |
| C(1)-C(2)  | 1.512(4) |
| C(2)-H(2A) | 0.9900   |
| C(2)-H(2B) | 0.9900   |
| C(3)-C(8)  | 1.540(4) |
| C(4)-C(8)  | 1.520(4) |
| C(4)-C(5)  | 1.533(4) |
| C(4)-H(4A) | 0.9900   |

|              |          |
|--------------|----------|
| C(4)-H(4B)   | 0.9900   |
| C(5)-C(7)    | 1.507(5) |
| C(5)-C(6)    | 1.534(5) |
| C(5)-H(5A)   | 1.0000   |
| C(6)-H(6A)   | 0.9800   |
| C(6)-H(6B)   | 0.9800   |
| C(6)-H(6C)   | 0.9800   |
| C(7)-H(7A)   | 0.9800   |
| C(7)-H(7B)   | 0.9800   |
| C(7)-H(7C)   | 0.9800   |
| C(8)-H(8A)   | 1.0000   |
| C(9)-C(10)   | 1.523(4) |
| C(10)-C(11)  | 1.517(5) |
| C(10)-H(10A) | 1.0000   |
| C(11)-H(11A) | 0.9800   |
| C(11)-H(11B) | 0.9800   |
| C(11)-H(11C) | 0.9800   |
| C(12)-C(13)  | 1.511(5) |
| C(13)-C(14)  | 1.554(4) |
| C(13)-H(13A) | 1.0000   |
| C(14)-C(15)  | 1.519(5) |
| C(14)-H(14A) | 0.9900   |
| C(14)-H(14B) | 0.9900   |
| C(15)-C(16)  | 1.499(6) |
| C(15)-H(15A) | 0.9900   |
| C(15)-H(15B) | 0.9900   |
| C(16)-H(16A) | 0.9900   |
| C(16)-H(16B) | 0.9900   |
| C(17)-C(18)  | 1.534(4) |
| C(17)-C(23)  | 1.536(5) |
| C(17)-H(17A) | 1.0000   |
| C(19)-C(22)  | 1.517(5) |
| C(19)-C(20)  | 1.519(5) |
| C(19)-C(21)  | 1.521(5) |
| C(20)-H(20A) | 0.9800   |
| C(20)-H(20B) | 0.9800   |

|                  |          |
|------------------|----------|
| C(20)-H(20C)     | 0.9800   |
| C(21)-H(21A)     | 0.9800   |
| C(21)-H(21B)     | 0.9800   |
| C(21)-H(21C)     | 0.9800   |
| C(22)-H(22A)     | 0.9800   |
| C(22)-H(22B)     | 0.9800   |
| C(22)-H(22C)     | 0.9800   |
| C(23)-C(24)      | 1.515(6) |
| C(23)-H(23A)     | 1.0000   |
| C(24)-H(24A)     | 0.9800   |
| C(24)-H(24B)     | 0.9800   |
| C(24)-H(24C)     | 0.9800   |
| C(25)-C(26)      | 1.540(6) |
| C(26)-C(27)      | 1.545(5) |
| C(26)-H(26A)     | 1.0000   |
| C(27)-C(28)      | 1.515(4) |
| C(27)-H(27A)     | 0.9900   |
| C(27)-H(27B)     | 0.9900   |
| C(28)-C(29)      | 1.375(5) |
| C(28)-C(33)      | 1.393(5) |
| C(29)-C(30)      | 1.397(5) |
| C(29)-H(29A)     | 0.9500   |
| C(30)-C(31)      | 1.372(5) |
| C(30)-H(30A)     | 0.9500   |
| C(31)-C(32)      | 1.370(5) |
| C(31)-H(31A)     | 0.9500   |
| C(32)-C(33)      | 1.386(5) |
| C(32)-H(32A)     | 0.9500   |
| C(33)-H(33A)     | 0.9500   |
| O(1W)-H(1WA)     | 0.8421   |
| O(1W)-H(1WB)     | 0.8405   |
|                  |          |
| C(1)-N(1)-C(26)  | 121.8(2) |
| C(1)-N(1)-H(1N)  | 107.2    |
| C(26)-N(1)-H(1N) | 124.3    |
| C(3)-N(2)-C(2)   | 122.6(3) |

|                  |          |
|------------------|----------|
| C(3)-N(2)-H(2N)  | 119.9    |
| C(2)-N(2)-H(2N)  | 117.3    |
| C(9)-N(3)-C(8)   | 122.5(2) |
| C(9)-N(3)-H(3N)  | 121.4    |
| C(8)-N(3)-H(3N)  | 115.8    |
| C(12)-N(4)-C(10) | 121.4(3) |
| C(12)-N(4)-H(4N) | 121.5    |
| C(10)-N(4)-H(4N) | 117.1    |
| C(13)-N(5)-C(17) | 120.2(3) |
| C(13)-N(5)-C(16) | 108.4(2) |
| C(17)-N(5)-C(16) | 113.6(3) |
| C(18)-N(6)-C(19) | 127.6(3) |
| C(18)-N(6)-H(6N) | 108.7    |
| C(19)-N(6)-H(6N) | 116.2    |
| C(25)-N(7)-C(23) | 123.2(3) |
| C(25)-N(7)-H(7N) | 120.5    |
| C(23)-N(7)-H(7N) | 115.3    |
| O(1)-C(1)-N(1)   | 122.0(3) |
| O(1)-C(1)-C(2)   | 120.1(3) |
| N(1)-C(1)-C(2)   | 117.9(2) |
| N(2)-C(2)-C(1)   | 116.0(3) |
| N(2)-C(2)-H(2A)  | 108.3    |
| C(1)-C(2)-H(2A)  | 108.3    |
| N(2)-C(2)-H(2B)  | 108.3    |
| C(1)-C(2)-H(2B)  | 108.3    |
| H(2A)-C(2)-H(2B) | 107.4    |
| O(2)-C(3)-N(2)   | 122.4(3) |
| O(2)-C(3)-C(8)   | 120.8(3) |
| N(2)-C(3)-C(8)   | 116.8(2) |
| C(8)-C(4)-C(5)   | 114.9(3) |
| C(8)-C(4)-H(4A)  | 108.5    |
| C(5)-C(4)-H(4A)  | 108.5    |
| C(8)-C(4)-H(4B)  | 108.5    |
| C(5)-C(4)-H(4B)  | 108.5    |
| H(4A)-C(4)-H(4B) | 107.5    |
| C(7)-C(5)-C(4)   | 112.2(3) |

|                     |          |
|---------------------|----------|
| C(7)-C(5)-C(6)      | 110.3(3) |
| C(4)-C(5)-C(6)      | 109.3(3) |
| C(7)-C(5)-H(5A)     | 108.3    |
| C(4)-C(5)-H(5A)     | 108.3    |
| C(6)-C(5)-H(5A)     | 108.3    |
| C(5)-C(6)-H(6A)     | 109.5    |
| C(5)-C(6)-H(6B)     | 109.5    |
| H(6A)-C(6)-H(6B)    | 109.5    |
| C(5)-C(6)-H(6C)     | 109.5    |
| H(6A)-C(6)-H(6C)    | 109.5    |
| H(6B)-C(6)-H(6C)    | 109.5    |
| C(5)-C(7)-H(7A)     | 109.5    |
| C(5)-C(7)-H(7B)     | 109.5    |
| H(7A)-C(7)-H(7B)    | 109.5    |
| C(5)-C(7)-H(7C)     | 109.5    |
| H(7A)-C(7)-H(7C)    | 109.5    |
| H(7B)-C(7)-H(7C)    | 109.5    |
| N(3)-C(8)-C(4)      | 112.1(2) |
| N(3)-C(8)-C(3)      | 111.5(2) |
| C(4)-C(8)-C(3)      | 111.6(2) |
| N(3)-C(8)-H(8A)     | 107.1    |
| C(4)-C(8)-H(8A)     | 107.1    |
| C(3)-C(8)-H(8A)     | 107.1    |
| O(3)-C(9)-N(3)      | 122.8(3) |
| O(3)-C(9)-C(10)     | 119.7(3) |
| N(3)-C(9)-C(10)     | 117.6(3) |
| N(4)-C(10)-C(11)    | 111.0(3) |
| N(4)-C(10)-C(9)     | 113.6(3) |
| C(11)-C(10)-C(9)    | 110.3(3) |
| N(4)-C(10)-H(10A)   | 107.2    |
| C(11)-C(10)-H(10A)  | 107.2    |
| C(9)-C(10)-H(10A)   | 107.2    |
| C(10)-C(11)-H(11A)  | 109.5    |
| C(10)-C(11)-H(11B)  | 109.5    |
| H(11A)-C(11)-H(11B) | 109.5    |
| C(10)-C(11)-H(11C)  | 109.5    |

|                     |          |
|---------------------|----------|
| H(11A)-C(11)-H(11C) | 109.5    |
| H(11B)-C(11)-H(11C) | 109.5    |
| O(4)-C(12)-N(4)     | 122.4(3) |
| O(4)-C(12)-C(13)    | 120.5(3) |
| N(4)-C(12)-C(13)    | 117.1(3) |
| N(5)-C(13)-C(12)    | 112.6(2) |
| N(5)-C(13)-C(14)    | 105.0(2) |
| C(12)-C(13)-C(14)   | 110.6(3) |
| N(5)-C(13)-H(13A)   | 109.5    |
| C(12)-C(13)-H(13A)  | 109.5    |
| C(14)-C(13)-H(13A)  | 109.5    |
| C(15)-C(14)-C(13)   | 102.5(3) |
| C(15)-C(14)-H(14A)  | 111.3    |
| C(13)-C(14)-H(14A)  | 111.3    |
| C(15)-C(14)-H(14B)  | 111.3    |
| C(13)-C(14)-H(14B)  | 111.3    |
| H(14A)-C(14)-H(14B) | 109.2    |
| C(16)-C(15)-C(14)   | 102.2(3) |
| C(16)-C(15)-H(15A)  | 111.3    |
| C(14)-C(15)-H(15A)  | 111.3    |
| C(16)-C(15)-H(15B)  | 111.3    |
| C(14)-C(15)-H(15B)  | 111.3    |
| H(15A)-C(15)-H(15B) | 109.2    |
| N(5)-C(16)-C(15)    | 103.7(3) |
| N(5)-C(16)-H(16A)   | 111.0    |
| C(15)-C(16)-H(16A)  | 111.0    |
| N(5)-C(16)-H(16B)   | 111.0    |
| C(15)-C(16)-H(16B)  | 111.0    |
| H(16A)-C(16)-H(16B) | 109.0    |
| N(5)-C(17)-C(18)    | 109.0(3) |
| N(5)-C(17)-C(23)    | 117.9(3) |
| C(18)-C(17)-C(23)   | 112.0(3) |
| N(5)-C(17)-H(17A)   | 105.7    |
| C(18)-C(17)-H(17A)  | 105.7    |
| C(23)-C(17)-H(17A)  | 105.7    |
| O(5)-C(18)-N(6)     | 124.9(3) |

|                     |          |
|---------------------|----------|
| O(5)-C(18)-C(17)    | 120.7(3) |
| N(6)-C(18)-C(17)    | 114.4(3) |
| N(6)-C(19)-C(22)    | 109.2(2) |
| N(6)-C(19)-C(20)    | 109.0(2) |
| C(22)-C(19)-C(20)   | 111.7(3) |
| N(6)-C(19)-C(21)    | 106.0(2) |
| C(22)-C(19)-C(21)   | 110.5(3) |
| C(20)-C(19)-C(21)   | 110.3(3) |
| C(19)-C(20)-H(20A)  | 109.5    |
| C(19)-C(20)-H(20B)  | 109.5    |
| H(20A)-C(20)-H(20B) | 109.5    |
| C(19)-C(20)-H(20C)  | 109.5    |
| H(20A)-C(20)-H(20C) | 109.5    |
| H(20B)-C(20)-H(20C) | 109.5    |
| C(19)-C(21)-H(21A)  | 109.5    |
| C(19)-C(21)-H(21B)  | 109.5    |
| H(21A)-C(21)-H(21B) | 109.5    |
| C(19)-C(21)-H(21C)  | 109.5    |
| H(21A)-C(21)-H(21C) | 109.5    |
| H(21B)-C(21)-H(21C) | 109.5    |
| C(19)-C(22)-H(22A)  | 109.5    |
| C(19)-C(22)-H(22B)  | 109.5    |
| H(22A)-C(22)-H(22B) | 109.5    |
| C(19)-C(22)-H(22C)  | 109.5    |
| H(22A)-C(22)-H(22C) | 109.5    |
| H(22B)-C(22)-H(22C) | 109.5    |
| N(7)-C(23)-C(24)    | 110.7(4) |
| N(7)-C(23)-C(17)    | 112.0(3) |
| C(24)-C(23)-C(17)   | 110.4(3) |
| N(7)-C(23)-H(23A)   | 107.9    |
| C(24)-C(23)-H(23A)  | 107.9    |
| C(17)-C(23)-H(23A)  | 107.9    |
| C(23)-C(24)-H(24A)  | 109.5    |
| C(23)-C(24)-H(24B)  | 109.5    |
| H(24A)-C(24)-H(24B) | 109.5    |
| C(23)-C(24)-H(24C)  | 109.5    |



|                     |          |
|---------------------|----------|
| H(24A)-C(24)-H(24C) | 109.5    |
| H(24B)-C(24)-H(24C) | 109.5    |
| O(6)-C(25)-N(7)     | 124.0(4) |
| O(6)-C(25)-C(26)    | 118.6(3) |
| N(7)-C(25)-C(26)    | 117.4(3) |
| N(1)-C(26)-C(25)    | 113.3(3) |
| N(1)-C(26)-C(27)    | 113.1(3) |
| C(25)-C(26)-C(27)   | 110.8(3) |
| N(1)-C(26)-H(26A)   | 106.3    |
| C(25)-C(26)-H(26A)  | 106.3    |
| C(27)-C(26)-H(26A)  | 106.3    |
| C(28)-C(27)-C(26)   | 114.3(3) |
| C(28)-C(27)-H(27A)  | 108.7    |
| C(26)-C(27)-H(27A)  | 108.7    |
| C(28)-C(27)-H(27B)  | 108.7    |
| C(26)-C(27)-H(27B)  | 108.7    |
| H(27A)-C(27)-H(27B) | 107.6    |
| C(29)-C(28)-C(33)   | 119.3(3) |
| C(29)-C(28)-C(27)   | 121.7(3) |
| C(33)-C(28)-C(27)   | 118.9(3) |
| C(28)-C(29)-C(30)   | 120.7(3) |
| C(28)-C(29)-H(29A)  | 119.7    |
| C(30)-C(29)-H(29A)  | 119.7    |
| C(31)-C(30)-C(29)   | 119.4(3) |
| C(31)-C(30)-H(30A)  | 120.3    |
| C(29)-C(30)-H(30A)  | 120.3    |
| C(32)-C(31)-C(30)   | 120.4(3) |
| C(32)-C(31)-H(31A)  | 119.8    |
| C(30)-C(31)-H(31A)  | 119.8    |
| C(31)-C(32)-C(33)   | 120.6(3) |
| C(31)-C(32)-H(32A)  | 119.7    |
| C(33)-C(32)-H(32A)  | 119.7    |
| C(32)-C(33)-C(28)   | 119.6(3) |
| C(32)-C(33)-H(33A)  | 120.2    |
| C(28)-C(33)-H(33A)  | 120.2    |
| H(1WA)-O(1W)-H(1WB) | 122.8    |

---

Symmetry transformations used to generate equivalent atoms:

Table 4. Anisotropic displacement parameters ( $\text{\AA}^2 \times 10^3$ ) for d13160\_sq\_d\_x. The anisotropic displacement factor exponent takes the form:  $-2\pi^2 [ h^2 a^{*2} U^{11} + \dots + 2 h k a^* b^* U^{12} ]$

|       | U <sup>11</sup> | U <sup>22</sup> | U <sup>33</sup> | U <sup>23</sup> | U <sup>13</sup> | U <sup>12</sup> |
|-------|-----------------|-----------------|-----------------|-----------------|-----------------|-----------------|
| O(1)  | 46(1)           | 160(4)          | 74(2)           | -74(2)          | 13(1)           | -10(2)          |
| O(2)  | 88(2)           | 30(1)           | 41(1)           | 1(1)            | 4(1)            | 4(1)            |
| O(3)  | 48(1)           | 39(1)           | 68(2)           | 12(1)           | 5(1)            | -11(1)          |
| O(4)  | 62(1)           | 41(1)           | 33(1)           | 2(1)            | 15(1)           | 2(1)            |
| O(5)  | 42(1)           | 39(1)           | 28(1)           | -2(1)           | 3(1)            | 7(1)            |
| O(6)  | 51(2)           | 105(2)          | 65(2)           | -46(2)          | 3(1)            | -14(2)          |
| N(1)  | 47(1)           | 45(2)           | 34(1)           | -13(1)          | 16(1)           | -17(1)          |
| N(2)  | 45(1)           | 27(1)           | 36(1)           | -1(1)           | 12(1)           | -1(1)           |
| N(3)  | 38(1)           | 25(1)           | 31(1)           | 1(1)            | 7(1)            | 0(1)            |
| N(4)  | 56(2)           | 32(1)           | 30(1)           | 1(1)            | 4(1)            | 1(1)            |
| N(5)  | 60(2)           | 44(2)           | 23(1)           | 0(1)            | -1(1)           | 11(1)           |
| N(6)  | 51(2)           | 45(2)           | 30(1)           | -1(1)           | 3(1)            | 14(1)           |
| N(7)  | 46(2)           | 54(2)           | 25(1)           | -2(1)           | 2(1)            | -10(1)          |
| C(1)  | 45(2)           | 41(2)           | 31(1)           | -6(1)           | 8(1)            | 1(1)            |
| C(2)  | 45(2)           | 38(2)           | 40(2)           | -5(1)           | 15(1)           | 0(1)            |
| C(3)  | 33(1)           | 27(2)           | 39(2)           | -1(1)           | 6(1)            | 2(1)            |
| C(4)  | 41(2)           | 31(2)           | 30(1)           | 2(1)            | 3(1)            | -2(1)           |
| C(5)  | 45(2)           | 38(2)           | 34(2)           | -3(1)           | 0(1)            | 3(1)            |
| C(6)  | 65(2)           | 63(2)           | 34(2)           | -3(2)           | 9(2)            | 2(2)            |
| C(7)  | 45(2)           | 80(3)           | 56(2)           | -19(2)          | -8(2)           | -4(2)           |
| C(8)  | 33(1)           | 28(1)           | 33(1)           | 2(1)            | 0(1)            | 1(1)            |
| C(9)  | 51(2)           | 29(2)           | 34(1)           | -5(1)           | 7(1)            | -6(1)           |
| C(10) | 58(2)           | 30(2)           | 32(1)           | 2(1)            | 9(1)            | -5(1)           |
| C(11) | 63(2)           | 29(2)           | 50(2)           | -4(1)           | 6(2)            | -4(2)           |
| C(12) | 62(2)           | 32(2)           | 24(1)           | 5(1)            | 10(1)           | -1(2)           |
| C(13) | 62(2)           | 30(2)           | 24(1)           | 0(1)            | 5(1)            | 1(1)            |
| C(14) | 75(2)           | 40(2)           | 23(1)           | 0(1)            | 3(1)            | -3(2)           |
| C(15) | 88(3)           | 41(2)           | 27(2)           | 4(1)            | -6(2)           | -4(2)           |
| C(16) | 80(2)           | 45(2)           | 28(2)           | -2(1)           | -8(2)           | 17(2)           |
| C(17) | 47(2)           | 57(2)           | 32(2)           | -3(2)           | -2(1)           | 10(2)           |
| C(18) | 44(2)           | 43(2)           | 24(1)           | -3(1)           | 2(1)            | 2(1)            |

|       |       |        |        |        |       |        |
|-------|-------|--------|--------|--------|-------|--------|
| C(19) | 49(2) | 34(2)  | 24(1)  | 0(1)   | 3(1)  | 9(1)   |
| C(20) | 52(2) | 42(2)  | 31(1)  | -5(1)  | 9(1)  | 2(1)   |
| C(21) | 56(2) | 50(2)  | 34(2)  | -4(1)  | 9(1)  | 8(2)   |
| C(22) | 61(2) | 40(2)  | 40(2)  | 1(1)   | 11(2) | -2(2)  |
| C(23) | 48(2) | 73(2)  | 30(2)  | -9(2)  | 0(1)  | 1(2)   |
| C(24) | 54(2) | 109(4) | 57(2)  | -19(2) | 15(2) | -11(2) |
| C(25) | 47(2) | 69(2)  | 38(2)  | -18(2) | 19(1) | -20(2) |
| C(26) | 49(2) | 57(2)  | 42(2)  | -19(2) | 18(1) | -24(2) |
| C(27) | 62(2) | 49(2)  | 49(2)  | -20(2) | 28(2) | -23(2) |
| C(28) | 51(2) | 38(2)  | 40(2)  | -4(1)  | 21(1) | -10(1) |
| C(29) | 44(2) | 36(2)  | 48(2)  | 4(1)   | 17(1) | -1(1)  |
| C(30) | 56(2) | 43(2)  | 37(2)  | 4(1)   | 8(1)  | -1(2)  |
| C(31) | 73(2) | 43(2)  | 33(2)  | 6(1)   | 21(2) | 6(2)   |
| C(32) | 51(2) | 57(2)  | 50(2)  | 11(2)  | 25(2) | 8(2)   |
| C(33) | 47(2) | 59(2)  | 42(2)  | 3(2)   | 17(1) | -7(2)  |
| O(1W) | 50(2) | 99(3)  | 176(4) | 73(3)  | 24(2) | 4(2)   |

---

Table 5. Hydrogen coordinates ( $\times 10^4$ ) and isotropic displacement parameters ( $\text{\AA}^2 \times 10^{-3}$ ) for d13160\_sq\_d\_x.

|        | x     | y     | z     | U(eq) |
|--------|-------|-------|-------|-------|
| H(1N)  | 6858  | 3446  | 7289  | 61    |
| H(2N)  | 8679  | 5483  | 7125  | 53    |
| H(3N)  | 7894  | 6921  | 7928  | 48    |
| H(4N)  | 6772  | 9035  | 7092  | 60    |
| H(6N)  | 3499  | 8416  | 7806  | 65    |
| H(7N)  | 4960  | 5137  | 7066  | 64    |
| H(2A)  | 9437  | 2849  | 7042  | 48    |
| H(2B)  | 9206  | 3900  | 6418  | 48    |
| H(4A)  | 9164  | 4616  | 9292  | 42    |
| H(4B)  | 7900  | 5579  | 8996  | 42    |
| H(5A)  | 9247  | 7458  | 9500  | 49    |
| H(6A)  | 9103  | 6975  | 10661 | 81    |
| H(6B)  | 8917  | 5420  | 10471 | 81    |
| H(6C)  | 7764  | 6468  | 10118 | 81    |
| H(7A)  | 11297 | 7091  | 10322 | 95    |
| H(7B)  | 11433 | 6589  | 9572  | 95    |
| H(7C)  | 11218 | 5528  | 10143 | 95    |
| H(8A)  | 10414 | 5875  | 8591  | 39    |
| H(10A) | 9397  | 9226  | 7066  | 48    |
| H(11A) | 8275  | 10942 | 7531  | 73    |
| H(11B) | 9667  | 10528 | 8060  | 73    |
| H(11C) | 8239  | 10021 | 8189  | 73    |
| H(13A) | 5717  | 6344  | 6177  | 48    |
| H(14A) | 6619  | 7711  | 5217  | 57    |
| H(14B) | 5133  | 7020  | 5047  | 57    |
| H(15A) | 5748  | 9752  | 5476  | 66    |
| H(15B) | 4585  | 9258  | 4819  | 66    |
| H(16A) | 3811  | 9771  | 5913  | 66    |
| H(16B) | 3264  | 8392  | 5525  | 66    |
| H(17A) | 3262  | 8154  | 6793  | 57    |

|        |      |       |      |     |
|--------|------|-------|------|-----|
| H(20A) | 6367 | 9696  | 8737 | 63  |
| H(20B) | 6902 | 8186  | 8759 | 63  |
| H(20C) | 6632 | 8867  | 9448 | 63  |
| H(21A) | 2980 | 8980  | 8869 | 71  |
| H(21B) | 3975 | 10174 | 8769 | 71  |
| H(21C) | 4203 | 9417  | 9500 | 71  |
| H(22A) | 3769 | 6651  | 8930 | 70  |
| H(22B) | 5019 | 6985  | 9569 | 70  |
| H(22C) | 5294 | 6300  | 8882 | 70  |
| H(23A) | 2963 | 6225  | 6030 | 62  |
| H(24A) | 1670 | 5092  | 6709 | 110 |
| H(24B) | 1439 | 6675  | 6723 | 110 |
| H(24C) | 2408 | 5946  | 7374 | 110 |
| H(26A) | 5081 | 2235  | 6172 | 58  |
| H(27A) | 3818 | 1325  | 6896 | 61  |
| H(27B) | 5393 | 1058  | 7234 | 61  |
| H(29A) | 6515 | 2400  | 8294 | 50  |
| H(30A) | 6215 | 3386  | 9327 | 55  |
| H(31A) | 4031 | 3893  | 9446 | 58  |
| H(32A) | 2167 | 3506  | 8537 | 61  |
| H(33A) | 2454 | 2587  | 7494 | 58  |
| H(1WA) | 1702 | 9152  | 7566 | 163 |
| H(1WB) | 1670 | 10200 | 7035 | 163 |

---

Table 6. Hydrogen bonds for d13160\_sq\_d\_x [ $\text{\AA}$  and  $^\circ$ ].

| D-H...A               | d(D-H) | d(H...A) | d(D...A) | $\angle$ (DHA) |
|-----------------------|--------|----------|----------|----------------|
| N(1)-H(1N)...N(2)     | 0.90   | 2.39     | 2.788(3) | 107.1          |
| N(2)-H(2N)...O(4)     | 0.90   | 2.01     | 2.870(3) | 158.6          |
| N(2)-H(2N)...N(3)     | 0.90   | 2.32     | 2.723(3) | 106.9          |
| N(3)-H(3N)...O(5)     | 0.90   | 2.05     | 2.945(3) | 170.4          |
| N(3)-H(3N)...N(4)     | 0.90   | 2.45     | 2.785(3) | 102.2          |
| N(4)-H(4N)...N(5)     | 0.90   | 2.30     | 2.694(4) | 106.3          |
| N(6)-H(6N)...O(1W)    | 0.90   | 1.98     | 2.782(4) | 147.9          |
| N(7)-H(7N)...O(5)     | 0.90   | 2.06     | 2.790(3) | 137.3          |
| O(1W)-H(1WA)...O(3)#1 | 0.84   | 1.92     | 2.760(4) | 178.0          |

Symmetry transformations used to generate equivalent atoms:

#1 x-1,y,z

**(28)**

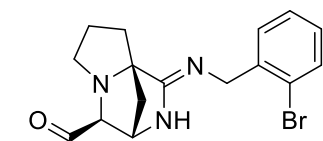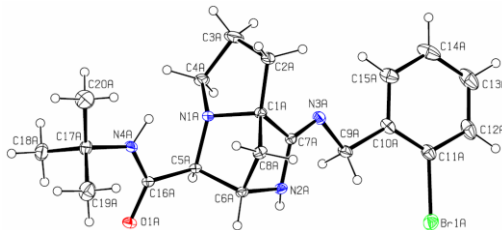

Table 1. Crystal data and structure refinement for d14137.

|                                   |                                                     |                 |
|-----------------------------------|-----------------------------------------------------|-----------------|
| Identification code               | d14137                                              |                 |
| Empirical formula                 | C <sub>20</sub> H <sub>27</sub> Br N <sub>4</sub> O |                 |
| Formula weight                    | 419.36                                              |                 |
| Temperature                       | 147(2) K                                            |                 |
| Wavelength                        | 1.54178 Å                                           |                 |
| Crystal system                    | Monoclinic                                          |                 |
| Space group                       | P2 <sub>1</sub>                                     |                 |
| Unit cell dimensions              | a = 8.9698(4) Å                                     | α = 90°.        |
|                                   | b = 18.4284(8) Å                                    | β = 98.310(2)°. |
|                                   | c = 12.3981(5) Å                                    | γ = 90°.        |
| Volume                            | 2027.88(15) Å <sup>3</sup>                          |                 |
| Z                                 | 4                                                   |                 |
| Density (calculated)              | 1.374 Mg/m <sup>3</sup>                             |                 |
| Absorption coefficient            | 2.882 mm <sup>-1</sup>                              |                 |
| F(000)                            | 872                                                 |                 |
| Crystal size                      | 0.220 x 0.200 x 0.180 mm <sup>3</sup>               |                 |
| Theta range for data collection   | 3.603 to 67.191°.                                   |                 |
| Index ranges                      | -10 ≤ h ≤ 10, -21 ≤ k ≤ 21, -14 ≤ l ≤ 14            |                 |
| Reflections collected             | 39585                                               |                 |
| Independent reflections           | 7137 [R(int) = 0.0326]                              |                 |
| Completeness to theta = 67.679°   | 98.0 %                                              |                 |
| Absorption correction             | Semi-empirical from equivalents                     |                 |
| Max. and min. transmission        | 0.7529 and 0.6391                                   |                 |
| Refinement method                 | Full-matrix least-squares on F <sup>2</sup>         |                 |
| Data / restraints / parameters    | 7137 / 1 / 491                                      |                 |
| Goodness-of-fit on F <sup>2</sup> | 0.977                                               |                 |
| Final R indices [I > 2σ(I)]       | R1 = 0.0226, wR2 = 0.0588                           |                 |
| R indices (all data)              | R1 = 0.0228, wR2 = 0.0590                           |                 |



|                              |                                    |
|------------------------------|------------------------------------|
| Absolute structure parameter | 0.016(3)                           |
| Extinction coefficient       | n/a                                |
| Largest diff. peak and hole  | 0.495 and -0.868 e.Å <sup>-3</sup> |

Table 2. Atomic coordinates ( $\times 10^4$ ) and equivalent isotropic displacement parameters ( $\text{\AA}^2 \times 10^3$ ) for d14137.  $U(\text{eq})$  is defined as one third of the trace of the orthogonalized  $U^{ij}$  tensor.

|        | x        | y        | z        | $U(\text{eq})$ |
|--------|----------|----------|----------|----------------|
| Br(1A) | 7210(1)  | 2823(1)  | 11118(1) | 32(1)          |
| O(1A)  | 110(2)   | -517(1)  | 12149(2) | 26(1)          |
| N(1A)  | 641(2)   | 300(1)   | 9564(2)  | 19(1)          |
| N(2A)  | 2435(3)  | 1302(1)  | 10923(2) | 19(1)          |
| N(3A)  | 3372(3)  | 1514(1)  | 9224(2)  | 22(1)          |
| N(4A)  | -1407(3) | -421(1)  | 10510(2) | 24(1)          |
| C(1A)  | 746(3)   | 1093(1)  | 9357(2)  | 18(1)          |
| C(2A)  | 307(3)   | 1137(2)  | 8140(2)  | 25(1)          |
| C(3A)  | 911(5)   | 421(2)   | 7734(2)  | 42(1)          |
| C(4A)  | 1401(4)  | -57(2)   | 8750(2)  | 28(1)          |
| C(5A)  | 997(3)   | 183(1)   | 10742(2) | 18(1)          |
| C(6A)  | 1023(3)  | 984(1)   | 11150(2) | 19(1)          |
| C(7A)  | 2358(3)  | 1332(1)  | 9799(2)  | 18(1)          |
| C(8A)  | -90(3)   | 1367(2)  | 10267(2) | 22(1)          |
| C(9A)  | 4793(3)  | 1743(2)  | 9850(2)  | 26(1)          |
| C(10A) | 5751(3)  | 2154(2)  | 9149(2)  | 25(1)          |
| C(11A) | 6845(3)  | 2654(2)  | 9587(2)  | 28(1)          |
| C(12A) | 7710(3)  | 3044(2)  | 8948(3)  | 39(1)          |
| C(13A) | 7495(4)  | 2940(2)  | 7839(3)  | 50(1)          |
| C(14A) | 6423(4)  | 2446(2)  | 7380(3)  | 47(1)          |
| C(15A) | 5569(4)  | 2062(2)  | 8032(3)  | 34(1)          |
| C(16A) | -154(3)  | -292(2)  | 11198(2) | 20(1)          |
| C(17A) | -2719(3) | -870(2)  | 10695(2) | 28(1)          |
| C(18A) | -2203(4) | -1654(2) | 10882(3) | 38(1)          |
| C(19A) | -3386(4) | -588(2)  | 11678(3) | 40(1)          |
| C(20A) | -3855(4) | -805(3)  | 9670(3)  | 54(1)          |
| Br(1B) | -2337(1) | -2261(1) | 3727(1)  | 27(1)          |
| O(1B)  | 4938(2)  | 1038(1)  | 2602(1)  | 24(1)          |
| N(1B)  | 4752(2)  | -116(1)  | 4966(2)  | 17(1)          |
| N(2B)  | 1618(2)  | -5(1)    | 4250(2)  | 17(1)          |
| N(3B)  | 1652(2)  | -982(1)  | 5552(2)  | 19(1)          |

|        |          |          |         |       |
|--------|----------|----------|---------|-------|
| N(4B)  | 6486(2)  | 893(1)   | 4213(2) | 20(1) |
| C(1B)  | 3581(3)  | -7(1)    | 5683(2) | 16(1) |
| C(2B)  | 4347(3)  | -306(2)  | 6761(2) | 22(1) |
| C(3B)  | 5340(3)  | -930(2)  | 6399(2) | 29(1) |
| C(4B)  | 5298(3)  | -856(2)  | 5155(2) | 25(1) |
| C(5B)  | 4189(3)  | 195(1)   | 3896(2) | 17(1) |
| C(6B)  | 2720(3)  | 569(1)   | 4156(2) | 16(1) |
| C(7B)  | 2156(3)  | -407(1)  | 5170(2) | 17(1) |
| C(8B)  | 3147(3)  | 774(1)   | 5372(2) | 17(1) |
| C(9B)  | 302(3)   | -1300(2) | 4935(2) | 22(1) |
| C(10B) | -613(3)  | -1706(1) | 5674(2) | 18(1) |
| C(11B) | -1821(3) | -2146(2) | 5261(2) | 18(1) |
| C(12B) | -2691(3) | -2508(2) | 5927(2) | 23(1) |
| C(13B) | -2346(3) | -2442(2) | 7045(2) | 25(1) |
| C(14B) | -1140(3) | -2010(2) | 7483(2) | 24(1) |
| C(15B) | -291(3)  | -1647(2) | 6803(2) | 21(1) |
| C(16B) | 5264(3)  | 751(2)   | 3506(2) | 18(1) |
| C(17B) | 7655(3)  | 1442(2)  | 4107(2) | 21(1) |
| C(18B) | 8442(3)  | 1262(2)  | 3129(2) | 25(1) |
| C(19B) | 6930(3)  | 2195(2)  | 3987(2) | 25(1) |
| C(20B) | 8775(3)  | 1397(2)  | 5150(3) | 30(1) |

---

Table 3. Bond lengths [ $\text{\AA}$ ] and angles [ $^\circ$ ] for d14137.

---

|               |          |
|---------------|----------|
| Br(1A)-C(11A) | 1.904(3) |
| O(1A)-C(16A)  | 1.240(3) |
| N(1A)-C(4A)   | 1.454(3) |
| N(1A)-C(5A)   | 1.465(3) |
| N(1A)-C(1A)   | 1.490(3) |
| N(2A)-C(7A)   | 1.386(3) |
| N(2A)-C(6A)   | 1.460(3) |
| N(2A)-H(2NA)  | 0.76(4)  |
| N(3A)-C(7A)   | 1.279(4) |
| N(3A)-C(9A)   | 1.456(4) |
| N(4A)-C(16A)  | 1.331(4) |
| N(4A)-C(17A)  | 1.483(4) |
| N(4A)-H(4NA)  | 0.89(4)  |
| C(1A)-C(2A)   | 1.505(4) |
| C(1A)-C(8A)   | 1.529(4) |
| C(1A)-C(7A)   | 1.535(4) |
| C(2A)-C(3A)   | 1.539(4) |
| C(2A)-H(2AA)  | 0.9900   |
| C(2A)-H(2AB)  | 0.9900   |
| C(3A)-C(4A)   | 1.548(4) |
| C(3A)-H(3AA)  | 0.9900   |
| C(3A)-H(3AB)  | 0.9900   |
| C(4A)-H(4AA)  | 0.9900   |
| C(4A)-H(4AB)  | 0.9900   |
| C(5A)-C(16A)  | 1.524(4) |
| C(5A)-C(6A)   | 1.558(3) |
| C(5A)-H(5AA)  | 1.0000   |
| C(6A)-C(8A)   | 1.542(4) |
| C(6A)-H(6AA)  | 1.0000   |
| C(8A)-H(8AA)  | 0.9900   |
| C(8A)-H(8AB)  | 0.9900   |
| C(9A)-C(10A)  | 1.512(4) |
| C(9A)-H(9AA)  | 0.9900   |
| C(9A)-H(9AB)  | 0.9900   |

|               |          |
|---------------|----------|
| C(10A)-C(15A) | 1.381(4) |
| C(10A)-C(11A) | 1.397(4) |
| C(11A)-C(12A) | 1.387(4) |
| C(12A)-C(13A) | 1.374(5) |
| C(12A)-H(12A) | 0.9500   |
| C(13A)-C(14A) | 1.386(6) |
| C(13A)-H(13A) | 0.9500   |
| C(14A)-C(15A) | 1.385(5) |
| C(14A)-H(14A) | 0.9500   |
| C(15A)-H(15A) | 0.9500   |
| C(17A)-C(20A) | 1.514(5) |
| C(17A)-C(18A) | 1.524(5) |
| C(17A)-C(19A) | 1.525(4) |
| C(18A)-H(18A) | 0.9800   |
| C(18A)-H(18B) | 0.9800   |
| C(18A)-H(18C) | 0.9800   |
| C(19A)-H(19A) | 0.9800   |
| C(19A)-H(19B) | 0.9800   |
| C(19A)-H(19C) | 0.9800   |
| C(20A)-H(20A) | 0.9800   |
| C(20A)-H(20B) | 0.9800   |
| C(20A)-H(20C) | 0.9800   |
| Br(1B)-C(11B) | 1.904(2) |
| O(1B)-C(16B)  | 1.235(3) |
| N(1B)-C(4B)   | 1.457(3) |
| N(1B)-C(5B)   | 1.466(3) |
| N(1B)-C(1B)   | 1.485(3) |
| N(2B)-C(7B)   | 1.386(3) |
| N(2B)-C(6B)   | 1.464(3) |
| N(2B)-H(2NB)  | 0.85(4)  |
| N(3B)-C(7B)   | 1.271(4) |
| N(3B)-C(9B)   | 1.458(3) |
| N(4B)-C(16B)  | 1.327(4) |
| N(4B)-C(17B)  | 1.477(4) |
| N(4B)-H(4NB)  | 0.70(4)  |
| C(1B)-C(2B)   | 1.515(4) |

|               |          |
|---------------|----------|
| C(1B)-C(8B)   | 1.526(3) |
| C(1B)-C(7B)   | 1.532(3) |
| C(2B)-C(3B)   | 1.560(4) |
| C(2B)-H(2BA)  | 0.9900   |
| C(2B)-H(2BB)  | 0.9900   |
| C(3B)-C(4B)   | 1.543(4) |
| C(3B)-H(3BA)  | 0.9900   |
| C(3B)-H(3BB)  | 0.9900   |
| C(4B)-H(4BA)  | 0.9900   |
| C(4B)-H(4BB)  | 0.9900   |
| C(5B)-C(16B)  | 1.533(4) |
| C(5B)-C(6B)   | 1.561(3) |
| C(5B)-H(5BA)  | 1.0000   |
| C(6B)-C(8B)   | 1.548(3) |
| C(6B)-H(6BA)  | 1.0000   |
| C(8B)-H(8BA)  | 0.9900   |
| C(8B)-H(8BB)  | 0.9900   |
| C(9B)-C(10B)  | 1.514(4) |
| C(9B)-H(9BA)  | 0.9900   |
| C(9B)-H(9BB)  | 0.9900   |
| C(10B)-C(11B) | 1.391(4) |
| C(10B)-C(15B) | 1.392(4) |
| C(11B)-C(12B) | 1.386(4) |
| C(12B)-C(13B) | 1.381(4) |
| C(12B)-H(12B) | 0.9500   |
| C(13B)-C(14B) | 1.388(4) |
| C(13B)-H(13B) | 0.9500   |
| C(14B)-C(15B) | 1.386(4) |
| C(14B)-H(14B) | 0.9500   |
| C(15B)-H(15B) | 0.9500   |
| C(17B)-C(20B) | 1.521(4) |
| C(17B)-C(18B) | 1.524(4) |
| C(17B)-C(19B) | 1.531(4) |
| C(18B)-H(18D) | 0.9800   |
| C(18B)-H(18E) | 0.9800   |
| C(18B)-H(18F) | 0.9800   |

|                     |            |
|---------------------|------------|
| C(19B)-H(19D)       | 0.9800     |
| C(19B)-H(19E)       | 0.9800     |
| C(19B)-H(19F)       | 0.9800     |
| C(20B)-H(20D)       | 0.9800     |
| C(20B)-H(20E)       | 0.9800     |
| C(20B)-H(20F)       | 0.9800     |
|                     |            |
| C(4A)-N(1A)-C(5A)   | 124.7(2)   |
| C(4A)-N(1A)-C(1A)   | 106.02(19) |
| C(5A)-N(1A)-C(1A)   | 107.83(19) |
| C(7A)-N(2A)-C(6A)   | 106.9(2)   |
| C(7A)-N(2A)-H(2NA)  | 121(2)     |
| C(6A)-N(2A)-H(2NA)  | 118(2)     |
| C(7A)-N(3A)-C(9A)   | 114.6(2)   |
| C(16A)-N(4A)-C(17A) | 128.0(2)   |
| C(16A)-N(4A)-H(4NA) | 115(2)     |
| C(17A)-N(4A)-H(4NA) | 117(2)     |
| N(1A)-C(1A)-C(2A)   | 102.2(2)   |
| N(1A)-C(1A)-C(8A)   | 98.4(2)    |
| C(2A)-C(1A)-C(8A)   | 129.6(2)   |
| N(1A)-C(1A)-C(7A)   | 107.4(2)   |
| C(2A)-C(1A)-C(7A)   | 116.0(2)   |
| C(8A)-C(1A)-C(7A)   | 100.3(2)   |
| C(1A)-C(2A)-C(3A)   | 103.2(2)   |
| C(1A)-C(2A)-H(2AA)  | 111.1      |
| C(3A)-C(2A)-H(2AA)  | 111.1      |
| C(1A)-C(2A)-H(2AB)  | 111.1      |
| C(3A)-C(2A)-H(2AB)  | 111.1      |
| H(2AA)-C(2A)-H(2AB) | 109.1      |
| C(2A)-C(3A)-C(4A)   | 107.1(2)   |
| C(2A)-C(3A)-H(3AA)  | 110.3      |
| C(4A)-C(3A)-H(3AA)  | 110.3      |
| C(2A)-C(3A)-H(3AB)  | 110.3      |
| C(4A)-C(3A)-H(3AB)  | 110.3      |
| H(3AA)-C(3A)-H(3AB) | 108.6      |
| N(1A)-C(4A)-C(3A)   | 101.6(2)   |

|                      |            |
|----------------------|------------|
| N(1A)-C(4A)-H(4AA)   | 111.4      |
| C(3A)-C(4A)-H(4AA)   | 111.4      |
| N(1A)-C(4A)-H(4AB)   | 111.4      |
| C(3A)-C(4A)-H(4AB)   | 111.4      |
| H(4AA)-C(4A)-H(4AB)  | 109.3      |
| N(1A)-C(5A)-C(16A)   | 113.1(2)   |
| N(1A)-C(5A)-C(6A)    | 100.10(19) |
| C(16A)-C(5A)-C(6A)   | 113.8(2)   |
| N(1A)-C(5A)-H(5AA)   | 109.8      |
| C(16A)-C(5A)-H(5AA)  | 109.8      |
| C(6A)-C(5A)-H(5AA)   | 109.8      |
| N(2A)-C(6A)-C(8A)    | 99.7(2)    |
| N(2A)-C(6A)-C(5A)    | 106.90(19) |
| C(8A)-C(6A)-C(5A)    | 103.06(19) |
| N(2A)-C(6A)-H(6AA)   | 115.1      |
| C(8A)-C(6A)-H(6AA)   | 115.1      |
| C(5A)-C(6A)-H(6AA)   | 115.1      |
| N(3A)-C(7A)-N(2A)    | 129.4(2)   |
| N(3A)-C(7A)-C(1A)    | 125.8(2)   |
| N(2A)-C(7A)-C(1A)    | 104.8(2)   |
| C(1A)-C(8A)-C(6A)    | 92.08(19)  |
| C(1A)-C(8A)-H(8AA)   | 113.3      |
| C(6A)-C(8A)-H(8AA)   | 113.3      |
| C(1A)-C(8A)-H(8AB)   | 113.3      |
| C(6A)-C(8A)-H(8AB)   | 113.3      |
| H(8AA)-C(8A)-H(8AB)  | 110.6      |
| N(3A)-C(9A)-C(10A)   | 111.4(2)   |
| N(3A)-C(9A)-H(9AA)   | 109.3      |
| C(10A)-C(9A)-H(9AA)  | 109.3      |
| N(3A)-C(9A)-H(9AB)   | 109.3      |
| C(10A)-C(9A)-H(9AB)  | 109.3      |
| H(9AA)-C(9A)-H(9AB)  | 108.0      |
| C(15A)-C(10A)-C(11A) | 116.5(3)   |
| C(15A)-C(10A)-C(9A)  | 121.4(3)   |
| C(11A)-C(10A)-C(9A)  | 122.2(3)   |
| C(12A)-C(11A)-C(10A) | 122.6(3)   |



|                      |          |
|----------------------|----------|
| C(12A)-C(11A)-Br(1A) | 117.0(2) |
| C(10A)-C(11A)-Br(1A) | 120.3(2) |
| C(13A)-C(12A)-C(11A) | 119.3(3) |
| C(13A)-C(12A)-H(12A) | 120.3    |
| C(11A)-C(12A)-H(12A) | 120.3    |
| C(12A)-C(13A)-C(14A) | 119.5(3) |
| C(12A)-C(13A)-H(13A) | 120.3    |
| C(14A)-C(13A)-H(13A) | 120.3    |
| C(15A)-C(14A)-C(13A) | 120.3(3) |
| C(15A)-C(14A)-H(14A) | 119.8    |
| C(13A)-C(14A)-H(14A) | 119.8    |
| C(10A)-C(15A)-C(14A) | 121.8(3) |
| C(10A)-C(15A)-H(15A) | 119.1    |
| C(14A)-C(15A)-H(15A) | 119.1    |
| O(1A)-C(16A)-N(4A)   | 125.3(3) |
| O(1A)-C(16A)-C(5A)   | 119.9(2) |
| N(4A)-C(16A)-C(5A)   | 114.8(2) |
| N(4A)-C(17A)-C(20A)  | 106.2(3) |
| N(4A)-C(17A)-C(18A)  | 108.8(3) |
| C(20A)-C(17A)-C(18A) | 110.9(3) |
| N(4A)-C(17A)-C(19A)  | 110.2(3) |
| C(20A)-C(17A)-C(19A) | 110.5(3) |
| C(18A)-C(17A)-C(19A) | 110.3(3) |
| C(17A)-C(18A)-H(18A) | 109.5    |
| C(17A)-C(18A)-H(18B) | 109.5    |
| H(18A)-C(18A)-H(18B) | 109.5    |
| C(17A)-C(18A)-H(18C) | 109.5    |
| H(18A)-C(18A)-H(18C) | 109.5    |
| H(18B)-C(18A)-H(18C) | 109.5    |
| C(17A)-C(19A)-H(19A) | 109.5    |
| C(17A)-C(19A)-H(19B) | 109.5    |
| H(19A)-C(19A)-H(19B) | 109.5    |
| C(17A)-C(19A)-H(19C) | 109.5    |
| H(19A)-C(19A)-H(19C) | 109.5    |
| H(19B)-C(19A)-H(19C) | 109.5    |
| C(17A)-C(20A)-H(20A) | 109.5    |

|                      |            |
|----------------------|------------|
| C(17A)-C(20A)-H(20B) | 109.5      |
| H(20A)-C(20A)-H(20B) | 109.5      |
| C(17A)-C(20A)-H(20C) | 109.5      |
| H(20A)-C(20A)-H(20C) | 109.5      |
| H(20B)-C(20A)-H(20C) | 109.5      |
| C(4B)-N(1B)-C(5B)    | 125.1(2)   |
| C(4B)-N(1B)-C(1B)    | 106.31(19) |
| C(5B)-N(1B)-C(1B)    | 107.98(19) |
| C(7B)-N(2B)-C(6B)    | 107.0(2)   |
| C(7B)-N(2B)-H(2NB)   | 123(2)     |
| C(6B)-N(2B)-H(2NB)   | 120(2)     |
| C(7B)-N(3B)-C(9B)    | 116.9(2)   |
| C(16B)-N(4B)-C(17B)  | 127.3(3)   |
| C(16B)-N(4B)-H(4NB)  | 119(3)     |
| C(17B)-N(4B)-H(4NB)  | 114(3)     |
| N(1B)-C(1B)-C(2B)    | 102.1(2)   |
| N(1B)-C(1B)-C(8B)    | 98.78(19)  |
| C(2B)-C(1B)-C(8B)    | 129.3(2)   |
| N(1B)-C(1B)-C(7B)    | 107.8(2)   |
| C(2B)-C(1B)-C(7B)    | 115.9(2)   |
| C(8B)-C(1B)-C(7B)    | 100.45(19) |
| C(1B)-C(2B)-C(3B)    | 102.7(2)   |
| C(1B)-C(2B)-H(2BA)   | 111.2      |
| C(3B)-C(2B)-H(2BA)   | 111.2      |
| C(1B)-C(2B)-H(2BB)   | 111.2      |
| C(3B)-C(2B)-H(2BB)   | 111.2      |
| H(2BA)-C(2B)-H(2BB)  | 109.1      |
| C(4B)-C(3B)-C(2B)    | 106.9(2)   |
| C(4B)-C(3B)-H(3BA)   | 110.4      |
| C(2B)-C(3B)-H(3BA)   | 110.4      |
| C(4B)-C(3B)-H(3BB)   | 110.4      |
| C(2B)-C(3B)-H(3BB)   | 110.4      |
| H(3BA)-C(3B)-H(3BB)  | 108.6      |
| N(1B)-C(4B)-C(3B)    | 101.7(2)   |
| N(1B)-C(4B)-H(4BA)   | 111.4      |
| C(3B)-C(4B)-H(4BA)   | 111.4      |

|                      |            |
|----------------------|------------|
| N(1B)-C(4B)-H(4BB)   | 111.4      |
| C(3B)-C(4B)-H(4BB)   | 111.4      |
| H(4BA)-C(4B)-H(4BB)  | 109.3      |
| N(1B)-C(5B)-C(16B)   | 113.3(2)   |
| N(1B)-C(5B)-C(6B)    | 100.13(18) |
| C(16B)-C(5B)-C(6B)   | 111.0(2)   |
| N(1B)-C(5B)-H(5BA)   | 110.7      |
| C(16B)-C(5B)-H(5BA)  | 110.7      |
| C(6B)-C(5B)-H(5BA)   | 110.7      |
| N(2B)-C(6B)-C(8B)    | 100.02(18) |
| N(2B)-C(6B)-C(5B)    | 107.24(19) |
| C(8B)-C(6B)-C(5B)    | 102.23(19) |
| N(2B)-C(6B)-H(6BA)   | 115.2      |
| C(8B)-C(6B)-H(6BA)   | 115.2      |
| C(5B)-C(6B)-H(6BA)   | 115.2      |
| N(3B)-C(7B)-N(2B)    | 130.7(2)   |
| N(3B)-C(7B)-C(1B)    | 124.5(2)   |
| N(2B)-C(7B)-C(1B)    | 104.8(2)   |
| C(1B)-C(8B)-C(6B)    | 91.96(18)  |
| C(1B)-C(8B)-H(8BA)   | 113.3      |
| C(6B)-C(8B)-H(8BA)   | 113.3      |
| C(1B)-C(8B)-H(8BB)   | 113.3      |
| C(6B)-C(8B)-H(8BB)   | 113.3      |
| H(8BA)-C(8B)-H(8BB)  | 110.6      |
| N(3B)-C(9B)-C(10B)   | 111.2(2)   |
| N(3B)-C(9B)-H(9BA)   | 109.4      |
| C(10B)-C(9B)-H(9BA)  | 109.4      |
| N(3B)-C(9B)-H(9BB)   | 109.4      |
| C(10B)-C(9B)-H(9BB)  | 109.4      |
| H(9BA)-C(9B)-H(9BB)  | 108.0      |
| C(11B)-C(10B)-C(15B) | 116.9(2)   |
| C(11B)-C(10B)-C(9B)  | 121.8(2)   |
| C(15B)-C(10B)-C(9B)  | 121.3(2)   |
| C(12B)-C(11B)-C(10B) | 122.5(2)   |
| C(12B)-C(11B)-Br(1B) | 117.7(2)   |
| C(10B)-C(11B)-Br(1B) | 119.80(19) |

|                      |          |
|----------------------|----------|
| C(13B)-C(12B)-C(11B) | 119.5(3) |
| C(13B)-C(12B)-H(12B) | 120.3    |
| C(11B)-C(12B)-H(12B) | 120.3    |
| C(12B)-C(13B)-C(14B) | 119.4(2) |
| C(12B)-C(13B)-H(13B) | 120.3    |
| C(14B)-C(13B)-H(13B) | 120.3    |
| C(15B)-C(14B)-C(13B) | 120.3(2) |
| C(15B)-C(14B)-H(14B) | 119.8    |
| C(13B)-C(14B)-H(14B) | 119.8    |
| C(14B)-C(15B)-C(10B) | 121.4(3) |
| C(14B)-C(15B)-H(15B) | 119.3    |
| C(10B)-C(15B)-H(15B) | 119.3    |
| O(1B)-C(16B)-N(4B)   | 125.4(2) |
| O(1B)-C(16B)-C(5B)   | 119.7(2) |
| N(4B)-C(16B)-C(5B)   | 114.9(2) |
| N(4B)-C(17B)-C(20B)  | 106.1(2) |
| N(4B)-C(17B)-C(18B)  | 109.8(2) |
| C(20B)-C(17B)-C(18B) | 109.8(2) |
| N(4B)-C(17B)-C(19B)  | 109.4(2) |
| C(20B)-C(17B)-C(19B) | 110.6(2) |
| C(18B)-C(17B)-C(19B) | 111.0(2) |
| C(17B)-C(18B)-H(18D) | 109.5    |
| C(17B)-C(18B)-H(18E) | 109.5    |
| H(18D)-C(18B)-H(18E) | 109.5    |
| C(17B)-C(18B)-H(18F) | 109.5    |
| H(18D)-C(18B)-H(18F) | 109.5    |
| H(18E)-C(18B)-H(18F) | 109.5    |
| C(17B)-C(19B)-H(19D) | 109.5    |
| C(17B)-C(19B)-H(19E) | 109.5    |
| H(19D)-C(19B)-H(19E) | 109.5    |
| C(17B)-C(19B)-H(19F) | 109.5    |
| H(19D)-C(19B)-H(19F) | 109.5    |
| H(19E)-C(19B)-H(19F) | 109.5    |
| C(17B)-C(20B)-H(20D) | 109.5    |
| C(17B)-C(20B)-H(20E) | 109.5    |
| H(20D)-C(20B)-H(20E) | 109.5    |

|                      |       |
|----------------------|-------|
| C(17B)-C(20B)-H(20F) | 109.5 |
| H(20D)-C(20B)-H(20F) | 109.5 |
| H(20E)-C(20B)-H(20F) | 109.5 |

---

Symmetry transformations used to generate equivalent atoms:

Table 4. Anisotropic displacement parameters ( $\text{\AA}^2 \times 10^3$ ) for d14137. The anisotropic displacement factor exponent takes the form:  $-2\pi^2 [ h^2 a^{*2} U^{11} + \dots + 2 h k a^* b^* U^{12} ]$

|        | U <sup>11</sup> | U <sup>22</sup> | U <sup>33</sup> | U <sup>23</sup> | U <sup>13</sup> | U <sup>12</sup> |
|--------|-----------------|-----------------|-----------------|-----------------|-----------------|-----------------|
| Br(1A) | 28(1)           | 31(1)           | 34(1)           | 1(1)            | -4(1)           | -4(1)           |
| O(1A)  | 32(1)           | 30(1)           | 15(1)           | 3(1)            | -1(1)           | -6(1)           |
| N(1A)  | 25(1)           | 18(1)           | 12(1)           | -1(1)           | 2(1)            | -2(1)           |
| N(2A)  | 17(1)           | 23(1)           | 16(1)           | -2(1)           | -1(1)           | -2(1)           |
| N(3A)  | 22(1)           | 24(1)           | 20(1)           | 3(1)            | 3(1)            | -3(1)           |
| N(4A)  | 25(1)           | 30(1)           | 15(1)           | 4(1)            | -2(1)           | -10(1)          |
| C(1A)  | 18(1)           | 19(1)           | 16(1)           | 1(1)            | -1(1)           | 1(1)            |
| C(2A)  | 26(1)           | 28(2)           | 19(1)           | 4(1)            | -4(1)           | -2(1)           |
| C(3A)  | 68(2)           | 42(2)           | 15(1)           | 0(1)            | 8(1)            | 7(2)            |
| C(4A)  | 41(2)           | 24(1)           | 18(1)           | -4(1)           | 7(1)            | 3(1)            |
| C(5A)  | 21(1)           | 21(1)           | 12(1)           | -1(1)           | 0(1)            | -2(1)           |
| C(6A)  | 21(1)           | 22(1)           | 15(1)           | -4(1)           | 4(1)            | -3(1)           |
| C(7A)  | 22(1)           | 16(1)           | 15(1)           | -1(1)           | 2(1)            | 0(1)            |
| C(8A)  | 21(1)           | 23(1)           | 22(1)           | -3(1)           | 2(1)            | 3(1)            |
| C(9A)  | 23(1)           | 35(2)           | 18(1)           | 6(1)            | -1(1)           | -5(1)           |
| C(10A) | 18(1)           | 31(2)           | 27(1)           | 9(1)            | 5(1)            | 3(1)            |
| C(11A) | 22(1)           | 31(2)           | 29(1)           | 10(1)           | 1(1)            | 3(1)            |
| C(12A) | 26(2)           | 43(2)           | 49(2)           | 18(2)           | 8(1)            | -6(1)           |
| C(13A) | 33(2)           | 69(3)           | 51(2)           | 26(2)           | 16(2)           | -4(2)           |
| C(14A) | 37(2)           | 78(3)           | 28(2)           | 15(2)           | 12(1)           | 6(2)            |
| C(15A) | 25(1)           | 51(2)           | 27(2)           | 5(1)            | 5(1)            | 2(1)            |
| C(16A) | 25(1)           | 19(1)           | 14(1)           | -1(1)           | 1(1)            | -1(1)           |
| C(17A) | 26(2)           | 31(2)           | 27(2)           | -1(1)           | 4(1)            | -13(1)          |
| C(18A) | 49(2)           | 30(2)           | 37(2)           | -6(1)           | 16(2)           | -13(2)          |
| C(19A) | 34(2)           | 43(2)           | 48(2)           | -5(2)           | 18(2)           | -8(2)           |
| C(20A) | 36(2)           | 73(3)           | 47(2)           | 10(2)           | -13(2)          | -28(2)          |
| Br(1B) | 29(1)           | 28(1)           | 22(1)           | -3(1)           | -3(1)           | -5(1)           |
| O(1B)  | 22(1)           | 34(1)           | 15(1)           | 7(1)            | 0(1)            | -3(1)           |
| N(1B)  | 16(1)           | 16(1)           | 19(1)           | 3(1)            | 2(1)            | 3(1)            |
| N(2B)  | 15(1)           | 20(1)           | 16(1)           | 2(1)            | -2(1)           | -4(1)           |
| N(3B)  | 18(1)           | 20(1)           | 19(1)           | 3(1)            | 0(1)            | -2(1)           |

|        |       |       |       |       |       |       |
|--------|-------|-------|-------|-------|-------|-------|
| N(4B)  | 19(1) | 26(1) | 15(1) | 7(1)  | 1(1)  | -1(1) |
| C(1B)  | 16(1) | 18(1) | 15(1) | 2(1)  | 0(1)  | -1(1) |
| C(2B)  | 23(1) | 24(1) | 19(1) | 5(1)  | -3(1) | 1(1)  |
| C(3B)  | 27(1) | 28(2) | 32(2) | 11(1) | 1(1)  | 7(1)  |
| C(4B)  | 25(1) | 20(1) | 32(2) | 6(1)  | 5(1)  | 6(1)  |
| C(5B)  | 15(1) | 19(1) | 16(1) | 0(1)  | 0(1)  | 0(1)  |
| C(6B)  | 16(1) | 16(1) | 16(1) | 2(1)  | 1(1)  | 0(1)  |
| C(7B)  | 14(1) | 19(1) | 16(1) | 0(1)  | 1(1)  | 2(1)  |
| C(8B)  | 18(1) | 16(1) | 17(1) | 0(1)  | 1(1)  | -1(1) |
| C(9B)  | 23(1) | 24(1) | 18(1) | 3(1)  | -1(1) | -8(1) |
| C(10B) | 20(1) | 14(1) | 20(1) | 2(1)  | 5(1)  | 2(1)  |
| C(11B) | 20(1) | 14(1) | 20(1) | 2(1)  | 2(1)  | 2(1)  |
| C(12B) | 22(1) | 16(1) | 33(2) | 1(1)  | 6(1)  | -1(1) |
| C(13B) | 25(1) | 22(1) | 30(1) | 10(1) | 11(1) | 3(1)  |
| C(14B) | 27(1) | 27(1) | 19(1) | 5(1)  | 6(1)  | 6(1)  |
| C(15B) | 21(1) | 21(1) | 21(1) | 1(1)  | 1(1)  | 0(1)  |
| C(16B) | 17(1) | 21(1) | 18(1) | -1(1) | 5(1)  | 0(1)  |
| C(17B) | 14(1) | 23(1) | 24(1) | 3(1)  | 2(1)  | -3(1) |
| C(18B) | 20(1) | 26(1) | 31(2) | 2(1)  | 11(1) | 2(1)  |
| C(19B) | 23(1) | 24(1) | 29(1) | -2(1) | 6(1)  | 0(1)  |
| C(20B) | 21(1) | 35(2) | 31(2) | 3(1)  | -6(1) | -6(1) |

---

Table 5. Hydrogen coordinates ( $\times 10^4$ ) and isotropic displacement parameters ( $\text{\AA}^2 \times 10^{-3}$ ) for d14137.

|        | x     | y     | z     | U(eq) |
|--------|-------|-------|-------|-------|
| H(2AA) | 782   | 1561  | 7835  | 30    |
| H(2AB) | -800  | 1171  | 7941  | 30    |
| H(3AA) | 1780  | 516   | 7344  | 50    |
| H(3AB) | 116   | 174   | 7228  | 50    |
| H(4AA) | 1054  | -564  | 8627  | 33    |
| H(4AB) | 2508  | -52   | 8961  | 33    |
| H(5AA) | 2024  | -35   | 10919 | 22    |
| H(6AA) | 810   | 1048  | 11914 | 23    |
| H(8AA) | -1132 | 1179  | 10215 | 26    |
| H(8AB) | -77   | 1902  | 10339 | 26    |
| H(9AA) | 5352  | 1311  | 10164 | 31    |
| H(9AB) | 4588  | 2056  | 10461 | 31    |
| H(12A) | 8444  | 3380  | 9274  | 47    |
| H(13A) | 8077  | 3205  | 7391  | 60    |
| H(14A) | 6273  | 2369  | 6614  | 56    |
| H(15A) | 4838  | 1726  | 7702  | 41    |
| H(18A) | -1818 | -1835 | 10232 | 57    |
| H(18B) | -3056 | -1954 | 11024 | 57    |
| H(18C) | -1403 | -1677 | 11510 | 57    |
| H(19A) | -3701 | -83   | 11552 | 61    |
| H(19B) | -2625 | -617  | 12329 | 61    |
| H(19C) | -4260 | -885  | 11786 | 61    |
| H(20A) | -4153 | -296  | 9557  | 81    |
| H(20B) | -4745 | -1098 | 9747  | 81    |
| H(20C) | -3403 | -978  | 9044  | 81    |
| H(2BA) | 3600  | -495  | 7206  | 27    |
| H(2BB) | 4972  | 69    | 7183  | 27    |
| H(3BA) | 6388  | -886  | 6774  | 35    |
| H(3BB) | 4937  | -1408 | 6579  | 35    |
| H(4BA) | 6312  | -918  | 4942  | 31    |



|        |           |          |           |       |
|--------|-----------|----------|-----------|-------|
| H(4BB) | 4598      | -1211    | 4754      | 31    |
| H(5BA) | 3943      | -198     | 3341      | 21    |
| H(6BA) | 2347      | 980      | 3662      | 20    |
| H(8BA) | 4004      | 1117     | 5506      | 20    |
| H(8BB) | 2283      | 954      | 5710      | 20    |
| H(9BA) | 597       | -1637    | 4380      | 27    |
| H(9BB) | -323      | -910     | 4549      | 27    |
| H(12B) | -3518     | -2798    | 5617      | 28    |
| H(13B) | -2928     | -2690    | 7511      | 30    |
| H(14B) | -895      | -1963    | 8251      | 29    |
| H(15B) | 528       | -1352    | 7115      | 26    |
| H(18D) | 8874      | 774      | 3216      | 38    |
| H(18E) | 9247      | 1615     | 3082      | 38    |
| H(18F) | 7710      | 1282     | 2461      | 38    |
| H(19D) | 6454      | 2303     | 4632      | 37    |
| H(19E) | 6167      | 2205     | 3336      | 37    |
| H(19F) | 7705      | 2560     | 3916      | 37    |
| H(20D) | 9209      | 908      | 5223      | 45    |
| H(20E) | 8258      | 1500     | 5777      | 45    |
| H(20F) | 9581      | 1752     | 5123      | 45    |
| H(2NA) | 3160(40)  | 1194(17) | 11280(30) | 15(8) |
| H(2NB) | 1130(40)  | -192(18) | 3670(30)  | 21(8) |
| H(4NA) | -1440(40) | -216(19) | 9850(30)  | 25(8) |
| H(4NB) | 6590(40)  | 707(19)  | 4710(30)  | 14(8) |

---

Table 6. Torsion angles [ $^{\circ}$ ] for d14137.

---

|                          |           |
|--------------------------|-----------|
| C(4A)-N(1A)-C(1A)-C(2A)  | 46.3(3)   |
| C(5A)-N(1A)-C(1A)-C(2A)  | -178.1(2) |
| C(4A)-N(1A)-C(1A)-C(8A)  | -180.0(2) |
| C(5A)-N(1A)-C(1A)-C(8A)  | -44.4(2)  |
| C(4A)-N(1A)-C(1A)-C(7A)  | -76.3(2)  |
| C(5A)-N(1A)-C(1A)-C(7A)  | 59.3(2)   |
| N(1A)-C(1A)-C(2A)-C(3A)  | -32.8(3)  |
| C(8A)-C(1A)-C(2A)-C(3A)  | -144.8(3) |
| C(7A)-C(1A)-C(2A)-C(3A)  | 83.7(3)   |
| C(1A)-C(2A)-C(3A)-C(4A)  | 10.3(3)   |
| C(5A)-N(1A)-C(4A)-C(3A)  | -164.4(3) |
| C(1A)-N(1A)-C(4A)-C(3A)  | -38.5(3)  |
| C(2A)-C(3A)-C(4A)-N(1A)  | 16.8(3)   |
| C(4A)-N(1A)-C(5A)-C(16A) | -104.1(3) |
| C(1A)-N(1A)-C(5A)-C(16A) | 130.8(2)  |
| C(4A)-N(1A)-C(5A)-C(6A)  | 134.5(2)  |
| C(1A)-N(1A)-C(5A)-C(6A)  | 9.3(2)    |
| C(7A)-N(2A)-C(6A)-C(8A)  | -40.8(2)  |
| C(7A)-N(2A)-C(6A)-C(5A)  | 66.2(3)   |
| N(1A)-C(5A)-C(6A)-N(2A)  | -75.7(2)  |
| C(16A)-C(5A)-C(6A)-N(2A) | 163.4(2)  |
| N(1A)-C(5A)-C(6A)-C(8A)  | 28.9(2)   |
| C(16A)-C(5A)-C(6A)-C(8A) | -92.0(2)  |
| C(9A)-N(3A)-C(7A)-N(2A)  | -2.0(4)   |
| C(9A)-N(3A)-C(7A)-C(1A)  | 177.9(2)  |
| C(6A)-N(2A)-C(7A)-N(3A)  | -173.8(3) |
| C(6A)-N(2A)-C(7A)-C(1A)  | 6.3(3)    |
| N(1A)-C(1A)-C(7A)-N(3A)  | 108.6(3)  |
| C(2A)-C(1A)-C(7A)-N(3A)  | -5.0(4)   |
| C(8A)-C(1A)-C(7A)-N(3A)  | -149.1(3) |
| N(1A)-C(1A)-C(7A)-N(2A)  | -71.4(2)  |
| C(2A)-C(1A)-C(7A)-N(2A)  | 174.9(2)  |
| C(8A)-C(1A)-C(7A)-N(2A)  | 30.8(3)   |
| N(1A)-C(1A)-C(8A)-C(6A)  | 57.8(2)   |

|                             |           |
|-----------------------------|-----------|
| C(2A)-C(1A)-C(8A)-C(6A)     | 171.4(3)  |
| C(7A)-C(1A)-C(8A)-C(6A)     | -51.8(2)  |
| N(2A)-C(6A)-C(8A)-C(1A)     | 56.2(2)   |
| C(5A)-C(6A)-C(8A)-C(1A)     | -53.8(2)  |
| C(7A)-N(3A)-C(9A)-C(10A)    | -163.1(2) |
| N(3A)-C(9A)-C(10A)-C(15A)   | -23.7(4)  |
| N(3A)-C(9A)-C(10A)-C(11A)   | 155.2(3)  |
| C(15A)-C(10A)-C(11A)-C(12A) | 0.2(4)    |
| C(9A)-C(10A)-C(11A)-C(12A)  | -178.8(3) |
| C(15A)-C(10A)-C(11A)-Br(1A) | -179.5(2) |
| C(9A)-C(10A)-C(11A)-Br(1A)  | 1.5(4)    |
| C(10A)-C(11A)-C(12A)-C(13A) | -0.1(5)   |
| Br(1A)-C(11A)-C(12A)-C(13A) | 179.7(3)  |
| C(11A)-C(12A)-C(13A)-C(14A) | -0.2(6)   |
| C(12A)-C(13A)-C(14A)-C(15A) | 0.3(6)    |
| C(11A)-C(10A)-C(15A)-C(14A) | -0.1(5)   |
| C(9A)-C(10A)-C(15A)-C(14A)  | 178.9(3)  |
| C(13A)-C(14A)-C(15A)-C(10A) | -0.1(6)   |
| C(17A)-N(4A)-C(16A)-O(1A)   | -2.4(5)   |
| C(17A)-N(4A)-C(16A)-C(5A)   | 178.8(3)  |
| N(1A)-C(5A)-C(16A)-O(1A)    | 170.2(2)  |
| C(6A)-C(5A)-C(16A)-O(1A)    | -76.5(3)  |
| N(1A)-C(5A)-C(16A)-N(4A)    | -10.9(3)  |
| C(6A)-C(5A)-C(16A)-N(4A)    | 102.4(3)  |
| C(16A)-N(4A)-C(17A)-C(20A)  | 177.5(3)  |
| C(16A)-N(4A)-C(17A)-C(18A)  | -63.2(4)  |
| C(16A)-N(4A)-C(17A)-C(19A)  | 57.9(4)   |
| C(4B)-N(1B)-C(1B)-C(2B)     | 47.0(3)   |
| C(5B)-N(1B)-C(1B)-C(2B)     | -176.6(2) |
| C(4B)-N(1B)-C(1B)-C(8B)     | -179.6(2) |
| C(5B)-N(1B)-C(1B)-C(8B)     | -43.2(2)  |
| C(4B)-N(1B)-C(1B)-C(7B)     | -75.5(2)  |
| C(5B)-N(1B)-C(1B)-C(7B)     | 60.9(2)   |
| N(1B)-C(1B)-C(2B)-C(3B)     | -32.9(2)  |
| C(8B)-C(1B)-C(2B)-C(3B)     | -145.0(3) |
| C(7B)-C(1B)-C(2B)-C(3B)     | 83.9(3)   |

|                             |             |
|-----------------------------|-------------|
| C(1B)-C(2B)-C(3B)-C(4B)     | 10.0(3)     |
| C(5B)-N(1B)-C(4B)-C(3B)     | -166.2(2)   |
| C(1B)-N(1B)-C(4B)-C(3B)     | -39.4(3)    |
| C(2B)-C(3B)-C(4B)-N(1B)     | 17.2(3)     |
| C(4B)-N(1B)-C(5B)-C(16B)    | -108.4(3)   |
| C(1B)-N(1B)-C(5B)-C(16B)    | 125.6(2)    |
| C(4B)-N(1B)-C(5B)-C(6B)     | 133.4(2)    |
| C(1B)-N(1B)-C(5B)-C(6B)     | 7.4(2)      |
| C(7B)-N(2B)-C(6B)-C(8B)     | -39.2(2)    |
| C(7B)-N(2B)-C(6B)-C(5B)     | 67.1(2)     |
| N(1B)-C(5B)-C(6B)-N(2B)     | -74.1(2)    |
| C(16B)-C(5B)-C(6B)-N(2B)    | 165.9(2)    |
| N(1B)-C(5B)-C(6B)-C(8B)     | 30.6(2)     |
| C(16B)-C(5B)-C(6B)-C(8B)    | -89.4(2)    |
| C(9B)-N(3B)-C(7B)-N(2B)     | 1.4(4)      |
| C(9B)-N(3B)-C(7B)-C(1B)     | -178.2(2)   |
| C(6B)-N(2B)-C(7B)-N(3B)     | -175.1(3)   |
| C(6B)-N(2B)-C(7B)-C(1B)     | 4.5(2)      |
| N(1B)-C(1B)-C(7B)-N(3B)     | 109.2(3)    |
| C(2B)-C(1B)-C(7B)-N(3B)     | -4.4(4)     |
| C(8B)-C(1B)-C(7B)-N(3B)     | -148.0(2)   |
| N(1B)-C(1B)-C(7B)-N(2B)     | -70.5(2)    |
| C(2B)-C(1B)-C(7B)-N(2B)     | 175.9(2)    |
| C(8B)-C(1B)-C(7B)-N(2B)     | 32.3(2)     |
| N(1B)-C(1B)-C(8B)-C(6B)     | 57.89(19)   |
| C(2B)-C(1B)-C(8B)-C(6B)     | 171.4(2)    |
| C(7B)-C(1B)-C(8B)-C(6B)     | -52.2(2)    |
| N(2B)-C(6B)-C(8B)-C(1B)     | 55.5(2)     |
| C(5B)-C(6B)-C(8B)-C(1B)     | -54.8(2)    |
| C(7B)-N(3B)-C(9B)-C(10B)    | -151.1(2)   |
| N(3B)-C(9B)-C(10B)-C(11B)   | -170.0(2)   |
| N(3B)-C(9B)-C(10B)-C(15B)   | 10.8(4)     |
| C(15B)-C(10B)-C(11B)-C(12B) | 0.8(4)      |
| C(9B)-C(10B)-C(11B)-C(12B)  | -178.4(3)   |
| C(15B)-C(10B)-C(11B)-Br(1B) | -179.79(19) |
| C(9B)-C(10B)-C(11B)-Br(1B)  | 1.0(4)      |

|                             |           |
|-----------------------------|-----------|
| C(10B)-C(11B)-C(12B)-C(13B) | -1.0(4)   |
| Br(1B)-C(11B)-C(12B)-C(13B) | 179.6(2)  |
| C(11B)-C(12B)-C(13B)-C(14B) | 0.5(4)    |
| C(12B)-C(13B)-C(14B)-C(15B) | 0.1(4)    |
| C(13B)-C(14B)-C(15B)-C(10B) | -0.3(4)   |
| C(11B)-C(10B)-C(15B)-C(14B) | -0.2(4)   |
| C(9B)-C(10B)-C(15B)-C(14B)  | 179.0(2)  |
| C(17B)-N(4B)-C(16B)-O(1B)   | 3.8(4)    |
| C(17B)-N(4B)-C(16B)-C(5B)   | -174.7(2) |
| N(1B)-C(5B)-C(16B)-O(1B)    | 178.1(2)  |
| C(6B)-C(5B)-C(16B)-O(1B)    | -70.2(3)  |
| N(1B)-C(5B)-C(16B)-N(4B)    | -3.4(3)   |
| C(6B)-C(5B)-C(16B)-N(4B)    | 108.4(3)  |
| C(16B)-N(4B)-C(17B)-C(20B)  | 178.3(3)  |
| C(16B)-N(4B)-C(17B)-C(18B)  | -63.0(3)  |
| C(16B)-N(4B)-C(17B)-C(19B)  | 59.0(3)   |

---

Symmetry transformations used to generate equivalent atoms:

Table 7. Hydrogen bonds for d14137 [ $\text{\AA}$  and  $^\circ$ ].

| D-H...A                | d(D-H)  | d(H...A) | d(D...A) | $\angle$ (DHA) |
|------------------------|---------|----------|----------|----------------|
| N(4A)-H(4NA)...N(1A)   | 0.89(4) | 2.17(3)  | 2.672(3) | 115(3)         |
| N(4B)-H(4NB)...N(1B)   | 0.70(4) | 2.30(3)  | 2.677(3) | 116(3)         |
| N(2B)-H(2NB)...O(1A)#1 | 0.85(4) | 2.07(4)  | 2.913(3) | 171(3)         |
| N(2A)-H(2NA)...O(1B)#2 | 0.76(4) | 2.13(4)  | 2.874(3) | 165(3)         |

Symmetry transformations used to generate equivalent atoms:

#1  $x, y, z-1$  #2  $x, y, z+1$
